# Supplementary material for: Postharvest Storage Practices of Maize in Rift Valley and Lower Eastern Regions of Kenya: A Cross-Sectional Study
Source: Hindawi journal article supplement (doi:10.1155/2020/6109214), 2020-02-01
Supplement: f1 [file 6109214.f1.pdf]

| id  | qno | date      | region      | county      | village    | gps      | direction | degree |
|-----|-----|-----------|-------------|-------------|------------|----------|-----------|--------|
| 150 | 35  | 2-May-17  | Rift valley | Trans-nzoia | Sinendet   | 1.0177   |           |        |
| 264 | 48  | 20-Apr-17 | Lower East  | Kitui       | UAE        | -1.80374 | South     | 1      |
| 100 | 50  | 22-Apr-17 | Rift valley | Nakuru      | Saptet     | -0.26169 | South     | 0      |
| 1   | 1   | 29-Apr-17 | Rift valley | Bomet       | Kapchumba  | -0.88603 | South     | 0      |
| 2   | 2   | 29-Apr-17 | Rift valley | Bomet       | Kapchumba  | -1.02864 | South     | 1      |
| 9   | 9   | 29-Apr-17 | Rift valley | Bomet       | Kapchumba  | -0.94487 | South     | 0      |
| 11  | 11  | 29-Apr-17 | Rift valley | Bomet       | Kapchumba  | -0.88606 | South     | 0      |
| 12  | 12  | 29-Apr-17 | Rift valley | Bomet       | Kapchumba  | -0.87197 | South     | 0      |
| 13  | 13  | 29-Apr-17 | Rift valley | Bomet       | Kapchumba  | -0.82735 | South     | 0      |
| 15  | 15  | 29-Apr-17 | Rift valley | Bomet       | Kapchumba  | -0.83756 | South     | 0      |
| 16  | 16  | 29-Apr-17 | Rift valley | Bomet       | Kapchumba  | -0.80862 | South     | 0      |
| 17  | 17  | 29-Apr-17 | Rift valley | Bomet       | Kapchumba  | -0.8443  | South     | 0      |
| 19  | 19  | 29-Apr-17 | Rift valley | Bomet       | Kapchumba  | -0.87268 | South     | 0      |
| 20  | 20  | 29-Apr-17 | Rift valley | Bomet       | Kapchumba  | -0.94868 | South     | 0      |
| 25  | 25  | 30-Apr-17 | Rift valley | Bomet       | Chesambai  | -0.96405 | South     | 0      |
| 26  | 26  | 30-Apr-17 | Rift valley | Bomet       | Chesambai  | -0.77989 | South     | 0      |
| 27  | 27  | 30-Apr-17 | Rift valley | Bomet       | Chesambai  | -0.96405 | South     | 0      |
| 29  | 29  | 30-Apr-17 | Rift valley | Bomet       | Chesambai  | -0.92295 | South     | 0      |
| 31  | 31  | 1-May-17  | Rift valley | Bomet       | Kapolesobe | -0.96134 | South     | 0      |
| 35  | 35  | 1-May-17  | Rift valley | Bomet       | Kapolesobe | -0.91222 | South     | 0      |
| 36  | 36  | 1-May-17  | Rift valley | Bomet       | Kapolesobe | -0.91821 | South     | 0      |
| 38  | 38  | 1-May-17  | Rift valley | Bomet       | Kapolesobe | -0.94139 | South     | 0      |
| 39  | 39  | 1-May-17  | Rift valley | Bomet       | Kapolesobe | -0.93933 | South     | 0      |
| 42  | 42  | 1-May-17  | Rift valley | Bomet       | Kapombe    | -0.83735 | South     | 0      |
| 43  | 43  | 1-May-17  | Rift valley | Bomet       | Kapombe    | -0.87197 | South     | 0      |
| 46  | 46  | 29-Apr-17 | Rift valley | Bomet       | Kapchumba  | -0.84435 | South     | 0      |
| 78  | 28  | 22-Apr-17 | Rift valley | Nakuru      | Saptet     | -0.26099 | South     | 0      |
| 82  | 32  | 22-Apr-17 | Rift valley | Nakuru      | Saptet     | -0.26037 | South     | 0      |
| 95  | 45  | 22-Apr-17 | Rift valley | Nakuru      | Saptet     | -0.26357 |           |        |
| 99  | 49  | 22-Apr-17 | Rift valley | Nakuru      | Saptet     | -0.26158 | South     | 0      |
| 115 | 15  | 1-May-17  | Rift valley | Nakuru      | Chepseon   | -0.20498 | South     | 0      |
| 119 | 4   | 2-May-17  | Rift valley | Trans-nzoia | Chepkaitit | 1.00604  | North     | 1      |
| 126 | 11  | 2-May-17  | Rift valley | Trans-nzoia | Chepkaitit | 1.00533  | North     | 1      |
| 130 | 15  | 2-May-17  | Rift valley | Trans-nzoia | Chepkaitit | 1.00223  | North     | 1      |
| 141 | 26  | 2-May-17  | Rift valley | Trans-nzoia | Chepkaitit | 1.00486  | North     | 1      |
| 151 | 36  | 2-May-17  | Rift valley | Trans-nzoia | Sinendet   | 1.01799  |           |        |
| 161 | 46  | 2-May-17  | Rift valley | Trans-nzoia | Laboot     | 1.01203  | North     | 1      |
| 3   | 3   | 29-Apr-17 | Rift valley | Bomet       | Kapchumba  | -1.00305 | South     | 1      |
| 5   | 5   | 29-Apr-17 | Rift valley | Bomet       | Kapchumba  | -0.97369 | South     | 0      |
| 6   | 6   | 29-Apr-17 | Rift valley | Bomet       | Kapchumba  | -0.97758 | South     | 0      |
| 7   | 7   | 29-Apr-17 | Rift valley | Bomet       | Kapchumba  | -0.9521  | South     | 0      |
| 8   | 8   | 29-Apr-17 | Rift valley | Bomet       | Kapchumba  | -0.9474  | South     | 0      |
| 10  | 10  | 29-Apr-17 | Rift valley | Bomet       | Kapchumba  | -0.92506 | South     | 0      |
| 14  | 14  | 29-Apr-17 | Rift valley | Bomet       | Kapchumba  | -0.886   | South     | 0      |
| 18  | 18  | 29-Apr-17 | Rift valley | Bomet       | Kapchumba  | -0.88492 | South     | 0      |
| 21  | 21  | 30-Apr-17 | Rift valley | Bomet       | Chesambai  | -0.83735 | South     | 0      |

|     |    |           |             |             |            |          |       |   |
|-----|----|-----------|-------------|-------------|------------|----------|-------|---|
| 22  | 22 | 30-Apr-17 | Rift valley | Bomet       | Chesambai  | -0.96405 | South | 0 |
| 23  | 23 | 30-Apr-17 | Rift valley | Bomet       | Chesambai  | -0.886   | South | 0 |
| 24  | 24 | 30-Apr-17 | Rift valley | Bomet       | Chesambai  | -0.96134 | South | 5 |
| 28  | 28 | 30-Apr-17 | Rift valley | Bomet       | Chesambai  | -0.94239 | South | 0 |
| 30  | 30 | 30-Apr-17 | Rift valley | Bomet       | Chesambai  | -0.94868 | South | 0 |
| 33  | 33 | 1-May-17  | Rift valley | Bomet       | Kaplombe   | -0.9986  | South | 0 |
| 34  | 34 | 1-May-17  | Rift valley | Bomet       | Kapolesobe | -0.96405 | South | 0 |
| 41  | 41 | 1-May-17  | Rift valley | Bomet       | Kaplombe   | -0.96155 | South | 0 |
| 44  | 44 | 1-May-17  | Rift valley | Bomet       | Kaplombe   | -0.78333 | South | 0 |
| 53  | 3  | 22-Apr-17 | Rift valley | Nakuru      | Waldai     | -0.25122 | South | 0 |
| 76  | 26 | 22-Apr-17 | Rift valley | Nakuru      | Waldai     | -0.2629  | South | 0 |
| 81  | 31 | 22-Apr-17 | Rift valley | Nakuru      | Saptet     | -0.25941 | South | 0 |
| 104 | 4  | 29-Apr-17 | Rift valley | Nakuru      | Chepseon   | -0.20391 | South | 0 |
| 107 | 7  | 29-Apr-17 | Rift valley | Nakuru      | Chepseon   | -0.20461 | South | 0 |
| 108 | 8  | 29-Apr-17 | Rift valley | Nakuru      | Chepseon   | -0.20452 | South | 0 |
| 109 | 9  | 30-Apr-17 | Rift valley | Nakuru      | Chepseon   | -0.20668 | South | 0 |
| 120 | 5  | 2-May-17  | Rift valley | Trans-nzoia | Chepkaitit | 1.00604  | North | 1 |
| 121 | 6  | 2-May-17  | Rift valley | Trans-nzoia | Chepkaitit | 1.0005   | North | 1 |
| 127 | 12 | 2-May-17  | Rift valley | Trans-nzoia | Chepkaitit | 1.00508  | North | 1 |
| 128 | 13 | 2-May-17  | Rift valley | Trans-nzoia | Chepkaitit | 1.00535  | North | 1 |
| 132 | 17 | 2-May-17  | Rift valley | Trans-nzoia | Chepkaitit | 1.00235  | North | 1 |
| 134 | 19 | 2-May-17  | Rift valley | Trans-nzoia | Chepkaitit | 1.00205  | North | 1 |
| 137 | 22 | 2-May-17  | Rift valley | Trans-nzoia | Chepkaitit | 1.00274  | North | 1 |
| 138 | 23 | 2-May-17  | Rift valley | Trans-nzoia | Chepkaitit | 1.00092  | North | 1 |
| 142 | 27 | 2-May-17  | Rift valley | Trans-nzoia | Sinendet   | 1.01715  |       |   |
| 144 | 29 | 2-May-17  | Rift valley | Trans-nzoia | Sinendet   | 1.01484  |       |   |
| 145 | 30 | 2-May-17  | Rift valley | Trans-nzoia | Sinendet   | 1.01574  |       |   |
| 146 | 31 | 2-May-17  | Rift valley | Trans-nzoia | Sinendet   | 1.0161   |       |   |
| 147 | 32 | 2-May-17  | Rift valley | Trans-nzoia | Sinendet   | 1.01664  |       |   |
| 152 | 37 | 2-May-17  | Rift valley | Trans-nzoia | Sinendet   |          |       |   |
| 153 | 38 | 2-May-17  | Rift valley | Trans-nzoia | Sinendet   |          |       |   |
| 154 | 39 | 2-May-17  | Rift valley | Trans-nzoia | Laboot     | 1.01197  |       |   |
| 155 | 40 | 2-May-17  | Rift valley | Trans-nzoia | Laboot     | 1.0103   | North | 1 |
| 156 | 41 | 2-May-17  | Rift valley | Trans-nzoia | Laboot     | 1.01087  | North | 1 |
| 157 | 42 | 2-May-17  | Rift valley | Trans-nzoia | Laboot     | 1.01092  | North | 1 |
| 158 | 43 | 2-May-17  | Rift valley | Trans-nzoia | Laboot     | 1.01129  | North | 1 |
| 159 | 44 | 2-May-17  | Rift valley | Trans-nzoia | Laboot     | 1.01181  | North | 1 |
| 165 | 50 | 2-May-17  | Rift valley | Trans-nzoia | Laboot     | 1.01131  | North | 1 |
| 254 | 38 | 20-Apr-17 | Lower East  | Kitui       | UAE        | -1.80272 | South | 1 |
| 219 | 2  | 20-Apr-17 | Lower East  | Kitui       | Kiteta     | -1.75619 |       |   |
| 231 | 14 | 20-Apr-17 | Lower East  | Kitui       | Kiteta     | -1.75428 |       |   |
| 221 | 4  | 20-Apr-17 | Lower East  | Kitui       | Kiteta     | -1.7542  |       |   |
| 171 | 4  | #####     | Lower East  | Machakos    | Uvalini    | -1.40416 | South | 1 |
| 173 | 6  | #####     | Lower East  | Machakos    | Uvalini    | -1.48651 | South | 1 |
| 175 | 8  | #####     | Lower East  | Machakos    | Uvalini    | -0.1415  | South | 1 |
| 189 | 22 | #####     | Lower East  | Machakos    | Uvalini    |          | South | 1 |
| 191 | 24 | #####     | Lower East  | Machakos    | Uvalini    |          | South | 1 |

|     |    |           |                     |           |          |       |   |
|-----|----|-----------|---------------------|-----------|----------|-------|---|
| 201 | 37 | #####     | Lower East Machakos | Kithima   | -1.40416 | South | 1 |
| 202 | 38 | #####     | Lower East Machakos | Kithima   | -1.4058  | South | 1 |
| 208 | 44 | #####     | Lower East Machakos | Kithima   | -1.40378 | South | 1 |
| 209 | 45 | #####     | Lower East Machakos | Kithima   | -1.4048  | South | 1 |
| 212 | 48 | #####     | Lower East Machakos | Kithima   | -1.40285 | South | 1 |
| 213 | 49 | #####     | Lower East Machakos | Kithima   | -1.39178 | South | 1 |
| 226 | 9  | 20-Apr-17 | Lower East Kitui    | Kiteta    | -1.7567  |       |   |
| 232 | 15 | 20-Apr-17 | Lower East Kitui    | Kiteta    | -1.75261 |       |   |
| 233 | 17 | 20-Apr-17 | Lower East Kitui    | Kiteta    | -1.75385 |       |   |
| 235 | 19 | 20-Apr-17 | Lower East Kitui    | Kiteta    | -1.75607 |       |   |
| 236 | 20 | 20-Apr-17 | Lower East Kitui    | Kiteta    | -1.75288 |       |   |
| 243 | 27 | 20-Apr-17 | Lower East Kitui    | Kiteta    | -1.80142 | South | 1 |
| 244 | 28 | 20-Apr-17 | Lower East Kitui    | UAE       |          |       |   |
| 247 | 31 | 20-Apr-17 | Lower East Kitui    | UAE       |          |       |   |
| 249 | 33 | 20-Apr-17 | Lower East Kitui    | UAE       | -1.80365 | South | 1 |
| 250 | 34 | 20-Apr-17 | Lower East Kitui    | UAE       | -1.83645 | South | 1 |
| 253 | 37 | 20-Apr-17 | Lower East Kitui    | UAE       | -1.8491  | South | 1 |
| 258 | 42 | 20-Apr-17 | Lower East Kitui    | UAE       | -1.80252 | South | 1 |
| 259 | 43 | 20-Apr-17 | Lower East Kitui    | UAE       |          |       |   |
| 260 | 44 | 20-Apr-17 | Lower East Kitui    | UAE       |          |       |   |
| 261 | 45 | 20-Apr-17 | Lower East Kitui    | UAE       |          |       |   |
| 262 | 46 | 20-Apr-17 | Lower East Kitui    | UAE       |          |       |   |
| 265 | 49 | 20-Apr-17 | Lower East Kitui    | UAE       |          |       |   |
| 271 | 33 | 18-Apr-17 | Lower East Makueni  | Kiatine   | -1.761   |       |   |
| 273 | 2  | 18-Apr-17 | Lower East Makueni  | Nthangu   | -1.76027 | South | 1 |
| 282 | 15 | 18-Apr-17 | Lower East Makueni  | Nthangu   | -1.75858 | South | 1 |
| 293 | 10 | 18-Apr-17 | Lower East Makueni  | Thangu    | -1.75978 | South | 1 |
| 295 | 13 | 18-Apr-17 | Lower East Makueni  | Kyumu     | -1.74074 |       |   |
| 296 | 26 | 18-Apr-17 | Lower East Makueni  | Kyumu     | -1.78235 |       |   |
| 298 | 28 | 18-Apr-17 | Lower East Makueni  | Kyumu     | -1.76819 |       |   |
| 303 | 45 | 18-Apr-17 | Lower East Makueni  | Kyumu     | -1.76243 |       |   |
| 304 | 46 | 18-Apr-17 | Lower East Makueni  | Kyumu     | -1.7934  |       |   |
| 315 | 29 | 18-Apr-17 | Lower East Makueni  | Kisung'ui | -1.75821 |       |   |
| 169 | 2  | #####     | Lower East Machakos | Kithima   | -1.40496 | South | 1 |
| 177 | 10 | #####     | Lower East Machakos | Mithini   | -1.39164 | South | 1 |
| 178 | 11 | #####     | Lower East Machakos | Mithini   | -1.39556 | South | 1 |
| 179 | 12 | #####     | Lower East Machakos | Mithini   | -1.39164 | South | 1 |
| 180 | 13 | #####     | Lower East Machakos | Uvalini   |          | South | 1 |
| 181 | 14 | #####     | Lower East Machakos | Uvalini   |          | South | 1 |
| 182 | 15 | #####     | Lower East Machakos | Uvalini   |          | South | 1 |
| 183 | 16 | #####     | Lower East Machakos | Uvalini   |          | South | 1 |
| 184 | 17 | #####     | Lower East Machakos | Uvalini   |          | South | 1 |
| 185 | 18 | #####     | Lower East Machakos | Uvalini   |          | South | 1 |
| 186 | 19 | #####     | Lower East Machakos | Mithini   |          | South | 1 |
| 187 | 20 | #####     | Lower East Machakos | Mithini   |          | South | 1 |
| 188 | 21 | #####     | Lower East Machakos | Mithini   |          | South | 1 |
| 190 | 23 | #####     | Lower East Machakos | Uvalini   |          | South | 1 |

|     |    |           |                     |         |          |       |   |
|-----|----|-----------|---------------------|---------|----------|-------|---|
| 193 | 26 | #####     | Lower East Machakos | Kithima | -1.40389 | South | 1 |
| 194 | 27 | #####     | Lower East Machakos | Mithini | 1.392    | South | 1 |
| 195 | 28 | #####     | Lower East Machakos | Mithini | -1.39228 | South | 1 |
| 196 | 29 | #####     | Lower East Machakos | Mithini | -1.39524 | South | 1 |
| 198 | 34 | #####     | Lower East Machakos | Mithini | -1.39584 | South | 1 |
| 199 | 35 | #####     | Lower East Machakos | Mithini | -1.39578 | South | 1 |
| 200 | 36 | #####     | Lower East Machakos | Mithini | -1.38888 | South | 1 |
| 203 | 39 | #####     | Lower East Machakos | Kithima | -1.40426 | South | 1 |
| 204 | 40 | #####     | Lower East Machakos | Kithima | -1.4042  | South | 1 |
| 205 | 41 | #####     | Lower East Machakos | Kithima | -1.40568 | South | 1 |
| 206 | 42 | #####     | Lower East Machakos | Kithima | -1.4059  | South | 1 |
| 210 | 46 | #####     | Lower East Machakos | Kithima | -1.40694 | South | 1 |
| 211 | 47 | #####     | Lower East Machakos | Kithima | -1.40357 | South | 1 |
| 214 | 50 | #####     | Lower East Machakos | Mithini |          | South | 1 |
| 215 | 51 | #####     | Lower East Machakos | Mithini |          | South |   |
| 216 | 52 | #####     | Lower East Machakos | Mithini |          | South | 1 |
| 217 | 53 | #####     | Lower East Machakos | Mithini |          | South | 1 |
| 218 | 1  | 20-Apr-17 | Lower East Kitui    | Kiteta  | -1.75421 |       |   |
| 220 | 3  | 20-Apr-17 | Lower East Kitui    | Kiteta  | -1.75685 |       |   |
| 222 | 5  | 20-Apr-17 | Lower East Kitui    | Kiteta  | -1.75618 |       |   |
| 223 | 6  | 20-Apr-17 | Lower East Kitui    | Kiteta  | -1.75617 |       |   |
| 224 | 7  | 20-Apr-17 | Lower East Kitui    | Kiteta  | -1.75616 |       |   |
| 225 | 8  | 20-Apr-17 | Lower East Kitui    | Kiteta  | -1.75614 |       |   |
| 227 | 10 | 20-Apr-17 | Lower East Kitui    | Kiteta  | -1.75613 |       |   |
| 228 | 11 | 20-Apr-17 | Lower East Kitui    | Kiteta  | -1.75284 |       |   |
| 229 | 12 | 20-Apr-17 | Lower East Kitui    | Kiteta  | -1.7561  |       |   |
| 230 | 13 | 20-Apr-17 | Lower East Kitui    | Kiteta  | -1.75609 |       |   |
| 234 | 18 | 20-Apr-17 | Lower East Kitui    | Kiteta  | -1.75286 |       |   |
| 237 | 21 | 20-Apr-17 | Lower East Kitui    | Kiteta  | -1.75298 |       |   |
| 238 | 22 | 20-Apr-17 | Lower East Kitui    | kiteta  | -1.75406 |       |   |
| 239 | 23 | 20-Apr-17 | Lower East Kitui    | Kiteta  | -1.75302 |       |   |
| 240 | 24 | 20-Apr-17 | Lower East Kitui    | Kiteta  | -1.75326 |       |   |
| 242 | 26 | 20-Apr-17 | Lower East Kitui    | Kiteta  | -1.75606 | South | 1 |
| 246 | 30 | 20-Apr-17 | Lower East Kitui    | UAE     |          |       |   |
| 248 | 32 | 20-Apr-17 | Lower East Kitui    | UAE     |          |       |   |
| 251 | 35 | 20-Apr-17 | Lower East Kitui    | UAE     | -1.84921 | South | 1 |
| 252 | 36 | 20-Apr-17 | Lower East Kitui    | UAE     | -1.79282 | South | 1 |
| 255 | 39 | 20-Apr-17 | Lower East Kitui    | UAE     | -1.825   | South | 1 |
| 256 | 40 | 20-Apr-17 | Lower East Kitui    | UAE     | -1.83645 | South | 1 |
| 257 | 41 | 20-Apr-17 | Lower East Kitui    | UAE     |          |       |   |
| 267 | 51 | 20-Apr-17 | Lower East Kitui    | UAE     |          |       |   |
| 268 | 52 | 20-Apr-17 | Lower East Kitui    | UAE     | -1.82491 | South | 1 |
| 272 | 1  | 18-Apr-17 | Lower East Makueni  | Nthangu | -1.75892 | South | 1 |
| 274 | 3  | 18-Apr-17 | Lower East Makueni  | Nthangu | -1.76023 | South | 1 |
| 275 | 4  | 18-Apr-17 | Lower East Makueni  | Nthangu | -1.75772 | South | 1 |
| 276 | 5  | 18-Apr-17 | Lower East Makueni  | Nthangu | -1.75702 | South | 1 |
| 277 | 6  | 18-Apr-17 | Lower East Makueni  | Nthangu | -1.75704 | South | 1 |

|     |    |           |                     |             |          |        |   |
|-----|----|-----------|---------------------|-------------|----------|--------|---|
| 278 | 7  | 18-Apr-17 | Lower East Makueni  | Nthangu     | -1.75966 | South  | 1 |
| 279 | 11 | 18-Apr-17 | Lower East Makueni  | Nthangu     | -1.76057 | South  | 1 |
| 280 | 13 | 18-Apr-17 | Lower East Makueni  | Nthangu     | -1.75905 | South  | 1 |
| 281 | 14 | 18-Apr-17 | Lower East Makueni  | Nthangu     | -1.75895 | South  | 1 |
| 283 | 16 | 18-Apr-17 | Lower East Makueni  | Nthangu     | -1.75977 | South  | 1 |
| 285 | 18 | 18-Apr-17 | Lower East Makueni  | Nthangu     | -1.75982 | South  | 1 |
| 286 | 19 | 18-Apr-17 | Lower East Makueni  | Nthangu     | -1.76176 | South  | 1 |
| 287 | 20 | 18-Apr-17 | Lower East Makueni  | Nthangu     | -1.76182 | South  | 1 |
| 288 | 21 | 18-Apr-17 | Lower East Makueni  | Nthangu     | -1.76242 | South  | 1 |
| 289 | 22 | 18-Apr-17 | Lower East Makueni  | Nthangu     | -1.76286 | South  | 1 |
| 290 | 23 | 18-Apr-17 | Lower East Makueni  | Nthangu     | -1.76319 | South  | 1 |
| 292 | 9  | 18-Apr-17 | Lower East Makueni  | Thangu      | -1.7593  | South  | 1 |
| 294 | 12 | 18-Apr-17 | Lower East Makueni  | Thangu      | -1.75974 | South  | 1 |
| 297 | 27 | 18-Apr-17 | Lower East Makueni  | Kyumu       | -1.78256 |        |   |
| 299 | 29 | 18-Apr-17 | Lower East Makueni  | Kyumu       | -1.76485 |        |   |
| 300 | 42 | 18-Apr-17 | Lower East Makueni  | Kyumu       | -1.78235 |        |   |
| 302 | 44 | 18-Apr-17 | Lower East Makueni  | Kyumu       | -1.76245 |        |   |
| 305 | 47 | 18-Apr-17 | Lower East Makueni  | Kyumu       | -1.78351 |        |   |
| 306 | 48 | 18-Apr-17 | Lower East Makueni  | Kyumu       | -1.7835  |        |   |
| 307 | 49 | 18-Apr-17 | Lower East Makueni  | Kyumu       |          |        |   |
| 308 | 50 | 18-Apr-17 | Lower East Makueni  | Kyumu       | -1.74184 |        |   |
| 310 | 8  | 18-Apr-17 | Lower East Makueni  | Kisyongai   | -1.781   |        |   |
| 312 | 35 | 18-Apr-17 | Lower East Makueni  | Kisyongai   | -1.77847 |        |   |
| 313 | 1  | 18-Apr-17 | Lower East Makueni  | Kisyungii   |          |        |   |
| 314 | 5  | 18-Apr-17 | Lower East Makueni  | Kisyungii   | -1.7528  |        |   |
| 316 | 36 | 18-Apr-17 | Lower East Makueni  | Kisyungii   | -1.781   |        |   |
| 317 | 37 | 18-Apr-17 | Lower East Makueni  | Kisyungii   | -2.0655  |        |   |
| 318 | 38 | 18-Apr-17 | Lower East Makueni  | Kisyungii   | -1.76555 |        |   |
| 197 | 33 | #####     | Lower East Machakos | Mithini     |          | South  |   |
| 68  | 18 | 22-Apr-17 | Rift valley         | Nakuru      | -0.24926 | South  | 0 |
| 52  | 2  | 22-Apr-17 | Rift valley         | Nakuru      | -0.25023 | South  | 0 |
| 57  | 7  | 22-Apr-17 | Rift valley         | Nakuru      | -0.24782 | South  | 0 |
| 70  | 20 | 22-Apr-17 | Rift valley         | Nakuru      | -0.24867 | South  | 0 |
| 74  | 24 | 22-Apr-17 | Rift valley         | Nakuru      | -2.24852 | South  | 0 |
| 80  | 30 | 22-Apr-17 | Rift valley         | Nakuru      | -0.25847 | South  | 0 |
| 87  | 37 | 22-Apr-17 | Rift valley         | Nakuru      | -0.2602  | South  | 0 |
| 102 | 2  | 28-Apr-17 | Rift valley         | Nakuru      | -0.20697 | South  | 0 |
| 112 | 12 | 1-May-17  | Rift valley         | Nakuru      | -0.20823 | South  | 0 |
| 114 | 14 | 1-May-17  | Rift valley         | Nakuru      | -0.20313 | South  | 0 |
| 192 | 25 | #####     | Lower East Machakos | Kithima     | -1.40422 | South  | 1 |
| 32  | 32 | 2-May-17  | Rift valley         | Bomet       | -0.92294 | South  | 0 |
| 67  | 17 | 22-Apr-17 | Rift valley         | Nakuru      | -0.24888 | South  | 0 |
| 75  | 25 | 22-Apr-17 | Rift valley         | Nakuru      | -0.25111 | South  | 0 |
| 162 | 47 | 2-May-17  | Rift valley         | Trans-nzoia | 1.01302  | Laboot |   |
| 164 | 49 | 2-May-17  | Rift valley         | Trans-nzoia | 1.01134  | Laboot | 1 |
| 263 | 47 | 20-Apr-17 | Lower East Kitui    | UAE         | -1.82491 | South  | 1 |
| 92  | 42 | 22-Apr-17 | Rift valley         | Nakuru      | -0.25916 | South  | 0 |

|     |    |           |             |             |            |          |       |   |
|-----|----|-----------|-------------|-------------|------------|----------|-------|---|
| 50  | 50 | 29-Apr-17 | Rift valley | Bomet       | Chesambai  | -0.8653  |       |   |
| 60  | 10 | 22-Apr-17 | Rift valley | Nakuru      | Waldai     | -0.24829 | South | 0 |
| 69  | 19 | 22-Apr-17 | Rift valley | Nakuru      | Waldai     | -0.24952 | South | 0 |
| 101 | 1  | 28-Apr-17 | Rift valley | Nakuru      | Chepseon   | -0.20516 | South | 0 |
| 105 | 5  | 29-Apr-17 | Rift valley | Nakuru      | Chepseon   | -0.20342 | South | 0 |
| 110 | 10 | 1-May-17  | Rift valley | Nakuru      | Chepseon   | -0.20725 | South | 0 |
| 133 | 18 | 2-May-17  | Rift valley | Trans-nzoia | Chepkaitit | 1.00397  | North | 1 |
| 117 | 2  | 2-May-17  | Rift valley | Trans-nzoia | Chepkaitit | 1.01604  | North | 1 |
| 71  | 21 | 22-Apr-17 | Rift valley | Nakuru      | Waldai     | -0.24954 | South | 0 |
| 85  | 35 | 22-Apr-17 | Rift valley | Nakuru      | Saptet     | -0.26026 | South | 5 |
| 89  | 39 | 22-Apr-17 | Rift valley | Nakuru      | Saptet     | -0.26226 | South | 0 |
| 4   | 4  | 29-Apr-17 | Rift valley | Bomet       | Kapchumba  | -0.99871 | South | 0 |
| 64  | 14 | 22-Apr-17 | Rift valley | Nakuru      | Waldai     | -0.2497  | South | 0 |
| 84  | 34 | 22-Apr-17 | Rift valley | Nakuru      | Saptet     | -0.26078 | South | 0 |
| 125 | 10 | 2-May-17  | Rift valley | Trans-nzoia | Chepkaitit | 1.00604  | North | 1 |
| 135 | 20 | 2-May-17  | Rift valley | Trans-nzoia | Chepkaitit | 1.00456  | North | 1 |
| 160 | 45 | 2-May-17  | Rift valley | Trans-nzoia | Laboot     | 1.01134  | North | 1 |
| 163 | 48 | 2-May-17  | Rift valley | Trans-nzoia | Laboot     | 1.01207  | North | 1 |
| 207 | 43 | #####     | Lower East  | Machakos    | Kithima    | -1.40632 | South | 1 |
| 301 | 43 | 18-Apr-17 | Lower East  | Makueni     | Kyumu      | -1.76649 |       |   |
| 47  | 47 | 29-Apr-17 | Rift valley | Bomet       | Chesambai  | -0.8653  |       |   |
| 63  | 13 | 22-Apr-17 | Rift valley | Nakuru      | Waldai     |          |       |   |
| 66  | 16 | 22-Apr-17 | Rift valley | Nakuru      | Waldai     | -0.24905 | South | 0 |
| 91  | 41 | 22-Apr-17 | Rift valley | Nakuru      | Saptet     | -0.2576  | South | 0 |
| 98  | 48 | 22-Apr-17 | Rift valley | Nakuru      | Waldai     | -0.25215 | South | 0 |
| 131 | 16 | 2-May-17  | Rift valley | Trans-nzoia | Chepkaitit | 1.00213  | North | 1 |
| 140 | 25 | 2-May-17  | Rift valley | Trans-nzoia | Chepkaitit | 1.00472  | North | 1 |
| 174 | 7  | #####     | Lower East  | Machakos    | Mithini    | -1.39163 | South | 1 |
| 116 | 1  | 2-May-17  | Rift valley | Trans-nzoia | Chepkaitit | 1.04605  | North | 1 |
| 37  | 37 | 1-May-17  | Rift valley | Bomet       | Kapolesobe | -0.93177 | South | 0 |
| 40  | 40 | 1-May-17  | Rift valley | Bomet       | Kapolesobe | -0.92421 | South | 0 |
| 168 | 1  | #####     | Lower East  | Machakos    | Nzoweni    | -1.48543 | South | 1 |
| 176 | 9  | #####     | Lower East  | Machakos    | Mithini    | -1.39209 | South | 1 |
| 319 | 39 | 18-Apr-17 | Lower East  | Makueni     | Kisungii   | -1.74014 |       |   |
| 73  | 23 | 22-Apr-17 | Rift valley | Nakuru      | Waldai     | -0.25021 | South | 0 |
| 77  | 27 | 22-Apr-17 | Rift valley | Nakuru      | Saptet     | -0.25225 | South | 0 |
| 129 | 14 | 2-May-17  | Rift valley | Trans-nzoia | Chepkaitit | 1.00491  | North | 1 |
| 79  | 29 | 22-Apr-17 | Rift valley | Nakuru      | Saptet     | -0.25548 | South | 0 |
| 88  | 38 | 22-Apr-17 | Rift valley | Nakuru      | Saptet     | -0.25424 | South | 0 |
| 94  | 44 | 22-Apr-17 | Rift valley | Nakuru      | Saptet     | -0.25946 | South | 5 |
| 48  | 48 | 29-Apr-17 | Rift valley | Bomet       | Chesambai  | -0.8553  |       |   |
| 54  | 4  | 22-Apr-17 | Rift valley | Nakuru      | Waldai     | -0.2506  | South | 0 |
| 61  | 11 | 22-Apr-17 | Rift valley | Nakuru      | Waldai     | -0.24754 | South | 0 |
| 65  | 15 | 22-Apr-17 | Rift valley | Nakuru      | Waldai     | -0.25017 | South | 0 |
| 86  | 36 | 22-Apr-17 | Rift valley | Nakuru      | Saptet     | -0.22143 |       |   |
| 93  | 43 | 22-Apr-17 | Rift valley | Nakuru      | Saptet     | -0.2629  | South | 0 |
| 106 | 6  | 29-Apr-17 | Rift valley | Nakuru      | Chepseon   | -0.20291 | South | 0 |

|     |    |           |             |             |            |          |       |   |
|-----|----|-----------|-------------|-------------|------------|----------|-------|---|
| 113 | 13 | 29-Apr-17 | Rift valley | Nakuru      | Chepseon   | -0.20938 | South | 0 |
| 136 | 21 | 2-May-17  | Rift valley | Trans-nzoia | Chepkaitit | 1.00197  | North | 1 |
| 149 | 34 | 2-May-17  | Rift valley | Trans-nzoia | Sinendet   | 1.01736  |       |   |
| 270 | 32 | 18-Apr-17 | Lower East  | Makueni     | Kiatine    | -1.781   |       |   |
| 55  | 5  | 22-Apr-17 | Rift valley | Nakuru      | Waldai     | -0.25024 | South | 0 |
| 111 | 11 | 1-May-17  | Rift valley | Nakuru      | Chepseon   | -0.20786 | South | 0 |
| 122 | 7  | 2-May-17  | Rift valley | Trans-nzoia | Chepkaitit | 1.00668  | North | 1 |
| 49  | 49 | 29-Apr-17 | Rift valley | Bomet       | Chesambai  | -0.8643  |       |   |
| 59  | 9  | 22-Apr-17 | Rift valley | Nakuru      | Waldai     | -0.2482  | South | 0 |
| 143 | 28 | 2-May-17  | Rift valley | Trans-nzoia | Laboot     | 1.01257  |       |   |
| 148 | 33 | 2-May-17  | Rift valley | Trans-nzoia | Sinendet   | 1.01705  |       |   |
| 90  | 40 | 22-Apr-17 | Rift valley | Nakuru      | Saptet     | -0.25546 | South | 0 |
| 170 | 3  | #####     | Lower East  | Machakos    | Mithin     | -1.39355 | South | 1 |
| 83  | 33 | 22-Apr-17 | Rift valley | Nakuru      | Saptet     | -2.6085  | South | 0 |
| 45  | 45 | 1-May-17  | Rift valley | Bomet       | Kaplombe   | -0.7816  | South | 0 |
| 309 | 31 | 18-Apr-17 | Lower East  | Makueni     | Kisionge   | -1.75631 |       |   |
| 172 | 5  | #####     | Lower East  | Machakos    | Mithini    | -1.3924  | South | 1 |
| 266 | 50 | 20-Apr-17 | Lower East  | Kitui       | UAE        | -1.80414 | South | 1 |
| 284 | 17 | 18-Apr-17 | Lower East  | Makueni     | Nthangu    | -1.75923 | South | 1 |
| 291 | 8  | 18-Apr-17 | Lower East  | Makueni     | Thangu     | -1.75925 | South | 1 |
| 311 | 34 | 18-Apr-17 | Lower East  | Makueni     | Kisyongai  |          |       |   |
| 96  | 46 | 22-Apr-17 | Rift valley | Nakuru      | Saptet     | -0.26232 | South | 0 |
| 97  | 47 | 22-Apr-17 | Rift valley | Nakuru      | Saptet     | -0.2618  | South | 0 |
| 103 | 3  | 28-Apr-17 | Rift valley | Nakuru      | Chepseon   | -0.20546 | South | 0 |
| 51  | 1  | 22-Apr-17 | Rift valley | Nakuru      | Waldai     | -0.25143 | South | 0 |
| 56  | 6  | 22-Apr-17 | Rift valley | Nakuru      | Waldai     | -0.2477  | South | 0 |
| 58  | 8  | 22-Apr-17 | Rift valley | Nakuru      | Waldai     | -0.24804 | South | 0 |
| 62  | 12 | 22-Apr-17 | Rift valley | Nakuru      | Waldai     | -0.24831 | South | 0 |
| 72  | 22 | 22-Apr-17 | Rift valley | Nakuru      | Waldai     | -0.24977 | South | 0 |
| 118 | 3  | 2-May-17  | Rift valley | Trans-nzoia | Chepkaitit | 1.01513  | North | 1 |
| 123 | 8  | 2-May-17  | Rift valley | Trans-nzoia | Chepkaitit | 1.00787  | North | 1 |
| 166 | 51 | 2-May-17  | Rift valley | Trans-nzoia | Laboot     | 1.00912  | North | 1 |
| 167 | 52 | 2-May-17  | Rift valley | Trans-nzoia | Laboot     | 1.0095   | North | 1 |

| gprsmn | gpsdoublet | VAR00012 | VAR00013 | VAR00014 | VAR00015 | VAR00016 | age | gender    |
|--------|------------|----------|----------|----------|----------|----------|-----|-----------|
|        |            | 34.90983 |          |          |          |          |     | 43 Male   |
| 48     | 13.212     | 38.17234 | East     | 38       | 10       | 20.418   |     | 37 Female |
| 15     | 41.61      | 35.83393 | East     | 35       | 50       | 2.136    |     | 27 Female |
| 53     | 9.71412    | 35.20357 | East     | 35       | 12       | 12.85452 |     | 34 Male   |
| 1      | 43.104     | 35.08676 | East     | 35       | 5        | 12.35328 |     | 32 Female |
| 56     | 55.23612   | 35.16771 | East     | 35       | 10       | 3.747    |     | 38 Female |
| 53     | 9.83292    | 35.20358 | East     | 35       | 12       | 12.8916  |     | 25 Female |
| 52     | 19.08552   | 35.23321 | East     | 35       | 13       | 59.57148 |     | 32 Male   |
| 50     | 14.46576   | 35.09753 | East     | 35       | 5        | 51.12564 |     | 53 Female |
| 50     | 14.47872   | 35.09753 | East     | 35       | 5        | 51.10548 |     | 33 Female |
| 48     | 31.02588   | 35.18686 | East     | 35       | 11       | 12.70356 |     | 36 Male   |
| 50     | 39.46848   | 35.09952 | East     | 35       | 5        | 58.26624 |     | 30 Female |
| 52     | 34.62564   | 35.22345 | East     | 35       | 13       | 4.42288  |     | 27 Female |
| 56     | 55.23612   | 35.16771 | East     | 35       | 10       | 3.747    |     | 59 Female |
| 57     | 50.5012    | 35.1225  | East     | 35       | 7        | 20.09064 |     | 27 Male   |
| 46     | 47.6184    | 35.22194 | East     | 35       | 13       | 18.98256 |     | 48 Female |
| 57     | 50.5782    | 35.19029 | East     | 35       | 11       | 25.05576 |     | 34 Male   |
| 55     | 22.61136   | 35.12246 | East     | 35       | 7        | 20.8542  |     | 39 Female |
| 57     | 40.8384    | 35.19273 | East     | 35       | 11       | 33.81144 |     | 60 Male   |
| 54     | 43.97508   | 35.20348 | East     | 35       | 12       | 12.52404 |     | 33 Male   |
| 55     | 5.56104    | 36.15993 | East     | 35       | 9        | 35.76096 |     | 59 Female |
| 56     | 29.01984   | 35.15268 | East     | 35       | 9        | 9.65376  |     | 65 Female |
| 56     | 21.59304   | 35.16046 | East     | 35       | 9        | 37.6639  |     | 28 Female |
| 59     | 14.47872   | 35.09753 | East     | 35       | 5        | 57.10548 |     | 27 Male   |
| 52     | 19.08552   | 35.23321 | East     | 35       | 13       | 59.57148 |     | 24 Female |
| 50     | 39.6636    | 35.09956 | East     | 35       | 11       | 12.7288  |     | 28 Male   |
| 15     | 39.57      | 35.83457 | East     | 35       | 50       | 4.458    |     | 42 Male   |
| 15     | 37.326     | 35.83244 | East     | 35       | 49       | 56.778   |     | 25 Female |
|        |            | 35.83371 |          |          |          |          |     | 39 Female |
| 15     | 4.688      | 35.83415 | East     | 35       | 50       | 2.934    |     | 54 Female |
| 12     | 17         | 35.83401 | East     | 35       | 50       | 2        |     | 63 Female |
| 0      | 21.738     | 34.92139 | East     | 34       | 55       | 16.932   |     | 41 Female |
| 0      | 19.182     | 34.9211  | East     | 34       | 55       | 15.966   |     | 36 Male   |
| 0      | 8.02162    | 34.92374 | East     | 34       | 55       | 25.93576 |     | 58 Male   |
| 0      | 17.48872   | 34.92205 | East     | 34       | 55       | 19.5915  |     | 25 Female |
|        |            | 34.9065  |          |          |          |          |     | 27 Male   |
| 0      | 43.296     | 34.91682 | East     | 34       | 55       | 0.558    |     | 40 Female |
| 0      | 10.97028   | 35.11092 | East     | 35       | 6        | 39.32244 |     | 43 Female |
| 58     | 25.2948    | 35.14037 | East     | 35       | 8        | 25.34316 |     | 52 Female |
| 58     | 39.27      | 35.08648 | East     | 35       | 8        | 9.55284  |     | 57 Male   |
| 57     | 7.57008    | 35.16105 | East     | 35       | 9        | 39.78324 |     | 53 Female |
| 56     | 50.91468   | 35.16576 | East     | 35       | 9        | 56.72376 |     | 50 Male   |
| 55     | 30.21528   | 35.19691 | East     | 35       | 11       | 48.86664 |     | 22 Male   |
| 53     | 9.58272    | 35.20355 | East     | 35       | 12       | 12.7668  |     | 32 Male   |
| 53     | 5.70624    | 35.20392 | East     | 35       | 12       | 14.1246  |     | 29 Female |
| 50     | 14.46576   | 35.09753 | East     | 35       | 5        | 51.12564 |     | 42 Male   |



|    |          |          |      |    |    |          |    |        |
|----|----------|----------|------|----|----|----------|----|--------|
| 57 | 50.5782  | 35.19029 | East | 35 | 11 | 25.05516 | 34 | Female |
| 53 | 9.58272  | 35.20355 | East | 35 | 12 | 12.76668 | 29 | Male   |
| 57 | 40.8384  | 35.19273 | East | 35 | 11 | 33.81144 | 49 | Female |
| 56 | 32.61624 | 35.15535 | East | 35 | 9  | 19.24884 | 34 | Female |
| 56 | 55.3742  | 35.1227  | East | 35 | 8  | 9.3743   | 42 | Female |
| 59 | 54.96648 | 35.11311 | East | 35 | 6  | 47.19816 | 37 | Female |
| 57 | 50.5782  | 35.19029 | East | 35 | 11 | 25.05576 | 22 | Female |
| 57 | 41.56452 | 35.19307 | East | 35 | 11 | 35.0592  | 64 | Female |
| 46 | 59.9736  | 35.2775  | East | 35 | 16 | 38.99172 | 26 | Male   |
| 17 | 2.431    | 35.62991 |      | 35 | 49 | 45.106   | 35 | Female |
| 15 | 46.44    | 35.83352 | East | 35 | 50 | 0.666    | 30 | Female |
| 15 | 33.87    | 35.83232 | East | 35 | 49 | 56.346   | 25 | Female |
| 12 | 14       | 35.83233 | East | 35 | 49 | 56       | 44 | Female |
| 12 | 16       | 35.83293 | East | 35 | 49 | 58       | 74 | Female |
| 12 | 15       | 35.83348 | East | 35 | 50 | 0        | 37 | Female |
| 12 | 24       | 35.83106 | East | 35 | 49 | 51       | 32 | Male   |
| 0  | 21.732   | 34.92136 | East | 34 | 55 | 16.902   | 18 | Male   |
| 0  | 1.818    | 34.92878 | East | 34 | 55 | 42.18    | 32 | Female |
| 0  | 18.306   | 34.92164 | East | 34 | 55 | 17.922   | 31 | Female |
| 0  | 19.25998 | 34.92282 | East | 34 | 55 | 22.16949 | 51 | Female |
| 0  | 8.46018  | 34.92349 | East | 34 | 55 | 24.51986 | 70 | Female |
| 0  | 7.38     | 34.92411 | East | 34 | 55 | 26.808   | 69 | Female |
| 0  | 9.85588  | 34.92269 | East | 34 | 55 | 21.69931 | 37 | Female |
| 0  | 3.92435  | 34.92435 | East | 34 | 55 | 29.66256 | 54 | Female |
|    |          | 34.9135  |      |    |    |          | 37 | Male   |
|    |          | 34.9115  |      |    |    |          | 35 | Female |
|    |          | 34.91114 |      |    |    |          | 37 | Male   |
|    |          | 34.91096 |      |    |    |          | 44 | Male   |
|    |          | 34.91063 |      |    |    |          | 40 | Male   |
|    |          |          |      |    |    |          | 45 | Male   |
|    |          |          |      |    |    |          | 50 | Male   |
|    |          | 34.91242 |      |    |    |          | 46 | Female |
| 0  | 37.098   | 34.91799 | East | 34 | 55 | 4.77     | 65 | Female |
| 0  | 39.12    | 34.91772 | East | 34 | 55 | 3.798    | 27 | Male   |
| 0  | 39.324   | 34.41724 | East | 34 | 55 | 2.076    | 33 | Male   |
| 0  | 40.632   | 34.9174  | East | 34 | 55 | 2.172    | 33 | Female |
| 0  | 42.516   | 34.91736 | East | 34 | 55 | 2.484    | 45 | Male   |
| 0  | 39.48    | 34.9205  | East | 34 | 55 | 13.794   | 50 | Male   |
| 48 | 9.798    | 38.16785 | East | 38 | 10 | 4.266    | 49 | Female |
|    |          | 38.1076  |      |    |    |          | 65 | Female |
|    |          | 38.10665 |      |    |    |          | 43 | Female |
|    |          | 38.1064  |      |    |    |          | 32 | Female |
| 24 | 14.964   | 37.24895 | East | 37 | 14 | 36.232   | 46 | Female |
| 30 | 7.81     | 37.26015 | East | 37 | 15 | 38.433   | 73 | Male   |
| 24 | 18.949   | 37.27117 | East | 37 | 21 | 4.514    | 65 | Male   |
| 30 | 6.21864  |          | East | 37 | 15 | 23.24376 | 39 | Female |
| 30 | 6.21864  |          | East | 37 | 15 | 23.24376 | 55 | Female |

|    |          |          |      |    |       |          |           |
|----|----------|----------|------|----|-------|----------|-----------|
| 24 | 14.838   |          | East | 37 | 15    | 12.114   | 91 Female |
| 24 | 20.88    |          | East | 37 | 15    | 9.522    | 50 Female |
| 24 | 13.62    | 37.25245 | East | 37 | 15    | 10.632   | 28 Female |
| 24 | 28.134   |          | East | 37 | 26    | 11.844   | 26 Female |
| 24 | 10       | 2.722    | East | 37 | 15    | 8.718    | 30 Female |
| 23 | 30.44    | 37.25172 | East | 37 | 15    | 6.142    | 33 Male   |
|    |          | 38.10762 |      |    |       |          | 26 Male   |
|    |          | 38.10532 |      |    |       |          | 35 Male   |
|    |          | 38.1064  |      |    |       |          | 37 Female |
|    |          | 38.10754 |      |    |       |          | 41 Male   |
|    |          | 38.10552 |      |    |       |          | 61 Female |
| 45 | 18       | 38.15739 | East | 38 | 9     | 26.598   | 33 Male   |
|    |          |          |      |    |       |          | 35 Female |
|    |          |          |      |    |       |          | 44 Female |
| 48 | 14.886   | 38.6535  | East | 38 | 9     | 55.48    | 80 Female |
| 50 | 11.22684 | 38.19915 | East | 38 | 11    | 56.93892 | 82 Female |
| 50 | 57.16716 | 38.20754 | East | 38 | 12    | 27.35    | 18 Female |
| 48 | 9.096    | 38.16768 | East | 38 | 10    | 3.63     | 21 Male   |
|    |          |          |      |    |       |          | 42 Female |
|    |          |          |      |    |       |          | 21 Male   |
|    |          |          |      |    |       |          | 32 Female |
|    |          |          |      |    |       |          | 18 Female |
|    |          |          |      |    |       |          | 25 Female |
|    |          | 42.6402  |      |    |       |          | 35 Male   |
| 45 | 36.972   | 37.61088 | East | 37 | 36    | 39.174   | 65 Female |
| 45 | 30.876   | 37.61594 | East | 37 | 36    | 57.402   | 43 Male   |
| 45 | 35.208   | 37.61384 | East |    | 37.36 | 49.806   | 26 Male   |
|    |          | 37.58128 | East |    |       |          | 19 Female |
|    |          | 37.62151 |      |    |       |          | 73 Male   |
|    |          | 37.55459 |      |    |       |          | 60 Male   |
|    |          | 37.66252 |      |    |       |          | 50 Female |
|    |          | 37.6521  |      |    |       |          | 65 Female |
|    |          | 37.56549 |      |    |       |          | 40 Female |
| 24 | 17.868   | 37.25117 | East | 37 | 15    | 4.218    | 32 Male   |
| 23 | 29.91    | 37.25267 | East | 37 | 15    | 9.577    | 28 Female |
| 23 | 44.016   | 37.25214 | East | 37 | 15    | 7.11     | 29 Female |
| 23 | 29.91    | 37.25266 | East | 37 | 15    | 9.588    | 34 Female |
| 30 | 6.21864  | 37.15    |      |    |       | 15.24376 | 70 Male   |
| 30 | 16.2186  |          | East | 37 |       | 15.24376 | 60 Female |
| 30 | 6        |          | East | 37 | 15    | 23       | 58 Female |
| 30 | 6.21864  |          | East | 37 | 15    | 23       | 60 Female |
| 30 | 6.21864  |          | East | 37 | 15    | 23       | 28 Female |
| 30 | 6        |          | East | 37 | 15    | 23       | 28 Male   |
| 30 | 6.21864  |          | East | 37 | 15    | 23       | 46 Female |
| 30 | 6.21864  |          | East | 37 | 15    | 23.2476  | 54 Female |
| 30 | 6.21864  |          | East | 37 | 15    | 23.24376 | 65 Female |
| 30 | 6        |          | East | 37 | 15    | 23       | 27 Female |

|    |          |          |      |         |       |          |    |        |
|----|----------|----------|------|---------|-------|----------|----|--------|
| 24 | 13.992   | 37.25181 | East | 37      | 15    | 6.504    | 28 | Female |
| 23 | 31.194   | 37.25194 | East | 37      | 15    | 6.996    | 35 | Male   |
| 23 | 32.208   | 37.25153 | East | 37      | 15    | 5.496    | 28 | Male   |
| 23 | 42.882   | 37.25199 | East | 37      | 15    | 7.17     | 70 | Male   |
| 23 | 45.904   | 37.25206 | East | 37      | 15    | 7.484    | 35 | Female |
| 23 | 44.826   | 37.25202 | East | 37      | 15    | 7.254    | 70 | Male   |
| 23 | 19.98    | 37.24363 | East | 37      | 14    | 37.011   | 29 | Female |
| 24 | 15.3     | 37.25346 | East | 37      | 15    | 12.444   | 65 | Male   |
| 24 | 15.12    | 37.2303  | East | 37      | 15    | 10.902   | 55 | Male   |
| 24 | 20.466   | 37.25252 | East | 37      | 15    | 4.762    | 34 | Male   |
| 24 | 21.234   | 37.25234 | East | 37      | 15    | 8.24     | 36 | Male   |
| 24 | 24.972   |          | East | 37      | 15    | 2.208    | 36 | Female |
| 24 | 12.84    |          | East | 37      | 15    | 8.146    | 70 | Male   |
| 30 | 6.21864  |          | East | 37      | 15    | 23.24316 | 63 | Female |
|    |          |          |      |         |       |          | 33 | Female |
| 30 | 6.21864  |          | East | 37.1523 |       |          | 34 | Female |
| 31 | 6.3151   |          | East | 37.1824 |       |          | 39 | Male   |
|    |          | 38.1066  |      |         |       |          | 68 | Female |
|    |          | 38.10769 |      |         |       |          | 45 | Female |
|    |          | 38.10756 |      |         |       |          | 30 | Female |
|    |          | 38.10755 |      |         |       |          | 42 | Male   |
|    |          | 38.10756 |      |         |       |          | 39 | Male   |
|    |          | 38.10755 |      |         |       |          | 33 | Male   |
|    |          | 38.10755 |      |         |       |          | 38 | Female |
|    |          | 38.10471 |      |         |       |          | 32 | Male   |
|    |          | 38.10755 |      |         |       |          | 80 | Male   |
|    |          | 38.10755 |      |         |       |          | 60 | Male   |
|    |          | 38.10545 |      |         |       |          | 82 | Male   |
|    |          | 38.10575 |      |         |       |          | 53 | Female |
|    |          | 38.10653 |      |         |       |          | 46 | Female |
|    |          | 38.10581 |      |         |       |          | 30 | Male   |
|    |          | 38.1059  |      |         |       |          | 23 | Male   |
| 45 | 21.834   | 38.10759 | East | 38      | 6     | 27.318   | 71 | Male   |
|    |          |          |      |         |       |          | 40 | Male   |
|    |          |          |      |         |       |          | 30 | Female |
| 50 | 57.17    | 38.20759 | East | 38      | 12    | 27.33    | 27 | Female |
| 47 | 34.146   |          |      |         | 38.16 | 24       | 31 | Male   |
| 49 | 29.68    | 38.1899  | East | 38      | 11    | 23.62    | 27 | Male   |
| 50 | 11.227   | 38.14915 | East | 38      | 11    | 56.94    | 37 | Female |
|    |          |          |      |         |       |          | 22 | Male   |
|    |          |          |      |         |       |          | 66 | Female |
| 49 | 29.68428 | 38.18989 | East | 38      | 11    | 23.6202  | 30 | Female |
| 45 | 32.118   | 37.60972 | East | 37      | 36    | 2        | 45 | Female |
| 45 | 37.494   | 37.61132 | East | 37      | 36    | 40.788   | 40 | Female |
| 45 | 27.788   | 37.61202 |      | 37      | 36    | 43.278   | 45 | Male   |
| 45 | 25.44    | 37.61252 | East | 37      | 36    | 45.084   | 22 | Female |
| 45 | 25.332   | 37.61247 | East |         | 37.36 | 44.796   | 26 | Female |

|    |          |          |      |    |    |         |    |        |
|----|----------|----------|------|----|----|---------|----|--------|
| 45 | 34.782   | 37.61226 | East | 37 | 36 | 44.148  | 55 | Male   |
| 45 | 38.136   | 37.61501 | East | 37 | 36 | 54.042  | 53 | Female |
| 45 | 32.592   | 37.61552 | East | 37 | 36 | 55.812  | 86 | Female |
| 45 | 32.208   | 37.6162  | East | 37 | 36 | 58.308  | 64 | Male   |
| 45 | 35.172   | 37.61533 | East | 37 | 36 | 55.248  | 45 | Female |
| 45 | 35.382   | 37.61531 | East | 3  | 36 | 55.104  | 23 | Male   |
| 45 | 42.288   | 37.61545 | East | 37 | 36 | 5.626   | 65 | Female |
| 45 | 45.9     | 37.61524 | East | 37 | 36 | 54.984  | 27 | Female |
| 45 | 44.694   | 37.61496 | East | 37 | 36 | 53.874  | 32 | Female |
| 45 | 46.278   | 37.61448 | East | 37 | 36 | 52.128  | 38 | Female |
| 45 | 47.99    | 37.61507 | East | 37 | 36 | 54.114  | 38 | Female |
| 45 | 33.48    | 37.61375 | East | 37 | 36 | 49.488  | 30 | Male   |
| 45 | 35.082   | 37.615   | East | 37 | 36 | 54.006  | 44 | Female |
|    |          | 37.63162 |      |    |    |         | 41 | Female |
|    |          | 37.58482 |      |    |    |         | 30 | Female |
|    |          | 37.62151 |      |    |    |         | 35 | Female |
|    |          | 37.63456 |      |    |    |         | 45 | Male   |
|    |          | 37.63215 |      |    |    |         | 35 | Female |
|    |          | 37.6223  |      |    |    |         | 46 | Male   |
|    |          |          |      |    |    |         | 26 | Male   |
|    |          | 37.56134 |      |    |    |         | 37 | Female |
|    |          | 37.62146 |      |    |    |         | 52 | Male   |
|    |          | 37.59807 |      |    |    |         | 65 | Male   |
|    |          |          |      |    |    |         | 59 | Male   |
|    |          | 37.58305 |      |    |    |         | 34 | Male   |
|    |          | 37.62146 |      |    |    |         | 29 | Female |
|    |          | 37.56527 |      |    |    |         | 40 | Female |
|    |          | 37.56527 |      |    |    |         | 89 | Male   |
|    |          |          |      |    |    |         | 35 | Female |
| 14 | 57.546   | 35.82878 | East | 35 | 49 | 43.602  | 18 | Female |
| 15 | 0.834    | 35.82998 |      | 35 | 49 | 47.94   | 51 | Male   |
| 14 | 51.846   | 35.82936 |      | 35 | 49 | 45.678  | 44 | Male   |
| 14 | 55.386   | 35.82898 | East | 35 | 49 | 44.346  | 31 | Female |
| 14 | 54.672   | 35.82905 | East | 35 | 49 | 44.586  | 47 | Male   |
| 15 | 27.354   | 35.833   | East | 35 | 49 | 0.078   | 26 | Female |
| 15 | 36.732   | 35.83522 | East | 35 | 50 | 6.792   | 44 | Female |
| 12 | 25       | 35.83115 | East | 35 | 49 | 52      | 30 | Female |
| 12 | 29       | 35.83323 | East | 35 | 49 | 59      | 42 | Female |
| 12 | 11       | 35.84088 | East | 35 | 50 | 27      | 65 | Female |
| 24 | 5.306    | 37.25006 | East | 37 | 15 | 0.222   | 27 | Male   |
| 55 | 22.60128 | 35.1225  | East | 35 | 7  | 20.0964 | 49 | Female |
| 14 | 56.142   | 35.82892 | East | 35 | 49 | 44.13   | 34 | Female |
| 15 | 3.984    | 35.82969 | East | 35 | 49 | 46.89   | 48 | Female |
|    |          | 34.91876 |      |    |    |         | 26 | Male   |
| 0  | 41.478   | 34.92049 | East | 34 | 55 | 13.554  | 38 | Female |
| 49 | 29.68428 | 38.18989 | East | 38 | 11 | 23.6202 | 40 | Male   |
| 15 | 32.982   | 35.83355 | East | 35 | 50 | 0.78    | 50 | Male   |

|    |          |               |    |    |          |           |
|----|----------|---------------|----|----|----------|-----------|
|    |          | 36.09651      |    |    |          | 51 Female |
| 14 | 53.844   | 35.82194      | 35 | 49 | 47.631   | 51 Male   |
| 14 | 58.266   | 35.82871 East | 35 | 49 | 43.368   | 71 Male   |
| 12 | 18       | 35.83381 East | 35 | 50 | 1        | 42 Female |
| 12 | 12       | 35.83194 East | 35 | 49 | 54       | 30 Female |
| 12 | 26       | 35.83162 East | 35 | 49 | 53       | 58 Male   |
| 0  | 14.28368 | 34.92206 East | 34 | 55 | 19.23914 | 34 Female |
| 0  | 57.762   | 34.324 East   | 34 | 55 | 55.356   | 20 Male   |
| 14 | 58.536   | 35.8287       | 35 | 49 | 43.308   | 54 Male   |
|    |          | 35.83273      |    |    |          | 65 Male   |
| 15 | 44.124   | 35.8339 East  | 35 | 50 | 2.058    | 37 Male   |
| 59 | 55.35384 | 35.11304 East | 35 | 6  | 46.93968 | 56 Female |
| 14 | 58.92    | 35.82863      | 35 | 49 | 43.068   | 24 Male   |
| 15 | 38.814   | 35.83478 East | 35 | 50 | 5.19     | 26 Female |
| 0  | 21.744   | East          | 34 | 55 | 13.536   | 46 Female |
| 0  | 16.41296 | 34.92173 East | 34 | 55 | 18.22449 | 43 Female |
| 0  | 40.818   | 34.91728 East | 34 | 55 | 2.214    | 24 Female |
| 0  | 43.464   | 34.91956 East | 34 | 55 | 10.548   | 34 Female |
| 24 | 22.77    | 37.25197 East | 37 | 15 | 7.026    | 32 Male   |
|    |          | 37.5697       |    |    |          | 22 Male   |
|    |          | 36.19651      |    |    |          | 62 Male   |
|    |          |               |    |    |          | 26 Female |
| 14 | 56.586   | 35.82886 East | 35 | 49 | 43.878   | 21 Female |
| 15 | 27.466   | 35.83326 East | 35 | 49 | 39.724   | 43 Female |
| 15 | 7.728    | 35.83192 East | 35 | 49 | 54.924   | 53 Male   |
| 0  | 7.65599  | 34.92346 East | 34 | 55 | 24.45723 | 30 Female |
| 0  | 16.43712 | 34.92188 East | 34 | 55 | 18.75944 | 54 Female |
| 23 | 28.9     | 37.2526 East  | 37 | 15 | 8.58     | 42 Female |
| 0  | 30.636   | 34.92255 East | 34 | 55 | 21.18    | 56 Male   |
| 55 | 54.3742  | 35.13843 East | 35 | 8  | 18.33072 | 35 Male   |
| 55 | 27.14736 | 35.11639 East | 35 | 6  | 58.99752 | 31 Male   |
| 29 | 7.56     | 37.26015 East | 37 | 15 | 36.546   | 40 Female |
| 23 | 31.524   | 37.25199 East | 37 | 15 | 7.17     | 55 Male   |
|    |          | 37.58128      |    |    |          | 42 Female |
| 15 | 0.678    | 35.83002 East | 35 | 49 | 47.06    | 28 Male   |
| 15 | 8.106    | 35.83493 East | 35 | 50 | 6.468    | 43 Male   |
| 0  | 17.66829 | 34.9224 East  | 34 | 55 | 20.65324 | 38 Male   |
| 15 | 16.722   | 35.83194 East | 35 | 50 | 13.302   | 94 Male   |
| 15 | 15.252   | 35.83505 East | 35 | 50 | 6.174    | 19 Male   |
| 15 | 34.86    | 35.83176 East | 35 | 49 | 59.604   | 20 Female |
|    |          | 35.08651      |    |    |          | 49 Male   |
| 15 | 0.918    | 35.82992      | 33 | 49 | 47.718   | 30 Male   |
| 14 | 50.76    | 35.82946      | 35 | 49 | 46.056   | 38 Female |
| 15 | 1.014    | 35.82842 East | 35 | 49 | 42.33    | 38 Male   |
|    |          | 35.77465      |    |    |          | 54 Female |
| 15 | 42.49    | 35.83372 East | 35 | 50 | 1.386    | 40 Female |
| 12 | 10       | 35.83155 East | 35 | 49 | 53       | 61 Female |

|    |          |          |      |    |       |          |    |        |
|----|----------|----------|------|----|-------|----------|----|--------|
| 12 | 33       | 35.84195 | East | 35 | 50    | 31       | 53 | Male   |
| 0  | 7.08     | 34.92284 | East | 34 | 55    | 25.812   | 50 | Female |
|    |          | 34.91017 |      |    |       |          | 24 | Female |
|    |          | 42.65008 |      |    |       |          | 54 | Female |
| 15 | 0.87     | 35.83001 |      | 35 | 49    | 48.024   | 29 | Female |
| 12 | 28       | 35.83243 | East | 35 | 49    | 56       | 35 | Female |
| 0  | 24.03    | 34.91998 | East | 34 | 55    | 11.94    | 40 | Female |
|    |          | 36.08651 |      |    |       |          | 63 | Female |
| 14 | 53.532   | 35.82922 |      | 35 | 49    | 45.204   | 43 | Female |
|    |          | 34.91713 |      |    |       |          | 32 | Male   |
|    |          | 34.91031 |      |    |       |          | 42 | Male   |
| 15 | 14.65    | 35.83422 | East | 35 | 50    | 1.824    | 29 | Female |
| 23 | 36.792   | 37.25166 | East | 37 | 15    | 5.616    | 22 | Female |
| 15 | 39.06    | 35.83479 | East | 35 | 50    | 5.238    | 40 | Female |
| 46 | 53.77332 | 35.27685 | East | 35 | 16    | 36.64688 | 23 | Male   |
|    |          | 37.58728 |      |    |       |          | 45 | Female |
| 23 | 31.19    | 37.25193 | East | 37 | 15    | 6.99     | 35 | Male   |
| 48 | 14.886   | 38.16535 | East | 38 | 9     | 55.248   | 37 | Male   |
| 45 | 33.24    | 37.61475 | East | 37 | 36    | 53.094   | 42 | Female |
| 45 | 33.24    | 37.6138  | East |    | 37.36 | 49.674   | 29 | Female |
|    |          |          |      |    |       |          | 63 | Male   |
| 15 | 39.48    | 35.8336  | East | 35 | 50    | 0.9818   | 30 | Female |
| 15 | 45.48    | 35.83416 | East | 35 | 50    | 50.297   | 23 | Female |
| 12 | 19       | 35.83369 | East | 35 | 50    | 1        | 30 | Male   |
| 15 | 5.04     |          |      | 35 | 49    | 49.194   | 46 | Female |
| 14 | 51.402   | 35.82941 |      | 35 | 49    | 45.876   | 42 | Female |
| 14 | 52.518   | 35.82928 |      | 35 | 49    | 45.426   | 36 | Male   |
| 14 | 53.91    | 35.82904 |      | 35 | 49    | 44.898   | 52 | Male   |
| 14 | 59.376   | 35.8286  | East | 35 | 49    | 42.978   | 37 | Female |
| 0  | 34.93307 | 54.45614 | East | 34 | 55    | 50.61    | 30 | Male   |
| 0  | 28.326   | 34.91934 | East | 34 | 55    | 9.606    | 34 | Male   |
| 0  | 32.826   | 34.92154 | East | 34 | 55    | 17.382   | 30 | Female |
| 0  | 34.206   | 34.92234 | East | 34 | 55    | 20.43    | 22 | Female |

| education | occupation   | others | produce | land | cultivated | consumpti  | own_prodi | maize_purc |
|-----------|--------------|--------|---------|------|------------|------------|-----------|------------|
| Tertiary  | Employed     | N/A    | Yes     | 5    | 3          | Over 15 Gc | All       | None       |
| Tertiary  | Full time fa | N/A    | Yes     | 5    | 3          | Over 15 Gc | All       | None       |
| Primary   | Full time fa | N/A    | Yes     | 0.25 | 0.25       | Over 15 Gc | None      | All        |
| Tertiary  | Employed     | N/A    | Yes     | 1.1  | 0.7        | Over 15 Gc | All       | None       |
| Primary   | Full time fa | N/A    | Yes     | 3    | 2          | Over 15 Gc | All       | None       |
| Primary   | Full time fa | N/A    | Yes     | 1    | 0.8        | Over 15 Gc | Half      | Half       |
| Secondary | Employed     | N/A    | Yes     | 2    | 2          | Over 15 Gc | All       | None       |
| Secondary | Business m   | N/A    | Yes     | 1    | 1          | Over 15 Gc | All       | None       |
| Tertiary  | Employed     | N/A    | Yes     | 4    | 3          | Over 15 Gc | All       | None       |
| Primary   | Full time fa | N/A    | Yes     | 2    | 1.5        | Over 15 Gc | All       | None       |
| Secondary | Full time fa | N/A    | Yes     | 2    | 2          | Over 15 Gc | Half      | Half       |
| Primary   | Full time fa | N/A    | Yes     | 3    | 2          | Over 15 Gc | All       | None       |
| Primary   | Full time fa | N/A    | Yes     | 1    | 0.5        | Over 15 Gc | All       | None       |
| Primary   | Full time fa | N/A    | Yes     | 3    | 1          | Over 15 Gc | All       | None       |
| Secondary | Business m   | N/A    | Yes     | 1    | 1          | 11-15 Gorc | All       | None       |
| None      | Full time fa | N/A    | Yes     | 3    | 2          | Over 15 Gc | Half      | Half       |
| Primary   | Full time fa | N/A    | Yes     | 1    | 1          | Over 15 Gc | All       | None       |
| Primary   | Business m   | N/A    | Yes     | 2    | 0.5        | 11-15 Gorc | All       | None       |
| Primary   | Full time fa | N/A    | Yes     | 2    | 1          | Over 15 Gc | Half      | Half       |
| Primary   | Full time fa | N/A    | Yes     | 1    | 0.7        | Over 15 Gc | All       | None       |
| None      | Full time fa | N/A    | Yes     | 2    | 2          | Over 15 Gc | All       | None       |
| None      | Full time fa | N/A    | Yes     | 3    | 3          | Over 15 Gc | All       | None       |
| Primary   | Full time fa | N/A    | Yes     | 2    | 1.5        | Over 15 Gc | All       | None       |
| Secondary | Employed     | N/A    | Yes     | 0.5  | 0.5        | 11-15 Gorc | All       | None       |
| Secondary | Employed     | N/A    | Yes     | 2    | 2          | 11-15 Gorc | All       | None       |
| Primary   | Full time fa | N/A    | Yes     | 1    | 1          | Over 15 Gc | All       | None       |
| Secondary | Full time fa | N/A    | Yes     | 0.5  | 1          | Over 15 Gc | Half      | Half       |
| Primary   | Full time fa | N/A    | Yes     | 0.5  | 0.5        | Over 15 Gc | All       | None       |
| Primary   | Full time fa | N/A    | Yes     | 0.25 | 0          | 6-10 Gorog | None      | All        |
| Primary   | Full time fa | N/A    | Yes     | 1.5  | 0.5        | 11-15 Gorc | Half      | None       |
| Primary   | Full time fa | N/A    | Yes     | 0.75 | 0.25       | 11-15 Gorc | Half      | Half       |
| Primary   | Full time fa | N/A    | Yes     | 0.5  | 0.5        | Over 15 Gc | Half      | Half       |
| Primary   | Full time fa | N/A    | Yes     | 0.5  | 0.5        | Over 15 Gc | Half      | Half       |
| Secondary | Full time fa | N/A    | Yes     | 1    | 0.5        | Over 15 Gc | None      | All        |
| Secondary | Full time fa | N/A    | Yes     | 1    | 0.25       | 11-15 Gorc | None      | All        |
| Tertiary  | Full time fa | N/A    | Yes     | 2    | 1          | Over 15 Gc | All       | None       |
| Primary   | Full time fa | N/A    | Yes     | 1.5  | 1          | Over 15 Gc | All       | None       |
| Primary   | Full time fa | N/A    | Yes     | 4    | 3          | Over 15 Gc | All       | None       |
| None      | Full time fa | N/A    | Yes     | 3    | 2          | Over 15 Gc | All       | None       |
| Secondary | Business m   | N/A    | Yes     | 5    | 3          | Over 15 Gc | Half      | Half       |
| Primary   | Full time fa | N/A    | Yes     | 3    | 2          | 11-15 Gorc | All       | None       |
| Secondary | Employed     | N/A    | Yes     | 6    | 4          | Over 15 Gc | All       | None       |
| Primary   | Business m   | N/A    | Yes     | 0.5  | 0.5        | 11-15 Gorc | All       | None       |
| Tertiary  | Employed     | N/A    | Yes     | 5    | 3          | Over 15 Gc | All       | None       |
| Primary   | Full time fa | N/A    | Yes     | 4    | 3          | Over 15 Gc | Half      | Half       |
| Secondary | Employed     | N/A    | Yes     | 3    | 2          | Over 15 Gc | All       | None       |

|           |                          |     |      |                      |      |
|-----------|--------------------------|-----|------|----------------------|------|
| Primary   | Full time fa N/A         | Yes | 1.5  | 1 Over 15 Gc All     | None |
| Primary   | Full time fa N/A         | Yes | 1    | 0.8 11-15 Gorc All   | None |
| Primary   | Full time fa N/A         | Yes | 4    | 2 Over 15 Gc All     | None |
| Tertiary  | Full time farmer         | Yes | 1    | 0.5 11-15 Gorc Half  | Half |
| Primary   | Full time fa N/A         | Yes | 1    | 0.5 11-15 Gorc All   | None |
| Primary   | Full time fa N/A         | Yes | 6    | 4 Over 15 Gc All     | None |
| Secondary | Business m N/A           | Yes | 2    | 1 11-15 Gorc All     | None |
| Secondary | Employed N/A             | Yes | 1    | 1 11-15 Gorc All     | None |
| Tertiary  | Full time fa Self employ | Yes | 0    | 0 11-15 Gorc None    | All  |
| Secondary | Full time fa N/A         | Yes | 3    | 3 Over 15 Gc All     | None |
| Primary   | Full time fa N/A         | Yes | 0.5  | 0.25 Over 15 Gc Half | Half |
| Tertiary  | Employed N/A             | Yes | 1    | 1 6-10 Gorog All     | None |
| Primary   | Full time fa N/A         | Yes | 1    | 0.5 Over 15 Gc Half  | Half |
| Primary   | Full time fa N/A         | Yes | 1    | 0.75 6-10 Gorog All  | None |
| Secondary | Full time fa N/A         | Yes | 1    | 0.75 6-10 Gorog All  | None |
| Secondary | Business m N/A           | Yes | 1.5  | 1 6-10 Gorog All     | None |
| Secondary | Full time fa N/A         | Yes | 0.25 | 0.25 Over 15 Gc Half | Half |
| Primary   | Full time fa N/A         | Yes | 0.25 | 0.25 Over 15 Gc Half | Half |
| Primary   | Full time fa N/A         | Yes | 0.25 | 0.25 Over 15 Gc Half | Half |
| Primary   | Full time fa N/A         | Yes | 0.13 | 0.13 Over 15 Gc None | All  |
| None      | Full time fa N/A         | Yes | 0.5  | 0 Over 15 Gc None    | All  |
| Tertiary  | Full time fa N/A         | Yes | 1.5  | 1.5 Over 15 Gc Half  | Half |
| Tertiary  | Full time fa N/A         | Yes | 2    | 1.25 Over 15 Gc All  | None |
| Primary   | Full time fa N/A         | Yes | 2.5  | 1.75 Over 15 Gc All  | None |
| Tertiary  | Employed N/A             | Yes | 3    | 3 Over 15 Gc All     | All  |
| Tertiary  | Full time fa N/A         | Yes | 2    | 1.5 Over 15 Gc All   | None |
| Tertiary  | Employed N/A             | Yes | 2.5  | 2 Over 15 Gc All     | None |
| Secondary | Full time fa N/A         | Yes | 2    | 1.5 6-10 Gorog All   | None |
| Tertiary  | Full time fa N/A         | Yes | 3    | 2 Over 15 Gc All     | None |
| Tertiary  | Employed N/A             | Yes | 4    | 3.5 Over 15 Gc All   | All  |
| Tertiary  | Full time farmer         | Yes | 3    | 2.5 Over 15 Gc All   | All  |
| Primary   | Full time fa N/A         | Yes | 1.5  | 0.75 Over 15 Gc All  | None |
| Primary   | Full time fa N/A         | Yes | 1    | 0.5 6-10 Gorog All   | None |
| Tertiary  | Other                    | Yes | 1.5  | 0.75 Over 15 Gc All  | None |
| Secondary | Employed N/A             | Yes | 1    | 0.5 Over 15 Gc All   | None |
| Primary   | Full time fa N/A         | Yes | 0.75 | 0.5 Over 15 Gc All   | None |
| Primary   | Full time fa N/A         | Yes | 2    | 1 Over 15 Gc All     | None |
| Secondary | Employed N/A             | Yes | 1.5  | 1 Over 15 Gc All     | None |
| None      | Full time fa N/A         | Yes | 2    | 1 Over 15 Gc Half    | Half |
| None      | Full time fa N/A         | Yes | 6    | 5 Over 15 Gc None    | All  |
| None      | Full time fa N/A         | Yes | 2    | 2 Over 15 Gc None    | All  |
| Primary   | Full time fa N/A         | Yes | 2    | 1 Over 15 Gc None    | All  |
| Tertiary  | Full time fa N/A         | Yes | 1.5  | 1 Over 15 Gc Half    | Half |
| None      | Full time fa N/A         | Yes | 1    | 0.25 6-10 Gorog None | All  |
| Primary   | Full time fa N/A         | Yes | 1    | 0.25 6-10 Gorog None | All  |
| Primary   | Full time fa N/A         | Yes | 0.5  | 0.5 Over 15 Gc None  | All  |
| Secondary | Full time fa N/A         | Yes | 0.25 | 0.25 Over 15 Gc All  | None |



|           |                  |     |      |      |            |      |      |
|-----------|------------------|-----|------|------|------------|------|------|
| None      | Full time fa N/A | Yes | 0.75 | 0.75 | Over 15 Gc | None | All  |
| Primary   | Full time fa N/A | Yes | 4    | 4    | Over 15 Gc | All  | None |
| Primary   | Full time fa N/A | Yes | 1    | 0.5  | 1-5 Gorogc | All  | None |
| Secondary | Full time fa N/A | Yes | 1    | 0.5  | 6-10 Gorog | None | All  |
| Secondary | Full time fa N/A | Yes | 0.5  | 0.5  | 6-10 Gorog | All  | None |
| Tertiary  | Business m N/A   | Yes | 1    | 0.5  | Over 15 Gc | Half | Half |
| Primary   | Full time fa N/A | Yes | 0.5  | 0.5  | Over 15 Gc | None | All  |
| Primary   | Full time fa N/A | Yes | 1    | 0.5  | Over 15 Gc | None | All  |
| Primary   | Full time fa N/A | Yes | 8    | 3    | Over 15 Gc | None | All  |
| Primary   | Full time fa N/A | Yes | 6    | 5    | Over 15 Gc | None | All  |
| None      | Full time fa N/A | Yes | 5    | 2    | Over 15 Gc | None | All  |
| Tertiary  | Business m N/A   | Yes | 4    | 2    | Over 15 Gc | None | All  |
| Primary   | Full time fa N/A | Yes | 3    | 1    | Over 15 Gc | None | All  |
| Primary   | Full time fa N/A | Yes | 3    | 1    | Over 15 Gc | Half | Half |
| None      | Full time fa N/A | Yes | 4    | 2    | Over 15 Gc | All  | None |
| None      | Full time fa N/A | Yes | 11   | 5    | Over 15 Gc | All  | None |
| Secondary | Full time fa N/A | Yes | 4    | 2    | 11-15 Gorc | Half | Half |
| Secondary | Full time fa N/A | Yes | 1    | 1    | Over 15 Gc | Half | Half |
| None      | Full time fa N/A | Yes | 1    | 1    | Over 15 Gc | None | All  |
| Tertiary  | Employed N/A     | Yes | 15   | 10   | Over 15 Gc | Half | Half |
| None      | Full time fa N/A | Yes | 7    | 6    | Over 15 Gc | All  | None |
| Secondary | Full time fa N/A | Yes | 3    | 2    | Over 15 Gc | Half | Half |
| None      | Full time fa N/A | Yes | 4    | 3    | Over 15 Gc | None | All  |
| Primary   | Full time fa N/A | Yes | 0.5  | 0.25 | Over 15 Gc | Half | Half |
| Primary   | Other            | Yes | 1.5  | 1.5  | Over 15 Gc | None | All  |
| Secondary | Full time fa N/A | Yes | 4    | 4    | 11-15 Gorc | All  | None |
| Primary   | Full time fa N/A | Yes | 0.25 | 0.25 | 1-5 Gorogc | Half | Half |
| Secondary | Full time fa N/A | Yes | 2    | 1    | 1-5 Gorogc | None | All  |
| Primary   | Full time fa N/A | Yes | 2    | 0.5  | 1-5 Gorogc | None | All  |
| Secondary | Full time fa N/A | Yes | 3    | 2    | Over 15 Gc | All  | None |
| Primary   | Full time fa N/A | Yes | 1    | 0.25 | 6-10 Gorog | None | All  |
| Primary   | Full time fa N/A | Yes | 1    | 0.25 | 1-5 Gorogc | None | All  |
| Secondary | Full time fa N/A | Yes | 2.5  | 2    | 1-5 Gorogc | All  | None |
| Secondary | Full time fa N/A | Yes | 0.25 | 0.13 | 6-10 Gorog | Half | Half |
| Secondary | Full time fa N/A | Yes | 2    | 1.5  | Over 15 Gc | Half | Half |
| Primary   | Full time fa N/A | Yes | 0.25 | 0.13 | 11-15 Gorc | Half | Half |
| Secondary | Full time fa N/A | Yes | 0.25 | 0.13 | 11-15 Gorc | Half | Half |
| Primary   | Employed N/A     | Yes | 0.25 | 0.25 | 6-10 Gorog | None | All  |
| Primary   | Full time fa N/A | Yes | 0.25 | 0.25 | 6-10 Gorog | None | All  |
| Secondary | Full time fa N/A | Yes | 5    | 5    | Over 15 Gc | All  | None |
| Secondary | Full time fa N/A | Yes | 1    | 1    | Over 15 Gc | All  | None |
| Secondary | Full time fa N/A | Yes | 1.5  | 1.5  | 6-10 Gorog | All  | None |
| Secondary | Full time fa N/A | Yes | 3    | 3    | 6-10 Gorog | All  | None |
| Primary   | Full time fa N/A | Yes | 0.5  | 0.5  | 1-5 Gorogc | All  | None |
| Secondary | Full time fa N/A | Yes | 0.5  | 0.5  | Over 15 Gc | None | All  |
| None      | Full time fa N/A | Yes | 1    | 1    | Over 15 Gc | All  | None |
| Tertiary  | Full time fa N/A | Yes | 0.5  | 0.5  | Over 15 Gc | All  | None |

|           |                  |     |      |      |                 |      |
|-----------|------------------|-----|------|------|-----------------|------|
| Primary   | Full time fa N/A | Yes | 1    | 0.5  | Over 15 Gc Half | Half |
| Secondary | Full time fa N/A | Yes | 1    | 0.5  | 11-15 Gorc Half | Half |
| Secondary | Full time fa N/A | Yes | 1    | 0.5  | Over 15 Gc Half | Half |
| Primary   | Full time fa N/A | Yes | 2    | 1    | Over 15 Gc Half | Half |
| Primary   | Full time fa N/A | Yes | 0.5  | 0.25 | 11-15 Gorc Half | Half |
| Primary   | Full time fa N/A | Yes | 0.25 | 0.25 | Over 15 Gc Half | Half |
| Primary   | Full time fa N/A | Yes | 0.25 | 0.13 | 11-15 Gorc Half | Half |
| Secondary | Full time fa N/A | Yes | 4    | 2    | Over 15 Gc All  | None |
| Primary   | Full time fa N/A | Yes | 1    | 0.5  | Over 15 Gc None | All  |
| Tertiary  | Full time fa N/A | Yes | 7    | 3    | Over 15 Gc All  | None |
| Tertiary  | Employed N/A     | Yes | 1    | 0.5  | 11-15 Gorc All  | None |
| Secondary | Full time fa N/A | Yes | 3    | 0.25 | 6-10 Gorog All  | None |
| Primary   | Full time fa N/A | Yes | 4    | 2    | 11-15 Gorc None | All  |
| Primary   | Full time fa N/A | Yes | 1    | 1    | Over 15 Gc All  | None |
| Secondary | Full time fa N/A | Yes | 2    | 2    | 11-15 Gorc All  | None |
| Secondary | Full time fa N/A | Yes | 0.25 | 0.25 | Over 15 Gc All  | None |
| Secondary | Full time fa N/A | Yes | 1    | 0.75 | Over 15 Gc All  | None |
| None      | Full time fa N/A | Yes | 2    | 1    | Over 15 Gc None | All  |
| Primary   | Full time fa N/A | Yes | 3    | 2    | Over 15 Gc None | All  |
| Primary   | Full time fa N/A | Yes | 6    | 5    | Over 15 Gc None | All  |
| Primary   | Full time fa N/A | Yes | 6    | 5    | Over 15 Gc None | All  |
| Primary   | Full time fa N/A | Yes | 6    | 5    | Over 15 Gc None | All  |
| Primary   | Full time fa N/A | Yes | 1    | 0.5  | Over 15 Gc None | All  |
| Primary   | Full time fa N/A | Yes | 6    | 5    | Over 15 Gc None | All  |
| Primary   | Employed N/A     | Yes | 5    | 0.5  | Over 15 Gc None | All  |
| None      | Full time fa N/A | Yes | 3    | 5    | Over 15 Gc None | All  |
| Primary   | Full time fa N/A | Yes | 6    | 5    | Over 15 Gc None | All  |
| Primary   | Full time fa N/A | Yes | 5    | 2    | 11-15 Gorc None | All  |
| Secondary | Business m N/A   | Yes | 12   | 7    | Over 15 Gc Half | Half |
| Primary   | Full time fa N/A | Yes | 8    | 3    | Over 15 Gc None | All  |
| Primary   | Full time fa N/A | Yes | 5    | 4    | Over 15 Gc None | All  |
| Secondary | Employed N/A     | Yes | 3    | 1    | 6-10 Gorog None | All  |
| None      | Full time fa N/A | Yes | 4    | 2    | Over 15 Gc None | All  |
| Secondary | Full time fa N/A | Yes | 2    | 1    | Over 15 Gc Half | Half |
| Secondary | Full time fa N/A | Yes | 2    | 1    | Over 15 Gc Half | Half |
| Primary   | Full time fa N/A | Yes | 3    | 2.5  | Over 15 Gc None | All  |
| Primary   | Other Artisan    | Yes | 1    | 0.5  | Over 15 Gc Half | Half |
| Tertiary  | Employed N/A     | Yes | 5    | 5    | Over 15 Gc Half | Half |
| Secondary | Employed N/A     | Yes | 7    | 3    | Over 15 Gc Half | Half |
| Secondary | Full time fa N/A | Yes | 10   | 8    | Over 15 Gc Half | Half |
| None      | Full time fa N/A | Yes | 4    | 2    | Over 15 Gc None | All  |
| Primary   | Full time fa N/A | Yes | 1.5  | 0.5  | Over 15 Gc All  | None |
| Tertiary  | Employed N/A     | Yes | 1.5  | 1.5  | 6-10 Gorog All  | None |
| Secondary | Business m N/A   | Yes | 1.5  | 1.5  | 1-5 Gorogc All  | All  |
| Primary   | Full time fa N/A | Yes | 10   | 10   | Over 15 Gc All  | None |
| Secondary | Business m N/A   | Yes | 2    | 2    | 1-5 Gorogc None | All  |
| Tertiary  | Business m N/A   | Yes | 2    | 1    | Over 15 Gc All  | None |

|           |              |             |     |      |      |            |      |      |
|-----------|--------------|-------------|-----|------|------|------------|------|------|
| Primary   | Full time fa | N/A         | Yes | 1.5  | 1.5  | 11-15 Gorc | None | All  |
| Primary   | Full time fa | N/A         | Yes | 3    | 3    | Over 15 Gc | Half | Half |
| None      | Full time fa | N/A         | Yes | 2    | 2    | 11-15 Gorc | Half | Half |
| Tertiary  | Employed     | N/A         | Yes | 2.5  | 2.5  | 1-5 Gorogc | All  | None |
| Primary   | Full time fa | N/A         | Yes | 1.5  | 0    | Over 15 Gc | None | All  |
| Primary   | Employed     | N/A         | Yes | 2.5  | 2.5  | 11-15 Gorc | None | All  |
| None      | Full time fa | N/A         | Yes | 2    | 2    | 11-15 Gorc | Half | Half |
| Primary   | Other        | Dry cleaner | Yes | 1    | 1    | 6-10 Gorog | All  | None |
| Secondary | Other        | Casual labc | Yes | 0.5  | 0.5  | 1-5 Gorogc | All  | None |
| Secondary | Other        | Casual labc | Yes | 0.5  | 0.5  | Over 15 Gc | Half | Half |
| Tertiary  | Employed     | N/A         | Yes | 4    | 4    | 6-10 Gorog | All  | None |
| Tertiary  | Employed     | N/A         | Yes | 2    | 2    | 1-5 Gorogc | All  | None |
| Tertiary  | Employed     | N/A         | Yes | 1.5  | 1.5  | 6-10 Gorog | All  | None |
| Primary   | Business m   | N/A         | Yes | 1    | 1    | Over 15 Gc | All  | None |
| Tertiary  | Employed     | N/A         | Yes | 2    | 2    | 6-10 Gorog | None | All  |
| Secondary | Full time fa | N/A         | Yes | 2    | 1    | 1-5 Gorogc | Half | Half |
| Primary   | Full time fa | N/A         | Yes | 2    | 1    | 11-15 Gorc | Half | Half |
| Secondary | Full time fa | N/A         | Yes | 2    | 0.5  | 11-15 Gorc | All  | None |
| Secondary | Full time fa | N/A         | Yes | 2    | 1    | 6-10 Gorog | All  | None |
| Primary   | Full time fa | N/A         | Yes | 2    | 0.25 | 6-10 Gorog | All  | None |
| Primary   | Full time fa | N/A         | Yes | 4    | 3    | Over 15 Gc | All  | None |
| Secondary | Full time fa | N/A         | Yes | 3    | 2    | Over 15 Gc | All  | None |
| Primary   | Other        | Dependant   | Yes | 1    | 0.5  | 1-5 Gorogc | Half | Half |
| Secondary | Full time fa | N/A         | Yes | 12   | 0.5  | Over 15 Gc | All  | None |
| Primary   | Full time fa | N/A         | Yes | 3    | 2    | 6-10 Gorog | All  | None |
| Secondary | Full time fa | N/A         | Yes | 3    | 3    | 6-10 Gorog | Half | None |
| Primary   | Full time fa | N/A         | Yes | 1    | 1    | 6-10 Gorog | All  | None |
| None      | Full time fa | N/A         | Yes | 2    | 2    | 6-10 Gorog | Half | None |
| Secondary | Business m   | N/A         | Yes | 3    | 1    | Over 15 Gc | All  | None |
| Secondary | Business m   | N/A         | Yes | 8    | 8    | Over 15 Gc | All  | None |
| Primary   | Full time fa | N/A         | Yes | 4    | 4    | Over 15 Gc | All  | None |
| Secondary | Full time fa | N/A         | Yes | 7    | 5    | Over 15 Gc | All  | None |
| Secondary | Full time fa | N/A         | Yes | 5    | 5    | Over 15 Gc | All  | None |
| Tertiary  | Full time fa | N/A         | Yes | 3.5  | 3.5  | Over 15 Gc | All  | None |
| Secondary | Full time fa | N/A         | Yes | 1    | 1    | 6-10 Gorog | All  | None |
| Primary   | Full time fa | N/A         | Yes | 1    | 1    | Over 15 Gc | All  | None |
| Secondary | Full time fa | N/A         | Yes | 2    | 2    | 6-10 Gorog | All  | None |
| Primary   | Full time fa | N/A         | Yes | 3    | 2.5  | 11-15 Gorc | All  | None |
| Primary   | Full time fa | N/A         | Yes | 5    | 3    | Over 15 Gc | All  | None |
| Tertiary  | Full time fa | N/A         | Yes | 30   | 15   | Over 15 Gc | All  | None |
| None      | Full time fa | N/A         | Yes | 8    | 4    | Over 15 Gc | Half | Half |
| Primary   | Full time fa | N/A         | Yes | 2    | 1    | 11-15 Gorc | All  | None |
| Secondary | Full time fa | N/A         | Yes | 2    | 2    | 11-15 Gorc | All  | None |
| None      | Employed     | N/A         | Yes | 1.5  | 7    | Over 15 Gc | All  | None |
| Primary   | Full time fa | N/A         | Yes | 1.25 | 0.75 | Over 15 Gc | All  | None |
| None      | Business m   | N/A         | Yes | 4    | 1    | Over 15 Gc | All  | None |
| Primary   | Full time fa | N/A         | Yes | 2    | 1.5  | Over 15 Gc | All  | None |

|           |                  |     |      |                      |      |
|-----------|------------------|-----|------|----------------------|------|
| Primary   | Full time fa N/A | Yes | 8    | 5 6-10 Gorog All     | None |
| Secondary | Employed N/A     | Yes | 8    | 5 11-15 Gorc All     | None |
| Secondary | Full time fa N/A | Yes | 6.5  | 5 Over 15 Gc All     | None |
| Tertiary  | Employed N/A     | Yes | 4    | 4 Over 15 Gc All     | None |
| Secondary | Full time farmer | Yes | 2    | 1.5 6-10 Gorog All   | None |
| Tertiary  | Full time fa N/A | Yes | 4    | 3.25 6-10 Gorog All  | None |
| Secondary | Full time fa N/A | Yes | 2    | 1.5 Over 15 Gc All   | None |
| Secondary | Full time fa N/A | Yes | 1.5  | 1.5 Over 15 Gc All   | None |
| Primary   | Full time fa N/A | Yes | 4.5  | 3.5 Over 15 Gc All   | None |
| Secondary | Employed N/A     | Yes | 2    | 2 Over 15 Gc All     | None |
| Primary   | Full time fa N/A | Yes | 0.75 | 0.75 11-15 Gorc Half | Half |
| None      | Full time fa N/A | Yes | 6    | 4 Over 15 Gc All     | None |
| Tertiary  | Full time fa N/A | Yes | 2.75 | 2 11-15 Gorc All     | None |
| Primary   | Full time fa N/A | Yes | 1    | 1 Over 15 Gc All     | None |
| Primary   | Full time fa N/A | Yes | 1    | 1 Over 15 Gc Half    | Half |
| Tertiary  | Employed N/A     | Yes | 1.75 | 0.5 Over 15 Gc All   | None |
| Tertiary  | Employed N/A     | Yes | 2    | 0.5 Over 15 Gc Half  | Half |
| None      | Full time fa N/A | Yes | 1.5  | 0.5 Over 15 Gc All   | None |
| Primary   | Full time fa N/A | Yes | 1    | 0.25 6-10 Gorog All  | None |
| Secondary | Full time fa N/A | Yes | 2    | 2 6-10 Gorog Half    | Half |
| Primary   | Full time fa N/A | Yes | 10   | 8 6-10 Gorog All     | None |
| Tertiary  | Employed N/A     | Yes | 3    | 2 Over 15 Gc All     | None |
| Secondary | Business m N/A   | Yes | 1    | 1 6-10 Gorog All     | None |
| Primary   | Full time fa N/A | Yes | 1.5  | 1 11-15 Gorc All     | None |
| Primary   | Full time fa N/A | Yes | 3    | 3 Over 15 Gc All     | None |
| Primary   | Full time fa N/A | Yes | 6    | 5 Over 15 Gc None    | All  |
| Secondary | Full time fa N/A | Yes | 3    | 2.5 Over 15 Gc All   | None |
| Secondary | Full time fa N/A | Yes | 1    | 0.5 11-15 Gorc Half  | Half |
| None      | Full time fa N/A | Yes | 2    | 2 Over 15 Gc Half    | Half |
| Primary   | Business m N/A   | Yes | 5    | 4 Over 15 Gc All     | None |
| Tertiary  | Employed N/A     | Yes | 4    | 4 11-15 Gorc All     | None |
| Primary   | Full time fa N/A | Yes | 1    | 0.5 Over 15 Gc Half  | Half |
| Primary   | Full time fa N/A | Yes | 2    | 0.5 6-10 Gorog Half  | Half |
| Primary   | Full time fa N/A | Yes | 3    | 2 1-5 Gorogc Half    | Half |
| Secondary | Full time fa N/A | Yes | 2.5  | 2 11-15 Gorc All     | None |
| Secondary | Full time fa N/A | Yes | 5    | 2.5 11-15 Gorc All   | None |
| Secondary | Full time fa N/A | Yes | 5    | 1 Over 15 Gc None    | All  |
| None      | Employed N/A     | Yes | 0.5  | 0.5 11-15 Gorc All   | None |
| Secondary | Full time fa N/A | Yes | 3    | 2 Over 15 Gc All     | None |
| Secondary | Full time fa N/A | Yes | 1    | 1 6-10 Gorog All     | None |
| Primary   | Full time fa N/A | Yes | 3    | 1 11-15 Gorc All     | None |
| Secondary | Full time fa N/A | Yes | 2    | 2 Over 15 Gc All     | None |
| Secondary | Full time fa N/A | Yes | 2    | 2 Over 15 Gc All     | None |
| Secondary | Full time fa N/A | Yes | 3    | 1.73 11-15 Gorc All  | None |
| Primary   | Full time fa N/A | Yes | 1.25 | 1 11-15 Gorc All     | None |
| Primary   | Full time fa N/A | Yes | 5    | 4 11-15 Gorc All     | None |
| Primary   | Full time fa N/A | Yes | 3    | 0.5 Over 15 Gc All   | None |

|           |              |     |     |     |     |                 |      |
|-----------|--------------|-----|-----|-----|-----|-----------------|------|
| Tertiary  | Employed     | N/A | Yes | 2   | 1.5 | 11-15 Gorc All  | None |
| None      | Full time fa | N/A | Yes | 1   | 1   | Over 15 Gc None | All  |
| Tertiary  | Full time fa | N/A | Yes | 10  | 4   | 6-10 Gorog All  | None |
| Secondary | Full time fa | N/A | Yes | 12  | 1   | Over 15 Gc All  | All  |
| Primary   | Full time fa | N/A | Yes | 3.5 | 3.5 | Over 15 Gc All  | None |
| Tertiary  | Business m   | N/A | Yes | 2   | 1   | 11-15 Gorc All  | None |
| Secondary | Full time fa | N/A | Yes | 1   | 1   | Over 15 Gc Half | Half |
| Secondary | Full time fa | N/A | Yes | 12  | 7   | 6-10 Gorog All  | None |
| None      | Business m   | N/A | Yes | 3   | 3   | 11-15 Gorc All  | None |
| Tertiary  | Full time fa | N/A | Yes | 2   | 1.5 | 6-10 Gorog Half | Half |
| Secondary | Full time fa | N/A | Yes | 2   | 1.5 | 6-10 Gorog Half | Half |
| Primary   | Full time fa | N/A | Yes | 1.5 | 1   | Over 15 Gc All  | None |
| Secondary | Full time fa | N/A | Yes | 1   | 0.5 | Over 15 Gc Half | Half |
| Primary   | Full time fa | N/A | Yes | 0.5 | 0.5 | Over 15 Gc Half | Half |
| Tertiary  | Full time fa | N/A | Yes | 1   | 1   | 1-5 Gorogc None | All  |
| Primary   | Full time fa | N/A | Yes | 4   | 3.5 | Over 15 Gc All  | None |
| Secondary | Full time fa | N/A | Yes | 2   | 1.5 | Over 15 Gc Half | Half |
| None      | Employed     | N/A | Yes | 4   | 4   | Over 15 Gc All  | None |
| Secondary | Employed     | N/A | Yes | 1   | 1   | 1-5 Gorogc Half | Half |
| Primary   | Full time fa | N/A | Yes | 1   | 1   | 6-10 Gorog Half | Half |
| Primary   | Full time fa | N/A | Yes | 2.5 | 2   | 11-15 Gorc Half | Half |
| Primary   | Full time fa | N/A | Yes | 1   | 0.5 | Over 15 Gc None | All  |
| Primary   | Full time fa | N/A | Yes | 2.5 | 2   | Over 15 Gc All  | None |
| Secondary | Full time fa | N/A | Yes | 2   | 1.5 | 6-10 Gorog All  | None |
| Primary   | Full time fa | N/A | Yes | 2   | 2   | Over 15 Gc All  | None |
| Tertiary  | Full time fa | N/A | Yes | 5   | 5   | Over 15 Gc All  | None |
| Secondary | Business m   | N/A | Yes | 4   | 4   | 11-15 Gorc All  | None |
| Primary   | Full time fa | N/A | Yes | 5   | 4   | Over 15 Gc All  | None |
| Secondary | Full time fa | N/A | Yes | 3   | 2   | 11-15 Gorc All  | None |
| Tertiary  | Employed     | N/A | Yes | 0.5 | 0.5 | Over 15 Gc All  | None |
| Secondary | Business m   | N/A | Yes | 1   | 1   | Over 15 Gc Half | Half |
| Primary   | Full time fa | N/A | Yes | 2.5 | 2   | Over 15 Gc All  | None |
| Secondary | Full time fa | N/A | Yes | 8   | 7   | Over 15 Gc All  | None |

| human_mc | animal_mo | milk_cowfe | mix_dry_w | goog_wet_ | sell_mold_ | home_con: | quality_gra | discoloure | ec |
|----------|-----------|------------|-----------|-----------|------------|-----------|-------------|------------|----|
| No       | Yes       | Yes        | No        | No        | No         | 30        | Good        |            | 2  |
| No       | No        | No         | No        | No        | No         | 40        | Good        |            | 0  |
| No       | No        | Yes        | No        | No        | No         | 0         |             |            |    |
| No       | Yes       | Yes        | No        | No        | Yes        | 30        | Good        |            | 0  |
| No       | Yes       | Yes        | No        | No        | Yes        | 30        | Good        |            | 0  |
| No       | Yes       | Yes        | No        | No        | Yes        | 30        | Good        |            | 0  |
| No       | No        | No         | No        | No        | Yes        | 30        | Good        |            | 0  |
| No       | Yes       | Yes        | No        | No        | Yes        | 30        | Good        |            | 0  |
| No       | No        | No         | No        | No        | No         | 30        | Good        |            | 0  |
| No       | Yes       | Yes        | No        | No        | Yes        | 30        | Good        |            | 0  |
| No       | Yes       | Yes        | No        | No        | Yes        | 30        | Good        |            | 0  |
| No       | Yes       | Yes        | No        | No        | Yes        | 30        | Good        |            | 0  |
| No       | Yes       | Yes        | No        | No        | Yes        | 30        | Good        |            | 0  |
| No       | Yes       | Yes        | No        | No        | No         | 30        | Good        |            | 0  |
| No       | No        | No         | No        | No        | Yes        | 30        | Good        |            | 0  |
| No       | Yes       | Yes        | No        | No        | Yes        | 30        | Good        |            | 0  |
| No       | Yes       | Yes        | No        | No        | Yes        | 30        | Good        |            | 0  |
| No       | Yes       | Yes        | No        | No        | Yes        | 30        | Good        |            | 0  |
| No       | Yes       | Yes        | No        | No        | Yes        | 30        | Good        |            | 0  |
| No       | No        | No         | No        | No        | No         | 450       | Good        |            | 0  |
| No       | Yes       | Yes        | No        | No        | Yes        | 30        | Good        |            | 0  |
| No       | Yes       | Yes        | No        | No        | Yes        | 30        | Good        |            | 0  |
| No       | No        | No         | No        | No        | No         | 30        | Good        |            | 0  |
| No       | No        | No         | No        | No        | No         | 540       | Good        |            | 0  |
| No       | Yes       | Yes        | No        | No        | Yes        | 30        | Good        |            | 0  |
| No       | No        | Yes        | No        | No        | No         | 90        | Good        |            | 90 |
| No       | No        | No         | No        | No        | No         | 56        | Good        |            | 0  |
| No       | No        | No         | No        | No        | No         | 0         |             |            |    |
| No       | No        | Yes        | No        | No        | No         | 20        | Good        |            | 0  |
| No       | No        | No         | No        | No        | No         | 24        | Good        |            | 0  |
| No       | No        | No         | No        | No        | No         | 0         |             |            |    |
| No       | No        | No         | No        | No        | No         | 0         |             |            |    |
| No       | Yes       | Yes        | No        | No        | No         | 0         |             |            |    |
| No       | Yes       | Yes        | No        | No        | Yes        | 0         |             |            |    |
| No       | Yes       | Yes        | No        | No        | No         | 30        | Good        |            | 4  |
| No       | Yes       | Yes        | No        | No        | No         | 40        | Good        |            | 0  |
| No       | No        | No         | No        | No        | Yes        | 30        | Good        |            | 0  |
| No       | No        | No         | No        | No        | No         | 30        | Good        |            | 0  |
| No       | Yes       | Yes        | No        | No        | Yes        | 30        | Good        |            | 0  |
| No       | Yes       | Yes        | No        | No        | Yes        | 30        | Good        |            | 0  |
| No       | No        | No         | No        | No        | No         | 30        | Good        |            | 0  |
| No       | No        | No         | No        | No        | No         | 30        | Good        |            | 0  |
| No       | No        | No         | No        | No        | No         | 30        | Good        |            | 0  |
| No       | Yes       | Yes        | No        | No        | Yes        | 30        | Good        |            | 0  |
| No       | Yes       | Yes        | No        | No        | Yes        | 30        | Good        |            | 0  |
| No       | No        | No         | No        | No        | No         | 30        | Good        |            | 0  |
| No       | No        | No         | No        | No        | No         | 30        | Good        |            | 0  |
| No       | Yes       | Yes        | No        | No        | Yes        | 30        | Good        |            | 0  |
| No       | No        | No         | No        | No        | No         | 30        | Good        |            | 0  |

|     |     |     |     |     |     |          |    |
|-----|-----|-----|-----|-----|-----|----------|----|
| No  | Yes | Yes | No  | No  | Yes | 30 Good  | 0  |
| No  | No  | Yes | No  | No  | No  | 30 Good  | 0  |
| No  | Yes | Yes | No  | No  | Yes | 30 Good  | 0  |
| No  | No  | Yes | No  | No  | No  | 10 Good  | 0  |
| No  | No  | No  | No  | No  | No  | 30 Good  | 0  |
| No  | Yes | Yes | No  | No  | Yes | 30 Good  | 0  |
| No  | No  | No  | No  | No  | Yes | 30 Good  | 0  |
| No  | No  | No  | No  | No  | No  | 360 Good | 0  |
| No  | No  | No  | No  | No  | Yes | 0        |    |
| No  | No  | No  | No  | No  | No  | 30 Good  | 0  |
| Yes | Yes | Yes | Yes | Yes | Yes | 40 Good  | 0  |
| No  | No  | No  | No  | No  | No  | 16 Good  | 0  |
| No  | No  | No  | No  | No  | No  | 56 Good  | 0  |
| No  | No  | No  | No  | No  | No  | 20 Good  | 0  |
| No  | Yes | No  | No  | No  | No  | 20 Good  | 0  |
| No  | Yes | No  | No  | No  | No  | 16 Good  | 0  |
| No  | No  | No  | No  | No  | No  | 0        |    |
| No  | No  | No  | No  | No  | No  | 0        |    |
| No  | No  | No  | No  | No  | No  | 0        |    |
| No  | No  | No  | No  | No  | No  | 0        |    |
| No  | Yes | Yes | No  | No  | No  | 0        |    |
| No  | No  | No  | No  | No  | No  | 90 Good  | 45 |
| No  | No  | No  | No  | No  | No  | 90 Good  | 0  |
| No  | Yes | Yes | No  | No  | Yes | 90 Good  | 0  |
| No  | Yes | Yes | No  | No  | No  | 30 Good  | 4  |
| No  | Yes | Yes | No  | No  | Yes | 30 Good  | 2  |
| No  | Yes | Yes | No  | No  | Yes | 30 Good  | 6  |
| No  | Yes | Yes | No  | No  | Yes | 20 Good  | 45 |
| No  | Yes | Yes | No  | No  | Yes | 30 Good  | 2  |
| No  | Yes | Yes | No  | No  | No  | 30 Good  | 4  |
| No  | Yes | Yes | No  | Yes | No  | 30 Good  | 4  |
| No  | No  | No  | No  | No  | Yes | 60 Good  | 15 |
| No  | Yes | Yes | No  | No  | Yes | 15 Good  | 0  |
| No  | Yes | Yes | No  | No  | No  | 50 Bad   | 0  |
| No  | No  | Yes | No  | No  | No  | 40 Good  | 0  |
| No  | No  | No  | No  | No  | No  | 40 Good  | 0  |
| No  | No  | Yes | No  | No  | No  | 40 Good  | 0  |
| No  | No  | No  | No  | No  | No  | 90 Good  | 0  |
| No  | No  | No  | No  | No  | No  | 0        |    |
| No  | No  | No  | No  | No  | No  | 0        |    |
| No  | No  | No  | No  | No  | No  | 0        |    |
| No  | No  | No  | No  | No  | No  | 0        |    |
| No  | No  | No  | No  | No  | No  | 5 Good   | 0  |
| No  | Yes | Yes | No  | No  | No  | 0        |    |
| No  | Yes | Yes | No  | No  | No  | 0        |    |
| No  | No  | No  | No  | No  | No  | 0        |    |
| No  | No  | No  | No  | No  | No  | 90 Good  | 0  |

|     |     |     |     |     |     |           |    |
|-----|-----|-----|-----|-----|-----|-----------|----|
| No  | No  | No  | No  | No  | No  | 0         |    |
| No  | No  | No  | No  | No  | No  | 0         |    |
| No  | No  | No  | No  | No  | No  | 10 Good   | 2  |
| No  | No  | No  | No  | No  | No  | 15 Good   | 1  |
| No  | No  | No  | No  | No  | No  | 90 Good   | 0  |
| Yes | Yes | Yes | Yes | No  | No  | 60 Good   | 5  |
| No  | No  | No  | No  | No  | No  | 10 Bad    | 5  |
| No  | No  | No  | No  | No  | No  | 0         |    |
| No  | No  | No  | No  | No  | No  | 0         |    |
| No  | No  | No  | No  | No  | No  | 0         |    |
| No  | No  | No  | No  | No  | No  | 0         |    |
| No  | No  | No  | No  | No  | No  | 0         |    |
| No  | No  | No  | No  | No  | No  | 0         |    |
| Yes | Yes | Yes | Yes | Yes | Yes | 0         |    |
| No  | No  | No  | No  | No  | No  | 0         |    |
| No  | No  | No  | No  | No  | No  | 1080 Good | 0  |
| No  | No  | No  | No  | No  | No  | 90 Good   | 10 |
| No  | No  | No  | No  | No  | No  | 45 Good   | 0  |
| No  | No  | No  | No  | No  | No  | 0         |    |
| No  | No  | No  | No  | No  | No  | 45 Good   | 0  |
| No  | No  | No  | No  | No  | No  | 50 Good   | 0  |
| No  | No  | No  | No  | No  | No  | 30 Good   | 0  |
| No  | No  | No  | No  | No  | No  | 0         |    |
| No  | No  | Yes | Yes | No  | No  | 90 Good   | 0  |
| No  | No  | No  | No  | No  | No  | 55 Good   | 0  |
| No  | No  | No  | No  | No  | No  | 20 Good   | 0  |
| No  | No  | No  | No  | No  | No  | 0         |    |
| Yes | Yes | Yes | No  | No  | No  | 0         |    |
| Yes | Yes | Yes | Yes | Yes | Yes | 0         |    |
| No  | No  | Yes | No  | No  | No  | 100 Good  | 0  |
| No  | No  | No  | No  | No  | No  | 0         |    |
| No  | No  | No  | No  | No  | No  | 10 Good   | 0  |
| No  | No  | No  | No  | No  | No  | 4 Good    | 2  |
| No  | No  | No  | No  | No  | No  | 180 Good  | 0  |
| No  | No  | No  | No  | No  | No  | 180 Good  | 0  |
| No  | No  | No  | No  | No  | No  | 23 Good   | 0  |
| No  | No  | No  | No  | No  | No  | 17 Good   | 0  |
| No  | No  | No  | No  | No  | No  | 0         |    |
| No  | No  | No  | No  | No  | No  | 0         |    |
| No  | No  | No  | No  | No  | No  | 40 Good   | 0  |
| No  | No  | No  | No  | No  | No  | 60 Good   | 4  |
| No  | No  | No  | No  | No  | No  | 20 Good   | 2  |
| No  | No  | No  | No  | No  | No  | 20 Good   | 0  |
| No  | No  | No  | No  | No  | No  | 90 Good   | 2  |
| No  | No  | No  | No  | No  | No  | 0         |    |
| No  | No  | No  | No  | No  | No  | 90 Good   | 10 |
| No  | No  | No  | No  | No  | No  | 270 Good  | 0  |





|    |     |     |     |    |     |           |    |
|----|-----|-----|-----|----|-----|-----------|----|
| No | No  | No  | No  | No | No  | 30 Good   | 0  |
| No | No  | No  | No  | No | No  | 40 Good   | 0  |
| No | No  | No  | No  | No | No  | 21 Good   | 0  |
| No | No  | No  | No  | No | No  | 10 Good   | 2  |
| No | No  | No  | No  | No | No  | 0         |    |
| No | No  | No  | No  | No | No  | 24 Good   | 0  |
| No | No  | No  | No  | No | No  | 24 Good   | 0  |
| No | No  | No  | No  | No | No  | 12 Good   | 0  |
| No | No  | No  | No  | No | No  | 2 Good    | 0  |
| No | No  | No  | No  | No | No  | 0         |    |
| No | No  | Yes | No  | No | No  | 20 Good   | 0  |
| No | No  | No  | No  | No | No  | 10 Good   | 0  |
| No | No  | Yes | Yes | No | No  | 20 Good   | 0  |
| No | No  | No  | No  | No | No  | 90 Good   | 0  |
| No | No  | No  | No  | No | No  | 0         |    |
| No | No  | Yes | No  | No | No  | 50 Good   | 0  |
| No | No  | Yes | No  | No | No  | 20 Good   | 0  |
| No | Yes | Yes | No  | No | No  | 25 Good   | 0  |
| No | No  | Yes | No  | No | No  | 20 Good   | 0  |
| No | No  | No  | No  | No | No  | 18 Good   | 0  |
| No | No  | No  | No  | No | No  | 40 Good   | 0  |
| No | No  | Yes | No  | No | No  | 90 Good   | 0  |
| No | No  | No  | No  | No | No  | 12 Good   | 1  |
| No | No  | No  | No  | No | No  | 60 Good   | 0  |
| No | No  | Yes | No  | No | No  | 40 Good   | 0  |
| No | No  | No  | No  | No | No  | 10 Good   | 0  |
| No | No  | No  | No  | No | No  | 20 Good   | 0  |
| No | No  | No  | No  | No | No  | 30 Good   | 0  |
| No | No  | No  | No  | No | No  | 12 Good   | 2  |
| No | No  | No  | No  | No | No  | 45 Good   | 4  |
| No | No  | No  | No  | No | No  | 90 Good   | 23 |
| No | No  | No  | No  | No | No  | 30 Good   | 0  |
| No | No  | No  | No  | No | No  | 35 Good   |    |
| No | No  | No  | No  | No | No  | 30 Good   | 0  |
| No | Yes | No  | No  | No | No  | 16 Good   | 0  |
| No | Yes | No  | No  | No | No  | 40 Good   | 0  |
| No | No  | No  | No  | No | No  | 16 Good   | 0  |
| No | No  | No  | No  | No | No  | 28 Good   | 0  |
| No | No  | No  | No  | No | No  | 40 Good   | 0  |
| No | No  | No  | No  | No | No  | 40 Good   | 0  |
| No | Yes | Yes | No  | No | Yes | 30 Good   | 0  |
| No | No  | No  | No  | No | No  | 1350 Good | 10 |
| No | No  | No  | No  | No | No  | 24 Bad    | 23 |
| No | Yes | Yes | No  | No | No  | 40 Good   | 0  |
| No | Yes | Yes | No  | No | Yes | 30 Good   | 0  |
| No | No  | No  | No  | No | No  | 35 Good   | 0  |
| No | No  | No  | No  | No | No  | 80 Good   | 0  |

|     |     |     |    |     |     |          |    |
|-----|-----|-----|----|-----|-----|----------|----|
| No  | No  | No  | No | No  | No  | 30 Good  | 0  |
| No  | No  | No  | No | No  | No  | 30 Good  | 0  |
| No  | No  | No  | No | No  | No  | 90 Good  | 23 |
| No  | No  | No  | No | No  | No  | 64 Good  | 0  |
| No  | Yes | No  | No | No  | No  | 20 Good  | 0  |
| No  | No  | No  | No | No  | No  | 20 Good  | 0  |
| No  | No  | Yes | No | No  | No  | 90 Good  | 2  |
| No  | No  | No  | No | No  | No  | 56 Good  | 8  |
| No  | No  | No  | No | No  | No  | 90 Good  | 68 |
| No  | No  | No  | No | No  | No  | 44 Good  | 0  |
| No  | No  | No  | No | No  | No  | 900 Good | 0  |
| No  | Yes | Yes | No | No  | Yes | 30 Good  | 0  |
| No  | No  | No  | No | No  | No  | 30 Good  | 0  |
| No  | Yes | No  | No | No  | No  | 40 Good  | 0  |
| No  | No  | No  | No | No  | No  | 0        |    |
| No  | No  | No  | No | No  | No  | 90 Good  | 0  |
| No  | Yes | Yes | No | No  | No  | 40 Good  | 4  |
| No  | No  | No  | No | No  | No  | 90 Good  | 0  |
| No  | No  | No  | No | No  | No  | 10 Good  | 0  |
| No  | No  | No  | No | No  | No  | 90 Good  | 0  |
| No  | No  | No  | No | No  | No  | 30 Good  | 0  |
| No  | No  | No  | No | No  | No  | 30 Good  | 0  |
| No  | No  | No  | No | No  | No  | 30 Good  | 0  |
| No  | No  | No  | No | No  | No  | 24 Good  | 0  |
| No  | No  | No  | No | No  | No  | 80 Good  | 0  |
| Yes | Yes | Yes | No | Yes | Yes | 0        |    |
| No  | No  | Yes | No | No  | No  | 50 Good  | 0  |
| No  | No  | No  | No | No  | No  | 7 Good   | 1  |
| No  | No  | No  | No | No  | No  | 120 Good | 0  |
| No  | Yes | Yes | No | No  | No  | 30 Good  | 0  |
| No  | No  | No  | No | No  | No  | 30 Good  | 0  |
| No  | No  | No  | No | No  | No  | 45 Good  | 0  |
| No  | No  | No  | No | No  | No  | 45 Good  | 0  |
| No  | No  | No  | No | No  | No  | 90 Good  | 20 |
| No  | No  | No  | No | No  | No  | 30 Good  | 23 |
| No  | No  | No  | No | No  | No  | 24 Good  | 0  |
| No  | No  | No  | No | No  | No  | 36 Good  | 0  |
| No  | No  | No  | No | No  | No  | 30 Good  | 0  |
| No  | No  | No  | No | No  | No  | 45 Good  | 0  |
| No  | No  | No  | No | No  | No  | 90 Good  | 45 |
| No  | No  | No  | No | No  | No  | 30 Good  | 0  |
| No  | No  | No  | No | No  | No  | 90 Good  | 0  |
| No  | No  | No  | No | No  | No  | 30 Good  | 0  |
| No  | No  | No  | No | No  | No  | 30 Good  | 0  |
| No  | No  | No  | No | No  | No  | 24 Good  | 0  |
| No  | No  | No  | No | No  | No  | 20 Good  | 0  |
| No  | Yes | No  | No | No  | No  | 40 Good  | 0  |

|     |     |     |    |    |     |         |    |
|-----|-----|-----|----|----|-----|---------|----|
| No  | No  | No  | No | No | No  | 24 Good | 0  |
| No  | No  | No  | No | No | No  | 0       |    |
| No  | Yes | Yes | No | No | No  | 20 Good | 2  |
| No  | No  | No  | No | No | No  | 45 Good | 0  |
| No  | No  | No  | No | No | No  | 30 Good | 45 |
| No  | Yes | No  | No | No | No  | 30 Good | 0  |
| No  | No  | No  | No | No | No  | 0       |    |
| No  | No  | No  | No | No | No  | 30 Good | 0  |
| No  | No  | No  | No | No | No  | 30 Good | 0  |
| No  | Yes | Yes | No | No | Yes | 8 Good  | 45 |
| No  | Yes | Yes | No | No | Yes | 8 Good  | 45 |
| No  | No  | No  | No | No | No  | 40 Good | 0  |
| No  | No  | No  | No | No | No  | 12 Good | 0  |
| No  | No  | No  | No | No | No  | 72 Good | 0  |
| No  | No  | No  | No | No | No  | 30 Good | 0  |
| Yes | No  | No  | No | No | Yes | 60 Good | 0  |
| No  | No  | No  | No | No | No  | 54 Good | 0  |
| No  | No  | No  | No | No | No  | 30 Good | 0  |
| No  | No  | Yes | No | No | No  | 10 Good | 0  |
| No  | Yes | Yes | No | No | No  | 20 Good | 0  |
| No  | Yes | Yes | No | No | No  | 100 Bad | 45 |
| No  | No  | No  | No | No | No  | 20 Good | 0  |
| No  | No  | No  | No | No | No  | 35 Good | 0  |
| No  | Yes | No  | No | No | No  | 20 Good | 0  |
| No  | No  | No  | No | No | No  | 60 Good | 45 |
| No  | No  | No  | No | No | No  | 30 Good | 0  |
| No  | No  | No  | No | No | No  | 30 Good | 0  |
| No  | No  | No  | No | No | No  | 30 Good | 0  |
| No  | No  | No  | No | No | No  | 30 Good | 0  |
| No  | No  | No  | No | No | No  | 45 Good | 6  |
| No  | No  | No  | No | No | No  | 90 Good | 0  |
| No  | Yes | Yes | No | No | No  | 30 Good | 4  |
| No  | Yes | Yes | No | No | No  | 90 Good | 45 |





|             |     |    |     |     |     |     |     |     |
|-------------|-----|----|-----|-----|-----|-----|-----|-----|
|             | No  | No | No  | Yes | N/A | N/A | N/A | N/A |
|             | No  | No | No  | Yes | N/A | N/A | N/A | N/A |
| Disposed/E  | No  | No | No  | Yes | N/A | No  | N/A | N/A |
| Disposed/E  | No  | No | No  | Yes | N/A | No  | N/A | N/A |
|             | No  | No | No  | Yes | No  | No  | No  | No  |
| Consume     | No  | No | No  | Yes | N/A | No  | N/A | N/A |
| Disposed/E  | No  | No | Yes | No  | N/A | N/A | N/A | N/A |
|             | No  | No | Yes | No  | N/A | N/A | N/A | N/A |
|             | No  | No | Yes | No  | N/A | N/A | N/A | N/A |
| Disposed/E  | No  | No | Yes | No  | Yes | No  | No  | No  |
|             | No  | No | Yes | No  | N/A | N/A | N/A | N/A |
|             | No  | No | No  | No  | No  | No  | No  | No  |
|             | No  | No | No  | No  | No  | No  | No  | No  |
|             | No  | No | No  | No  | No  | No  | No  | No  |
|             | No  | No | No  | Yes | No  | No  | No  | No  |
| Disposed/E  | No  | No | No  | No  | No  | No  | No  | No  |
| Disposed/E  | No  | No | No  | Yes | N/A | No  | N/A | N/A |
|             | No  | No | Yes | Yes | N/A | N/A | N/A | N/A |
|             | No  | No | Yes | Yes | N/A | N/A | N/A | N/A |
|             | No  | No | No  | No  | N/A | No  | N/A | N/A |
|             | No  | No | Yes | No  | N/A | N/A | N/A | N/A |
|             | No  | No | Yes | No  | N/A | N/A | N/A | N/A |
|             | No  | No | Yes | No  | No  | N/A | N/A | N/A |
|             | No  | No | No  | Yes | N/A | No  | N/A | N/A |
|             | No  | No | Yes | No  | N/A | N/A | N/A | N/A |
|             | No  | No | No  | Yes | N/A | No  | N/A | N/A |
|             | No  | No | No  | Yes | N/A | No  | N/A | N/A |
|             | No  | No | No  | Yes | N/A | No  | N/A | N/A |
|             | No  | No | No  | Yes | N/A | No  | N/A | N/A |
| Disposed/E  | No  | No | No  | Yes | N/A | No  | N/A | N/A |
| Disposed/E  | No  | No | No  | Yes | No  | No  | No  | No  |
| Disposed/E  | No  | No | No  | Yes | No  | No  | No  | No  |
|             | Yes | No | No  | Yes | Yes | No  | No  | No  |
|             | Yes | No | No  | No  | No  | Yes | No  | No  |
|             | Yes | No | No  | No  | Yes | No  | No  | No  |
|             | Yes | No | No  | No  | Yes | No  | No  | No  |
| Fed Poultry | Yes | No | No  | No  | Yes | No  | No  | No  |
|             | Yes | No | No  | No  | No  | Yes | No  | No  |
|             | Yes | No | No  | No  | Yes | No  | No  | No  |
| Disposed/E  | Yes | No | No  | No  | Yes | No  | No  | No  |
| Fed Poultry | Yes | No | No  | No  | Yes | No  | No  | No  |
|             | Yes | No | No  | No  | Yes | No  | No  | No  |
| Disposed/E  | Yes | No | No  | No  | Yes | No  | No  | No  |
|             | Yes | No | No  | No  | Yes | No  | No  | No  |
|             | Yes | No | No  | No  | Yes | No  | No  | No  |
|             | Yes | No | No  | No  | Yes | No  | No  | No  |

|                 |    |     |     |     |     |    |    |
|-----------------|----|-----|-----|-----|-----|----|----|
| Disposed/E Yes  | No | No  | No  | Yes | No  | No | No |
| Disposed/E Yes  | No | No  | No  | Yes | No  | No | No |
| Yes             | No | No  | No  | Yes | No  | No | No |
| Disposed/E Yes  | No | No  | No  | Yes | No  | No | No |
| Yes             | No | No  | No  | Yes | No  | No | No |
| Yes             | No | No  | No  | Yes | No  | No | No |
| Yes             | No | No  | No  | Yes | No  | No | No |
| Disposed/E Yes  | No | No  | No  | No  | Yes | No | No |
| Disposed/E Yes  | No | No  | No  | Yes | No  | No | No |
| Disposed/E Yes  | No | No  | Yes |     | Yes | No | No |
| Fed Poultry Yes | No | No  | No  |     | Yes | No | No |
| Disposed/E Yes  | No | No  | No  | No  | Yes | No | No |
| Disposed/E Yes  | No | No  | No  |     | No  | No | No |
| Disposed/E Yes  | No | No  | No  | No  | Yes | No | No |
| Disposed/E Yes  | No | No  | Yes | No  | Yes | No | No |
| Yes             | No | No  | No  | Yes | No  | No | No |
| Consume Yes     | No | No  | No  | Yes | No  | No | No |
| Disposed/E Yes  | No | No  | No  | Yes | No  | No | No |
| Disposed/E Yes  | No | No  | No  | Yes | No  | No | No |
| Disposed/E Yes  | No | Yes | No  | Yes | No  | No | No |
| Disposed/E Yes  | No | Yes | No  | Yes | No  | No | No |
| Disposed/E Yes  | No | Yes | No  | Yes | No  | No | No |
| Disposed/E Yes  | No | Yes | No  | Yes | No  | No | No |
| Disposed/E Yes  | No | No  | No  | Yes | No  | No | No |
| Disposed/E Yes  | No | Yes | No  | Yes | No  | No | No |
| Yes             | No | Yes | No  | Yes | No  | No | No |
| Yes             | No | Yes | No  | No  | No  | No | No |
| Disposed/E Yes  | No | No  | No  | No  | Yes | No | No |
| Yes             | No | Yes | No  | No  | Yes | No | No |
| Yes             | No | Yes | No  | No  | Yes | No | No |
| Yes             | No | No  | No  | Yes | No  | No | No |
| Yes             | No | No  | No  | Yes | Yes | No | No |
| Yes             | No | No  | No  | Yes | No  | No | No |
| Yes             | No | Yes | Yes | Yes | No  | No | No |
| Yes             | No | No  | No  | No  | Yes | No | No |
| Disposed/E Yes  | No | No  | No  | Yes | No  | No | No |
| Consume Yes     | No | No  | No  | Yes | No  | No | No |
| Yes             | No | Yes | Yes | Yes | No  | No | No |
| Yes             | No | No  | No  | Yes | No  | No | No |
| Yes             | No | No  | No  | Yes | Yes | No | No |
| Yes             | No | No  | No  | Yes | No  | No | No |
| Disposed/E Yes  | No | No  | No  | Yes | No  | No | No |
| Yes             | No | No  | No  | Yes | No  | No | No |
| Disposed/E Yes  | No | No  | No  | Yes | No  | No | No |
| Yes             | No | No  | No  | Yes | No  | No | No |
| Yes             | No | No  | No  | Yes | No  | No | No |
| Disposed/E Yes  | No | No  | No  | No  | Yes | No | No |



|             |     |    |    |     |     |     |     |     |
|-------------|-----|----|----|-----|-----|-----|-----|-----|
| Fed Poultry | Yes | No | No | No  | No  | Yes | No  | No  |
|             | Yes | No | No | No  | No  | Yes | No  | No  |
|             | Yes | No | No | No  | No  | Yes | No  | No  |
| Disposed/E  | Yes | No | No | No  | No  | Yes | No  | No  |
|             | Yes | No | No | No  | No  | Yes | No  | No  |
| Disposed/E  | Yes | No | No | No  | No  | Yes | No  | No  |
|             | Yes | No | No | No  | No  | Yes | No  | No  |
|             | Yes | No | No | No  | No  | Yes | No  | No  |
|             | Yes | No | No | No  | No  | Yes | No  | No  |
|             | Yes | No | No | No  | No  | Yes | No  | No  |
|             | Yes | No | No | No  | No  | Yes | No  | No  |
|             | Yes | No | No | No  | No  | Yes | No  | No  |
| Disposed/E  | Yes | No | No | Yes | No  | No  | No  | No  |
| Disposed/E  | Yes | No | No | No  | Yes | No  | No  | No  |
|             | Yes | No | No | No  | No  | No  | No  | No  |
| Disposed/E  | Yes | No | No | No  | No  | No  | No  | No  |
| Disposed/E  | Yes | No | No | No  | No  | No  | No  | No  |
| Disposed/E  | Yes | No | No | No  | No  | Yes | No  | No  |
| Disposed/E  | Yes | No | No | No  | Yes | No  | No  | No  |
|             | Yes | No | No | No  | No  | No  | No  | No  |
| Disposed/E  | Yes | No | No | No  | Yes | No  | No  | No  |
|             | Yes | No | No | No  | Yes | No  | No  | No  |
|             | Yes | No | No | No  | Yes | No  | No  | No  |
|             | Yes | No | No | No  | Yes | No  | No  | No  |
|             | Yes | No | No | No  | Yes | No  | No  | No  |
| Disposed/E  | Yes | No | No | No  | Yes | No  | No  | No  |
| Disposed/E  | Yes | No | No | No  | No  | Yes | No  | No  |
| Disposed/E  | Yes | No | No | No  | Yes | No  | No  | No  |
|             | Yes | No | No | Yes | No  | Yes | No  | No  |
| Disposed/E  | Yes | No | No | Yes | No  | No  | No  | Yes |
|             | Yes | No | No | Yes | Yes | No  | No  | No  |
| Fed cows    | Yes | No | No | No  | Yes | N/A | No  | No  |
| Disposed/E  | Yes | No | No | No  | Yes | No  | No  | No  |
| Disposed/E  | Yes | No | No | No  | No  | Yes | No  | No  |
| Disposed/E  | Yes | No | No | Yes | No  | Yes | No  | No  |
| Disposed/E  | Yes | No | No | No  | No  | Yes | No  | No  |
|             | Yes | No | No | Yes | No  | Yes | No  | No  |
|             | No  | No | No | Yes | N/A | N/A | N/A | N/A |
| Fed cows    | Yes | No | No | Yes | No  | Yes | No  | No  |
| Mix with gr | Yes | No | No | Yes | No  | No  | No  | Yes |
| Fed cows    | Yes | No | No | No  | Yes | No  | No  | No  |
| Fed cows    | Yes | No | No | No  | Yes | No  | No  | No  |
| Disposed/E  | No  | No | No | Yes | N/A | No  | N/A | N/A |
| Disposed/E  | No  | No | No | Yes | N/A | N/A | N/A | N/A |

|                 |    |    |     |     |     |     |     |
|-----------------|----|----|-----|-----|-----|-----|-----|
| Disposed/E Yes  | No | No | No  | Yes | No  | No  | No  |
| Yes             | No | No | Yes | No  | Yes | No  | No  |
| Disposed/E Yes  | No | No | No  | No  | Yes | No  | No  |
| Disposed/E Yes  | No | No | No  | Yes | No  | No  | No  |
| Fed Poultry Yes | No | No | No  | No  | Yes | No  | No  |
| Disposed/E Yes  | No | No | No  | No  | Yes | No  | No  |
| Fed cows Yes    | No | No | No  | No  | Yes | No  | No  |
| Fed cows Yes    | No | No | No  | Yes | No  | No  | No  |
| Disposed/E Yes  | No | No | Yes | No  | No  | No  | Yes |
| Disposed/E No   | No | No | Yes | N/A | N/A | N/A | N/A |
| No              | No | No | Yes | N/A | N/A | N/A | N/A |
| Yes             | No | No | No  | No  | Yes | No  | No  |
| Disposed/E Yes  | No | No | Yes | No  | Yes | No  | No  |
| Fed cows Yes    | No | No | No  | Yes | No  | No  | No  |
| Fed cows Yes    | No | No | No  | Yes | No  | No  | No  |
| Fed cows Yes    | No | No | No  | No  | Yes | No  | No  |
| Fed cows Yes    | No | No | No  | No  | Yes | No  | No  |
| Fed cows Yes    | No | No | No  | Yes | No  | No  | No  |
| Disposed/E Yes  | No | No | No  | Yes | No  | No  | No  |
| Yes             | No | No | No  | Yes | No  | No  | No  |
| Disposed/E Yes  | No | No | No  | Yes | No  | No  | No  |
| Yes             | No | No | No  | Yes | No  | No  | No  |
| Disposed/E Yes  | No | No | Yes | No  | No  | No  | No  |
| Disposed/E Yes  | No | No | No  | Yes | No  | No  | No  |
| Yes             | No | No | Yes | No  | No  | No  | No  |
| Fed cows Yes    | No | No | No  | No  | Yes | No  | No  |
| Sold Yes        | No | No | No  | No  | Yes | No  | No  |
| Disposed/E Yes  | No | No | No  | Yes | No  | No  | No  |
| Fed cows No     | No | No | Yes | N/A | N/A | N/A | N/A |
| Yes             | No | No | No  | No  | Yes | No  | No  |
| Yes             | No | No | No  | No  | Yes | No  | No  |
| Disposed/E Yes  | No | No | No  | Yes | Yes | No  | No  |
| Yes             | No | No | No  | Yes | No  | No  | No  |
| Disposed/E Yes  | No | No | Yes | Yes | No  | No  | No  |
| Disposed/E Yes  | No | No | No  | Yes | No  | No  | No  |
| Yes             | No | No | No  | No  | Yes | No  | No  |
| No              | No | No | Yes | N/A | N/A | N/A | N/A |
| Disposed/E No   | No | No | Yes | N/A | N/A | N/A | N/A |
| Disposed/E No   | No | No | Yes | N/A | N/A | N/A | N/A |
| Disposed/E Yes  | No | No | No  | Yes | No  | No  | No  |
| Yes             | No | No | Yes | Yes | No  | No  | No  |
| Yes             | No | No | Yes | No  | Yes | No  | No  |
| Disposed/E Yes  | No | No | Yes | No  | Yes | No  | No  |
| Fed cows Yes    | No | No | No  | No  | Yes | No  | No  |
| Disposed/E Yes  | No | No | No  | Yes | No  | No  | No  |
| Fed Poultry Yes | No | No | No  | No  | Yes | No  | No  |

|             |     |    |    |     |     |     |     |     |
|-------------|-----|----|----|-----|-----|-----|-----|-----|
| Disposed/E  | Yes | No | No | Yes | No  | No  | No  | Yes |
|             | Yes | No | No | No  | No  | Yes | No  | No  |
| Fed cows    | Yes | No | No | No  | No  | Yes | No  | No  |
| Disposed/E  | No  | No | No | Yes | N/A | No  | N/A | N/A |
|             | Yes | No | No | Yes | Yes | No  | No  | No  |
| Fed Poultry | Yes | No | No | No  | No  | Yes | No  | No  |
| Fed cows    | Yes | No | No | No  | No  | Yes | No  | No  |
| Disposed/E  | Yes | No | No | No  | Yes | No  | No  | No  |
|             | Yes | No | No | Yes | No  | Yes | No  | No  |
| Fed Poultry | Yes | No | No | No  | No  | Yes | No  | No  |
| Fed Poultry | Yes | No | No | No  | No  | Yes | No  | No  |
| Disposed/E  | No  | No | No | Yes | N/A | N/A | N/A | N/A |
|             | Yes | No | No | No  | Yes | No  | No  | No  |
| Fed cows    | No  | No | No | Yes | N/A | N/A | N/A | N/A |
| Fed cows    | No  | No | No | Yes | N/A | N/A | N/A | N/A |
|             | No  | No | No | Yes | N/A | No  | N/A | N/A |
|             | Yes | No | No | No  | Yes | No  | No  | No  |
|             | Yes | No | No | No  | No  | No  | No  | No  |
| Disposed/E  | Yes | No | No | No  | No  | Yes | No  | No  |
|             | Yes | No | No | Yes | No  | No  | No  | No  |
| Disposed/E  | Yes | No | No | No  | Yes | No  | No  | No  |
| Disposed/E  | Yes | No | No | No  | No  | Yes | No  | No  |
| Fed cows    | No  | No | No | Yes | N/A | N/A | N/A | N/A |
| Fed Poultry | No  | No | No | Yes | N/A | N/A | N/A | N/A |
| Disposed/E  | Yes | No | No | No  | Yes | No  | No  | No  |
|             | Yes | No | No | Yes | No  | Yes | No  | No  |
|             | Yes | No | No | Yes | No  | Yes | No  | No  |
|             | Yes | No | No | Yes | No  | Yes | No  | No  |
| Disposed/E  | Yes | No | No | Yes | No  | Yes | No  | No  |
| Fed Poultry | Yes | No | No | No  | No  | Yes | No  | No  |
| Used for Br | Yes | No | No | No  | No  | Yes | No  | No  |
| Consume     | Yes | No | No | No  | Yes | Yes | No  | No  |
| Fed cows    | Yes | No | No | No  | Yes | Yes | No  | No  |

| none_cont | other_cont | quantity_p | immediate | which_mor | many_mon | month_firs | month_last    | not_coveri |
|-----------|------------|------------|-----------|-----------|----------|------------|---------------|------------|
| No        | N/A        | 0          | 26        | November  | 30       | January    |               | Yes        |
| No        | N/A        | 90         | 12        | February  |          | February   | Still in stor | Yes        |
| No        | N/A        | 0          |           |           |          |            |               | No         |
| No        | N/A        | 90         | 3         | January   |          |            |               | No         |
| No        | N/A        | 90         | 5         | August    | 180      | August     | December      | No         |
| No        | N/A        | 45         | 2         | August    | 90       | August     | November      | No         |
| No        | N/A        | 90         | 8         | September | 270      | September  | May           | No         |
| No        | N/A        | 45         | 5         | August    | 210      | August     | March         | No         |
| No        | N/A        | 90         | 11        | August    | 270      | August     | April         | No         |
| No        | N/A        | 90         | 5         | August    | 150      | August     | January       | No         |
| No        | N/A        | 45         | 4         | July      | 150      | July       | December      | No         |
| No        | N/A        | 45         | 7         | July      | 240      | July       | February      | No         |
| No        | N/A        | 0          | 1         |           |          |            |               | No         |
| No        | N/A        | 90         | 7         | August    | 270      | September  | May           | No         |
| No        | N/A        | 90         | 4         | August    | 270      | September  | May           | No         |
| No        | N/A        | 90         | 7         | August    | 240      | August     | February      | No         |
| No        | N/A        | 45         | 4         | August    | 150      | August     | December      | No         |
| No        | N/A        | 90         | 3         | August    | 90       | August     | November      | No         |
| No        | N/A        | 90         | 3         | August    | 150      | August     | December      | No         |
| No        | N/A        | 90         | 3         | August    | 150      | August     | December      | No         |
| No        | N/A        | 90         | 5         | August    | 180      | August     | February      | No         |
| No        | N/A        | 90         | 9         | August    | 240      | August     | March         | No         |
| No        | N/A        | 90         | 7         | July      | 270      | July       | March         | No         |
| No        | N/A        | 45         | 2         | July      | 150      | July       | December      | No         |
| No        | N/A        | 45         | 6         | July      | 240      | July       | March         | No         |
| No        | N/A        | 45         | 3         | August    | 120      | August     | December      | No         |
| No        | N/A        | 275        | 2         | October   | 60       | October    | November      | No         |
| No        | N/A        | 90         | 1         | November  | 150      | December   | Still in stor | No         |
| No        | N/A        | 45         |           |           |          |            |               | No         |
| No        | N/A        | 10         | 5         | November  | 90       | November   | February      | No         |
| No        | N/A        | 720        | 3         | October   | 30       | November   | March         | No         |
| No        | N/A        | 0          |           | November  | 60       | December   |               | Yes        |
| No        | Agroz bags | 45         | 4         | December  | 60       | January    | February      | Yes        |
| No        | N/A        | 90         | 10        | November  | 30       | November   | March         | Yes        |
| No        | N/A        | 23         | 1         | December  | 90       | January    | March         | No         |
| No        | N/A        | 90         | 7         | December  | 30       | January    |               | Yes        |
| No        | N/A        | 45         | 7         | December  |          | December   | Still in stor | Yes        |
| No        | N/A        | 180        | 9         | September | 240      | September  | April         | No         |
| No        | N/A        | 90         | 7         | July      | 240      | July       | February      | No         |
| No        | N/A        | 90         | 6         | July      | 225      | July       | February      | No         |
| No        | N/A        | 90         | 4         | August    | 180      | August     | January       | No         |
| No        | N/A        | 180        | 8         | August    | 270      | August     | April         | No         |
| No        | N/A        | 45         | 2         | August    | 120      | August     | December      | No         |
| No        | N/A        | 90         | 13        | August    | 300      | August     | May           | No         |
| No        | N/A        | 90         | 8         | July      | 270      | July       | March         | No         |
| No        | N/A        | 45         | 6         | November  | 210      | November   | June          | No         |

|     |            |     |              |               |               |     |
|-----|------------|-----|--------------|---------------|---------------|-----|
| No  | N/A        | 90  | 4 August     | 150 August    | December      | No  |
| No  | N/A        | 45  | 4 August     | 120 August    | November      | No  |
| No  | N/A        | 90  | 7 August     | 180 August    | January       | No  |
| No  | N/A        | 180 |              |               |               | No  |
| No  | N/A        | 45  | 2 August     | 150 August    | December      | No  |
| No  | N/A        | 180 | 12 September | 210 September | March         | No  |
| No  | N/A        | 90  | 5 September  | 240 September | May           | No  |
| No  | N/A        | 45  | 4 July       | 210 July      | February      | No  |
| No  | N/A        | 180 | 2 September  | 60 January    |               | No  |
| No  | N/A        | 0   | 18 December  | 180 December  |               | No  |
| No  | N/A        | 0   | 3 November   | 90 November   | January       | No  |
| No  | N/A        | 90  | 15 November  | 150 December  | Still in stor | No  |
| No  | N/A        | 90  | 3 November   | 30 December   | February      | No  |
| No  | N/A        | 16  | 5 October    | 30 November   | Still in stor | No  |
| No  | N/A        | 16  | 4 November   | 15 January    | Still in stor | No  |
| No  | N/A        | 90  | 8 November   | 120 January   | Still in stor | No  |
| No  | N/A        | 0   |              |               |               | Yes |
| No  | N/A        | 0   |              |               |               | Yes |
| No  | N/A        | 90  | 4 October    | 120           |               | Yes |
| No  | N/A        | 0   |              |               |               | Yes |
| No  | N/A        | 108 | 7 November   | 60            | January       | Yes |
| No  | N/A        | 450 | 15 December  | 120 March     |               | Yes |
| No  | N/A        | 90  | 16 October   | 30 December   | Still in stor | Yes |
| No  | N/A        | 540 | 14 October   | 30 January    |               | Yes |
| No  | N/A        | 180 | 10 January   | February      |               | Yes |
| No  | N/A        | 90  | 12 December  | 30 January    |               | Yes |
| No  | N/A        | 180 | 19 November  | 60 January    |               | Yes |
| No  | N/A        | 180 | 19 November  | 30 January    |               | Yes |
| No  | N/A        | 90  | 12 December  | 30 January    |               | Yes |
| No  | N/A        | 180 | 10 January   | February      |               | Yes |
| No  | N/A        | 180 | 10 January   | February      |               | Yes |
| No  | Agroz bags | 450 | 7 December   | December      | Still in stor | No  |
| No  | N/A        | 45  | 3 December   | December      | Still in stor | Yes |
| No  | N/A        | 90  | 7 October    | October       | Still in stor | Yes |
| No  | N/A        | 90  | 10 November  | November      | Still in stor | Yes |
| No  | N/A        | 90  | 3 October    | 90 October    | April         | Yes |
| No  | N/A        | 180 | 5 November   | 90 November   | April         | Yes |
| No  | N/A        | 45  | 13 December  | December      | Still in stor | Yes |
| No  | Agroz bags | 0   | 1 April      | 30 April      | March         | No  |
| No  | N/A        | 0   |              |               |               | Yes |
| No  | N/A        | 0   |              |               |               | No  |
| No  | N/A        | 0   | 2 December   | 30 January    | February      | Yes |
| No  | N/A        | 180 | 5 April      | 30 April      | May           | No  |
| No  | N/A        | 0   | 1            | 60            |               | No  |
| No  | N/A        | 0   | 1            |               |               | No  |
| Yes | N/A        | 10  | 1 April      | 120 April     | April         | Yes |
| No  | Agroz bags | 0   | 2 March      | 120 April     |               | No  |

|     |            |     |            |             |                |     |
|-----|------------|-----|------------|-------------|----------------|-----|
| No  | N/A        | 45  | 16         |             |                | No  |
| No  | Agroz bags | 15  | 2 March    | 75          |                | No  |
| No  | N/A        | 10  | 26         | 120         | Still in store | Yes |
| No  | N/A        | 5   | 1          | 15          |                | No  |
| No  | Agroz bags | 0   | 90         |             | January        | No  |
| No  | N/A        | 113 | 1          | 7           |                | Yes |
| No  | N/A        | 450 |            |             |                | Yes |
| No  | N/A        | 0   |            |             |                | No  |
| No  | N/A        | 0   |            |             |                | Yes |
| No  | N/A        | 0   |            |             |                | Yes |
| No  | N/A        | 0   |            |             |                | No  |
| No  | N/A        | 0   |            |             | March          | No  |
| No  | N/A        | 0   |            |             |                | No  |
| No  | N/A        | 0   |            |             |                | Yes |
| No  | N/A        | 0   | 30 April   | 90 April    | January        | No  |
| No  | Agroz bags | 0   | 30 April   | 330 April   | Still in store | No  |
| No  | N/A        | 900 | 80 March   | 30 March    | April          | No  |
| No  | N/A        | 0   | 1          | 7           |                | No  |
| No  | N/A        | 0   | 4          |             |                | Yes |
| Yes | N/A        | 0   | 4          | 30          |                | No  |
| No  | N/A        | 0   | 1          | 120         |                | No  |
| No  | N/A        | 0   | 30         | 30          |                | No  |
| No  | N/A        | 0   | 2          |             |                | No  |
| No  | N/A        | 0   | 1 February | March       | March          | No  |
| No  | N/A        | 0   | 1 March    | March       | Still in store | Yes |
| No  | N/A        | 450 | 6 February | 90 February | Still in store | Yes |
| No  | N/A        | 0   | 1 February | 30 February | March          | Yes |
| No  | N/A        | 0   | 4 November | 90 November | February       | Yes |
| No  | N/A        | 90  | 9          |             |                | Yes |
| No  | N/A        | 180 | 4 February | 90 February | Still in store | Yes |
| No  | N/A        | 0   | 1 March    | 90          |                | No  |
| No  | N/A        | 0   | 1 March    | 30 March    | April          | Yes |
| No  | N/A        | 2   | 1 March    | 30 March    | Still in store | Yes |
| No  | N/A        | 0   | 2 August   | 30 May      |                | No  |
| No  | N/A        | 0   | 4 April    | 60 April    | May            | No  |
| No  | N/A        | 0   |            |             |                | No  |
| No  | N/A        | 0   | 3 March    | 30 April    | April          | No  |
| No  | N/A        | 0   |            |             |                | No  |
| No  | N/A        | 0   | 20         |             |                | No  |
| No  | N/A        | 0   | 90 April   | 120 April   | May            | Yes |
| No  | N/A        | 3   | 60 April   | 120 April   |                | Yes |
| No  | N/A        | 2   | 40 April   | 120 April   |                | Yes |
| No  | N/A        | 10  | 20 May     | 150 May     |                | Yes |
| No  | N/A        | 2   | 1 April    | 120 April   | May            | No  |
| No  | N/A        | 0   | 0          |             |                | No  |
| No  | N/A        | 10  | 1 April    | 120 April   |                | No  |
| No  | N/A        | 20  | 5 April    | 120 April   |                | Yes |

|    |            |     |             |              |               |     |
|----|------------|-----|-------------|--------------|---------------|-----|
| No | N/A        | 0   | 5 April     | 30 May       |               | No  |
| No | N/A        | 0   | 4 April     | 30 April     | May           | No  |
| No | N/A        | 0   | 2 April     | 30 May       |               | No  |
| No | N/A        | 0   |             |              |               | No  |
| No | N/A        | 0   | 1           |              |               | No  |
| No | N/A        | 0   | 1           |              |               | No  |
| No | N/A        | 0   |             |              |               | No  |
| No | N/A        | 23  | 3           | 180          |               | Yes |
| No | N/A        | 45  | 1           | 60           |               | Yes |
| No | Agroz bags | 0   | 6           | 75           | Still in stor | Yes |
| No | Agroz bags | 3   | 1           |              | Still in stor | Yes |
| No | N/A        | 45  | 2           |              | Still in stor | Yes |
| No | Agroz bags | 0   | 1           | 60           |               | Yes |
| No | N/A        | 2   | 2 April     | 120          |               | No  |
| No | N/A        | 0   | 4 November  | 120 November | May           | No  |
| No | N/A        | 0   |             | 0            |               | No  |
| No | N/A        | 4   | 2           | 45           |               | Yes |
| No | N/A        | 0   | 1 December  | 60 December  | December      | Yes |
| No | N/A        | 10  | 2 December  | 60 January   | January       | Yes |
| No | N/A        | 0   | December    | 30 January   | February      | Yes |
| No | N/A        | 0   |             |              |               | Yes |
| No | N/A        | 0   |             |              |               | Yes |
| No | N/A        | 0   | December    | 30 January   | February      | Yes |
| No | N/A        | 0   |             |              |               | Yes |
| No | N/A        | 0   | 1 December  | 30 January   |               | Yes |
| No | N/A        | 0   | 1           |              |               | Yes |
| No | N/A        | 0   |             |              |               | Yes |
| No | N/A        | 0   |             |              |               | No  |
| No | N/A        | 20  | 60 March    | 30 March     | April         | Yes |
| No | N/A        | 36  | 8           |              |               | No  |
| No | N/A        | 0   | 7           |              |               | Yes |
| No | N/A        | 0   | 5           |              |               | Yes |
| No | N/A        | 0   | 1           |              |               | No  |
| No | Agroz bags | 0   | 12          |              |               | Yes |
| No | Agroz bags | 0   | 5           |              |               | Yes |
| No | N/A        | 10  | 1 February  | 60 February  | March         | Yes |
| No | N/A        | 5   | 1 February  | 30 February  | March         | Yes |
| No | N/A        | 0   | 1 January   | 60 January   | February      | No  |
| No | N/A        | 0   | 1 February  | 45 February  | March         | Yes |
| No | N/A        | 30  | 270 June    | 90 July      | October       | No  |
| No | N/A        | 40  | 200         |              |               | No  |
| No | N/A        | 450 | 2 March     | 30 March     | April         | Yes |
| No | Agroz bags | 5   | 2 February  | 180          |               | Yes |
| No | N/A        | 5   | 2 February  | 90 February  | Still in stor | Yes |
| No | N/A        | 10  | 30          | 60           | Still in stor | Yes |
| No | N/A        | 90  | 4 February  | 60 February  | April         | No  |
| No | N/A        | 270 | 12 February | February     | Still in stor | Yes |

|    |            |     |             |               |               |     |
|----|------------|-----|-------------|---------------|---------------|-----|
| No | N/A        | 0   | 2 March     | 60 March      | April         | Yes |
| No | Agroz bags | 45  | 4 March     | 60 March      | Still in stor | Yes |
| No | N/A        | 7   | 1 February  | 90 February   | April         | Yes |
| No | N/A        | 40  | 3 February  | 4 February    | Still in stor | Yes |
| No | N/A        | 36  | 3 February  | 60 February   | Still in stor | Yes |
| No | N/A        | 135 | 0 February  | 90 February   | Still in stor | Yes |
| No | N/A        | 24  | 8 February  | 60 February   | Still in stor | Yes |
| No | N/A        | 0   | 3 February  | 90 February   | Still in stor | Yes |
| No | Agroz bags | 3   | 2 February  | 60 February   | April         | Yes |
| No | N/A        | 0   | 1 February  | 30 February   | April         | Yes |
| No | N/A        | 0   | 2 March     | March         | Still in stor | Yes |
| No | N/A        | 90  | 1 February  | 30 February   | Still in stor | Yes |
| No | N/A        | 0   | 1 March     | 60 March      | April         | Yes |
| No | Agroz bags | 5   | 2 February  | 60 February   |               | Yes |
| No | N/A        | 20  | 1 February  | February      | December      | Yes |
| No | Agroz bags | 40  | 1 February  | 180 September | December      | Yes |
| No | Agroz bags | 45  | 2 March     | 90            |               | Yes |
| No | Agroz bags | 0   | 1 March     |               | Still in stor | Yes |
| No | N/A        | 270 | 2 February  | February      | Still in stor | Yes |
| No | N/A        | 23  | 2 February  | February      | Still in stor | Yes |
| No | N/A        | 0   | 4 March     |               | Still in stor | Yes |
| No | Agroz bags | 0   | 1 February  | February      | Still in stor | Yes |
| No | N/A        | 90  | 2 March     | 60 March      | April         | Yes |
| No | N/A        | 0   | 3 February  | 90 March      | Still in stor | Yes |
| No | N/A        | 0   | 2 February  | February      | March         | Yes |
| No | N/A        | 0   | 5 February  | April         | September     | Yes |
| No | Agroz bags | 0   | 26 March    | 150           | December      | Yes |
| No | N/A        | 0   | 1 March     | 150           | January       | Yes |
| No | N/A        | 0   |             |               |               | No  |
| No | N/A        | 90  | 160 January | 90 February   |               | Yes |
| No | N/A        | 23  | 25 December | 180 December  |               | No  |
| No | N/A        | 0   | 35 December | 150 December  | Still in stor | No  |
| No | N/A        | 360 | 50 December | 270 February  |               | Yes |
| No | N/A        | 0   | 54 December | 210 January   |               | No  |
| No | N/A        | 90  | 20 November | 150 December  | Still in stor | No  |
| No | N/A        | 450 | 25 November | 150 December  | Still in stor | No  |
| No | N/A        | 68  | 20 November | 150 January   | Still in stor | No  |
| No | N/A        | 90  | 20 November | 90 January    | Still in stor | No  |
| No | N/A        | 135 | 28 November | 120 January   | Still in stor | No  |
| No | N/A        | 0   | 30 April    | 30            | May           | No  |
| No | N/A        | 90  | 12 August   | 150 August    | December      | No  |
| No | N/A        | 45  | 30 December | 210 January   | Still in stor | Yes |
| No | N/A        | 90  | 10 January  | 120 January   |               | Yes |
| No | N/A        | 180 | 10 November | November      | Still in stor | Yes |
| No | N/A        | 90  | 9 November  | November      | Still in stor | Yes |
| No | N/A        | 0   | 2 March     |               | Still in stor | No  |
| No | N/A        | 0   | 24 November | 90 November   | February      | No  |



|    |     |     |              |              |               |  |     |
|----|-----|-----|--------------|--------------|---------------|--|-----|
| No | N/A | 90  | 30           |              |               |  | Yes |
| No | N/A | 0   | 40 December  | 180 December | Still in stor |  | No  |
| No | N/A | 270 | 150 November | 225 March    | November      |  | Yes |
| No | N/A | 90  | 50 November  | 120 December | Still in stor |  | No  |
| No | N/A | 45  | 28 November  | 30 December  | Still in stor |  | No  |
| No | N/A | 90  | 30 October   | 120 January  | Still in stor |  | No  |
| No | N/A | 135 | 30 November  | 60 March     |               |  | Yes |
| No | N/A | 180 | 32 February  | 120 June     |               |  | Yes |
| No | N/A | 135 | 74 November  | 240 February |               |  | Yes |
| No | N/A | 0   | 30 November  | 150 December | Still in stor |  | No  |
| No | N/A | 360 | 10 December  | 120 December | March         |  | No  |
| No | N/A | 135 | 10 July      | 240 August   | February      |  | No  |
| No | N/A | 45  | 13 December  | 270 December |               |  | Yes |
| No | N/A | 16  | 7 November   | 150 December | February      |  | No  |
| No | N/A | 180 | 8 October    | 90           | January       |  | Yes |
| No | N/A | 90  | 12 December  | March        |               |  | Yes |
| No | N/A | 450 | 3 October    | October      | October       |  | Yes |
| No | N/A | 0   | 5 November   | November     | Still in stor |  | Yes |
| No | N/A | 0   |              |              | Still in stor |  | Yes |
| No | N/A | 0   | 20 December  | 30 February  | April         |  | Yes |
| No | N/A | 45  | 38           |              |               |  | Yes |
| No | N/A | 0   | 40 November  | 120 November | February      |  | No  |
| No | N/A | 0   |              |              |               |  | No  |
| No | N/A | 0   | 40 November  | 120 November | Still in stor |  | No  |
| No | N/A | 0   |              |              |               |  | No  |
| No | N/A | 180 | 38 November  | 30           | February      |  | No  |
| No | N/A | 0   | 47 November  | 30 January   |               |  | Yes |
| No | N/A | 3   | 10 March     | March        | April         |  | No  |
| No | N/A | 0   | September    | 90 October   | December      |  | No  |
| No | N/A | 180 | 14 July      | 300 July     | May           |  | No  |
| No | N/A | 90  | 14 August    | 330 August   | June          |  | No  |
| No | N/A | 0   | 5 August     | 30 May       | May           |  | No  |
| No | N/A | 0   | 6 April      | 30 May       | May           |  | No  |
| No | N/A | 40  | 5 March      | 180 November | January       |  | No  |
| No | N/A | 90  | 14 November  | 210 December |               |  | No  |
| No | N/A | 0   | 40 November  | December     | Still in stor |  | No  |
| No | N/A | 135 | 56 November  | 30 January   | March         |  | Yes |
| No | N/A | 0   | 20 November  | 150 December | Still in stor |  | No  |
| No | N/A | 90  | 25 November  | 120 December | Still in stor |  | No  |
| No | N/A | 450 | 10 December  | 60 January   | Still in stor |  | No  |
| No | N/A | 90  | 20           |              |               |  | Yes |
| No | N/A | 0   | 22 December  | 180 December |               |  | No  |
| No | N/A | 0   | 30 November  | 150 December | Still in stor |  | No  |
| No | N/A | 0   | 34 November  | 210 January  |               |  | Yes |
| No | N/A | 14  | 10 November  | 150 December | Still in stor |  | No  |
| No | N/A | 60  | 10 November  | 120 November | April         |  | No  |
| No | N/A | 16  | October      | 30 November  | Still in stor |  | No  |

|    |            |     |             |              |               |     |
|----|------------|-----|-------------|--------------|---------------|-----|
| No | N/A        | 90  | 8 November  | 60 December  | April         | No  |
| No | N/A        | 0   |             |              |               | Yes |
| No | N/A        | 450 | 30 November | 90 February  | September     | Yes |
| No | N/A        | 0   | 10 March    | 90           | Still in stor | No  |
| No | N/A        | 189 | 21 December | 180 December |               | No  |
| No | N/A        | 90  | 8 October   | 90 December  | March         | No  |
| No | N/A        | 180 | 5 September | 30           | Still in stor | Yes |
| No | N/A        | 180 | 29          |              |               | Yes |
| No | N/A        | 0   | 23 November | 150 December | Still in stor | No  |
| No | N/A        | 135 | 14 December | 30 January   |               | Yes |
| No | N/A        | 135 | 14 December | 30 January   |               | Yes |
| No | N/A        | 0   | 20 November | 120 November | Still in stor | No  |
| No | N/A        | 0   | 15 March    | 60 April     | April         | No  |
| No | N/A        | 16  | 3 November  | 150 December |               | No  |
| No | N/A        | 540 | 9           | August       | January       | No  |
| No | N/A        | 0   | 5 April     | April        | Still in stor | Yes |
| No | N/A        | 0   | 5 April     | 30 May       | May           | No  |
| No | N/A        | 0   | 100         | 90           |               | No  |
| No | N/A        | 90  | 4 March     | 30 March     | Still in stor | Yes |
| No | Agroz bags | 0   | 3 April     | 30 April     | Still in stor | Yes |
| No | N/A        | 68  | 10 March    | March        | Still in stor | Yes |
| No | N/A        | 450 | 8           | 120          |               | Yes |
| No | N/A        | 60  | 20 November | 90 November  | January       | No  |
| No | N/A        | 16  | 15 November | 150 January  | Still in stor | No  |
| No | N/A        | 0   | 30 December | 120 December |               | No  |
| No | N/A        | 0   | 30 December | 150 November | Still in stor | No  |
| No | N/A        | 0   | 26 December | 150 December | Still in stor | No  |
| No | N/A        | 0   | 40 November | 150 November | Still in stor | No  |
| No | N/A        | 0   | 40 November | 270 December |               | Yes |
| No | N/A        | 270 | 5 December  | 150 March    | June          | Yes |
| No | N/A        | 90  | 20 December | December     |               | Yes |
| No | N/A        | 90  | 10 November | November     |               | Yes |
| No | N/A        | 720 | 50 December | December     | Still in stor | Yes |

| covering_w | bring_hom | commercia | green_mai | dry_off_gr | keep_maiz | shelling_dr | method_dr  | dehusked_ |
|------------|-----------|-----------|-----------|------------|-----------|-------------|------------|-----------|
| No         | No        | No        | No        | No         | 30        | 4           | Sun drying | Never     |
| Yes        | No        | No        | Yes       | Yes        | 30        | 2           | Sun drying | Frequent  |
| No         | No        | No        | Yes       | No         | 7         | 15          | Sun drying | Never     |
| No         | Yes       | No        | No        | No         | 21        | 1           | Airing     | Never     |
| No         | Yes       | No        | No        | No         | 14        | 1           | Airing     | Never     |
| No         | Yes       | No        | No        | No         | 37        | 14          | Airing     | Never     |
| No         | Yes       | No        | No        | No         | 7         | 7           | Airing     | Never     |
| No         | Yes       | No        | No        | No         | 14        | 7           | Airing     | Never     |
| No         | Yes       | No        | No        | No         | 14        | 7           | Airing     | Never     |
| No         | Yes       | No        | No        | No         | 7         | 4           | Airing     | Never     |
| No         | Yes       | No        | No        | No         | 7         | 2           | Sun drying | One week  |
| No         | Yes       | No        | No        | No         | 7         | 14          | Sun drying | Never     |
| No         | Yes       | No        | No        | No         | 7         | 1           | Airing     | Never     |
| No         | Yes       | No        | No        | No         | 7         | 4           | Sun drying | Never     |
| No         | Yes       | No        | No        | No         | 7         | 14          | Sun drying | Never     |
| No         | Yes       | No        | No        | No         | 7         | 4           | Airing     | Never     |
| No         | Yes       | No        | No        | No         | 1         | 3           | Sun drying | Never     |
| No         | Yes       | No        | No        | No         | 3         | 7           | Airing     | Never     |
| No         | Yes       | No        | No        | No         | 4         | 7           | Airing     | Never     |
| No         | Yes       | No        | No        | No         | 4         | 2           | Airing     | Never     |
| No         | Yes       | No        | No        | No         | 7         | 7           | Sun drying | Never     |
| No         | Yes       | No        | No        | No         | 7         | 7           | Sun drying | Never     |
| No         | Yes       | No        | No        | No         | 14        | 7           | Sun drying | Never     |
| No         | Yes       | No        | No        | No         | 4         | 2           | Sun drying | Never     |
| No         | Yes       | No        | No        | No         | 7         | 4           | Sun drying | Never     |
| No         | Yes       | No        | No        | No         | 4         | 3           | Airing     | Never     |
| No         | Yes       | No        | Yes       | No         | 30        | 21          | Sun drying | Always    |
| No         | Yes       | No        | No        | No         | 90        | 2           | Sun drying | Never     |
| No         | Yes       | No        | No        | No         | 30        | 3           | Sun drying | Never     |
| No         | No        | No        | Yes       | Yes        | 90        | 1           | Sun drying | Frequent  |
| No         | Yes       | No        | No        | No         | 30        | 2           | Sun drying | Never     |
| No         | No        | No        | No        | No         | 60        | 7           | Sun drying | Never     |
| No         | No        | No        | No        | No         | 30        | 3           | Sun drying | Never     |
| No         | No        | No        | No        | No         | 30        | 3           | Sun drying | Never     |
| Yes        | No        | No        | No        | No         | 60        | 7           | Sun drying | One month |
| No         | No        | No        | No        | No         | 30        | 5           | Sun drying | One month |
| Yes        | No        | No        | Yes       | Yes        | 30        | 14          | Sun drying | Frequent  |
| No         | Yes       | No        | No        | No         | 12        | 2           | Airing     | Never     |
| No         | Yes       | No        | No        | No         | 35        | 4           | Airing     | Never     |
| No         | Yes       | No        | No        | No         | 14        | 4           | Airing     | Never     |
| No         | Yes       | No        | No        | No         | 28        | 1           | Airing     | Never     |
| No         | Yes       | No        | No        | No         | 7         | 1           | Airing     | One week  |
| No         | Yes       | No        | No        | No         | 7         | 21          | Airing     | Never     |
| No         | Yes       | No        | No        | No         | 7         | 6           | Airing     | Never     |
| No         | Yes       | No        | No        | No         | 21        | 7           | Sun drying | One week  |
| No         | Yes       | No        | No        | No         | 14        | 7           | Airing     | Never     |

|     |     |    |     |     |     |               |           |
|-----|-----|----|-----|-----|-----|---------------|-----------|
| No  | Yes | No | No  | No  | 7   | 4 Airing      | Never     |
| No  | Yes | No | No  | No  | 7   | 14 Sun drying | Never     |
| No  | Yes | No | No  | No  | 7   | 7 Airing      | Never     |
| No  | Yes | No | No  | No  | 30  | 7 Sun drying  | Never     |
| No  | Yes | No | No  | No  | 1   | 7 Sun drying  | Never     |
| No  | Yes | No | No  | No  | 14  | 14 Airing     | Never     |
| No  | Yes | No | No  | No  | 21  | 7 Airing      | Never     |
| No  | Yes | No | No  | No  | 1   | 1 Sun drying  | Never     |
| No  | Yes | No | No  | No  | 7   | 14 Sun drying | Never     |
| Yes | Yes | No | No  | No  | 14  | 14 Sun drying | Never     |
| No  | No  | No | Yes | Yes | 7   | 7 Sun drying  | Frequent  |
| No  | Yes | No | No  | No  | 90  | 2 Sun drying  | Never     |
| No  | Yes | No | No  | No  | 30  | 2 Sun drying  | Never     |
| No  | Yes | No | No  | No  | 30  | 2 Sun drying  | Never     |
| No  | Yes | No | No  | No  | 14  | 3 Sun drying  | Never     |
| No  | Yes | No | No  | No  | 120 | 3 Sun drying  | Never     |
| No  | No  | No | No  | No  | 30  | 14 Sun drying | Never     |
| No  | No  | No | No  | No  | 7   | 14 Sun drying | Never     |
| No  | No  | No | No  | No  | 14  | 14 Sun drying | Never     |
| No  | No  | No | No  | No  | 30  | 3 Sun drying  | Never     |
| No  | No  | No | No  | No  | 60  | 7 Sun drying  | Two Month |
| No  | No  | No | No  | No  | 14  | 30 Sun drying | Never     |
| No  | No  | No | No  | No  | 30  | 10 Sun drying | Never     |
| No  | No  | No | No  | No  | 7   | 7 Sun drying  | One month |
| No  | No  | No | No  | No  | 2   | 5 Sun drying  | Never     |
| No  | No  | No | No  | No  | 30  | 3 Sun drying  | One month |
| No  | No  | No | No  | No  | 30  | 5 Sun drying  | One week  |
| No  | No  | No | No  | No  | 30  | 4 Sun drying  | One month |
| No  | No  | No | No  | No  | 30  | 3 Sun drying  | One month |
| No  | No  | No | No  | No  | 5   | 5 Sun drying  | Never     |
| No  | No  | No | No  | No  | 2   | 5 Sun drying  | Never     |
| No  | Yes | No | Yes | Yes | 30  | 5 Sun drying  | Frequent  |
| No  | Yes | No | Yes | Yes | 30  | 2 Sun drying  | Never     |
| No  | No  | No | Yes | Yes | 14  | 3 Sun drying  | Frequent  |
| Yes | No  | No | Yes | Yes | 60  | 2 Sun drying  | Frequent  |
| No  | No  | No | Yes | Yes | 2   | 14 Sun drying | Never     |
| Yes | No  | No | Yes | Yes | 30  | 5 Sun drying  | Frequent  |
| Yes | No  | No | Yes | Yes | 30  | 2 Sun drying  | Frequent  |
| Yes | No  | No | No  | No  | 7   | 14 Sun drying | Never     |
| No  | No  | No | No  | No  | 0   | 30 Sun drying | Never     |
| Yes | No  | No | No  | No  | 20  | 4 Sun drying  | Never     |
| No  | No  | No | No  | No  | 60  | 30 Sun drying | One month |
| No  | Yes | No | No  | No  | 14  | 30 Sun drying | Never     |
| No  | Yes | No | Yes | Yes | 30  | 7 Sun drying  | Never     |
| No  | Yes | No | Yes | Yes | 30  | 7 Sun drying  | Frequent  |
| Yes | Yes | No | No  | Yes | 30  | 30 Airing     | Never     |
| Yes | Yes | No | No  | Yes | 30  | 30 Airing     | Never     |

|     |     |     |     |     |     |               |          |
|-----|-----|-----|-----|-----|-----|---------------|----------|
| No  | Yes | No  | No  | Yes | 0   | 2 Sun drying  | Never    |
| No  | No  | No  | No  | Yes | 60  | 3 Sun drying  | Never    |
| Yes | No  | No  | Yes | Yes | 120 | 2 Sun drying  | Frequent |
| No  | No  | No  | Yes | Yes | 30  | 7 Sun drying  | Frequent |
| No  | Yes | Yes | No  | No  | 0   | 30 Sun drying | Never    |
| Yes | No  | No  | Yes | Yes | 30  | 3 Sun drying  | Never    |
| No  | No  | No  | No  | Yes | 7   | 3 Airing      | Frequent |
| No  | No  | No  | Yes | No  | 14  | 2 Sun drying  | Frequent |
| No  | Yes | No  | No  | No  | 42  | 7 Sun drying  | Frequent |
| No  | No  | No  | No  | No  | 21  | 7 Sun drying  | One week |
| Yes | No  | No  | Yes | No  | 20  | 4 Sun drying  | Frequent |
| Yes | Yes | No  | No  | Yes | 21  | 2 Sun drying  | Never    |
| Yes | Yes | No  | Yes | Yes | 30  | 21 Sun drying | Frequent |
| No  | Yes | No  | Yes | Yes | 7   | 21 Sun drying | Never    |
| Yes | Yes | No  | No  | Yes | 0   | 30 Sun drying | Never    |
| Yes | Yes | No  | No  | Yes | 0   | 30 Sun drying | Never    |
| Yes | Yes | No  | No  | No  | 30  | 21 Sun drying | Never    |
| Yes | No  | No  | No  | No  | 7   | 7 Airing      | Frequent |
| No  | No  | No  | No  | Yes | 21  | 3 Sun drying  | Frequent |
| Yes | No  | No  | No  | Yes | 14  | 7 Airing      | Frequent |
| Yes | No  | No  | No  | No  | 7   | 14 Airing     | Frequent |
| Yes | No  | No  | No  | No  | 7   | 14 Airing     | Frequent |
| Yes | Yes | No  | Yes | No  | 21  | 21 Airing     | Frequent |
| No  | No  | No  | Yes | Yes | 14  | 14 Sun drying | Never    |
| No  | No  | No  | Yes | Yes | 21  | 2 Sun drying  | Never    |
| Yes | No  | No  | Yes | Yes | 30  | 7 Sun drying  | Never    |
| Yes | No  | No  | Yes | Yes | 30  | 2 Sun drying  | Never    |
| Yes | No  | No  | Yes | Yes | 14  | 7 Sun drying  | Frequent |
| Yes | No  | No  | Yes | Yes | 14  | 7 Sun drying  | Frequent |
| No  | No  | No  | Yes | Yes | 60  | 7 Sun drying  | Frequent |
| No  | No  | No  | Yes | Yes | 30  | 1 Sun drying  | Never    |
| No  | No  | No  | Yes | Yes | 30  | 1 Sun drying  | Never    |
| Yes | No  | No  | Yes | Yes | 30  | 7 Sun drying  | Always   |
| No  | Yes | No  | No  | No  | 1   | 1 Sun drying  | Never    |
| No  | Yes | No  | No  | No  | 14  | 30 Sun drying | Never    |
| No  | Yes | No  | No  | No  | 0   | 7 Sun drying  | Never    |
| No  | Yes | No  | No  | No  | 14  | 30 Sun drying | Never    |
| Yes | No  | No  | No  | No  | 30  | 14 Airing     | Never    |
| Yes | No  | No  | No  | No  | 7   | 7 Airing      | Never    |
| Yes | Yes | No  | No  | Yes | 30  | 30 Sun drying | Never    |
| Yes | Yes | No  | No  | Yes | 30  | 30 Sun drying | Never    |
| Yes | Yes | No  | No  | Yes | 30  | 30 Sun drying | Never    |
| No  | Yes | No  | No  | Yes | 30  | 30 Sun drying | Never    |
| Yes | Yes | No  | No  | Yes | 30  | 30 Sun drying | Never    |
| Yes | Yes | No  | No  | Yes | 30  | 30 Sun drying | Never    |
| Yes | No  | No  | Yes | Yes | 30  | 30 Sun drying | Never    |
| Yes | Yes | No  | No  | Yes | 30  | 30 Airing     | Never    |

|     |     |     |     |     |     |               |           |
|-----|-----|-----|-----|-----|-----|---------------|-----------|
| No  | Yes | No  | No  | No  | 30  | 30 Sun drying | Never     |
| No  | Yes | No  | No  | No  | 30  | 21 Sun drying | Never     |
| No  | Yes | No  | No  | No  | 30  | 14 Sun drying | Never     |
| No  | Yes | No  | No  | No  | 30  | 30 Sun drying | Never     |
| No  | Yes | No  | No  | No  | 45  | 21 Sun drying | Never     |
| No  | Yes | No  | No  | No  | 60  | 30 Sun drying | Never     |
| No  | Yes | No  | No  | No  | 0   | 0 Sun drying  | Never     |
| Yes | No  | No  | Yes | Yes | 30  | 7 Sun drying  | Never     |
| Yes | No  | No  | Yes | Yes | 30  | 7 Sun drying  | Frequent  |
| Yes | No  | No  | Yes | Yes | 60  | 7 Sun drying  | Frequent  |
| Yes | No  | No  | Yes | Yes | 90  | 30 Sun drying | Frequent  |
| Yes | No  | No  | Yes | Yes | 120 | 7 Sun drying  | Frequent  |
| No  | No  | No  | Yes | Yes | 30  | 60 Sun drying | Never     |
| Yes | No  | No  | Yes | Yes | 30  | 30 Sun drying | Never     |
| No  | No  | No  | No  | Yes | 30  | 30 Sun drying | Never     |
| Yes | Yes | No  | No  | Yes | 21  | 3 Sun drying  | Never     |
| Yes | No  | No  | Yes | Yes | 45  | 30 Sun drying | Frequent  |
| No  | No  | No  | No  | No  | 0   | 30 Sun drying | One month |
| No  | No  | No  | No  | No  | 14  | 7 Sun drying  | One week  |
| No  | No  | No  | No  | No  | 7   | 7 Sun drying  | One week  |
| No  | No  | No  | No  | No  | 30  | 7 Sun drying  | Never     |
| No  | No  | No  | No  | No  | 21  | 4 Sun drying  | Never     |
| No  | No  | No  | No  | No  | 7   | 7 Sun drying  | Frequent  |
| No  | No  | No  | No  | No  | 21  | 4 Sun drying  | Frequent  |
| No  | No  | No  | No  | No  | 0   | 7 Sun drying  | Never     |
| No  | No  | No  | No  | No  | 7   | 30 Sun drying | Frequent  |
| No  | No  | No  | No  | No  | 30  | 7 Sun drying  | Never     |
| Yes | No  | No  | Yes | No  | 21  | 3 Sun drying  | Frequent  |
| No  | No  | Yes | No  | Yes | 30  | 7 Sun drying  | Frequent  |
| No  | Yes | No  | No  | No  | 60  | 2 Sun drying  | Frequent  |
| No  | Yes | No  | No  | Yes | 21  | 1 Sun drying  | Frequent  |
| No  | No  | No  | Yes | No  | 14  | 7 Sun drying  | Frequent  |
| Yes | No  | No  | No  | No  | 30  | 30 Sun drying | Frequent  |
| Yes | Yes | No  | No  | Yes | 7   | 21 Sun drying | Never     |
| Yes | Yes | No  | No  | Yes | 30  | 21 Sun drying | Frequent  |
| No  | No  | No  | Yes | Yes | 14  | 0 Sun drying  | Frequent  |
| Yes | No  | No  | Yes | Yes | 30  | 14 Sun drying | Never     |
| Yes | No  | No  | No  | Yes | 7   | 2 Airing      | Frequent  |
| Yes | No  | No  | Yes | Yes | 30  | 3 Sun drying  | Never     |
| Yes | No  | Yes | No  | Yes | 7   | 3 Airing      | Frequent  |
| Yes | No  | No  | No  | No  | 30  | 7 Sun drying  | Frequent  |
| Yes | No  | No  | Yes | Yes | 30  | 7 Sun drying  | Frequent  |
| Yes | No  | No  | Yes | Yes | 21  | 2 Sun drying  | Never     |
| Yes | No  | No  | Yes | Yes | 21  | 3 Sun drying  | Frequent  |
| Yes | No  | No  | Yes | Yes | 30  | 14 Sun drying | Never     |
| Yes | No  | No  | No  | No  | 2   | 2 Sun drying  | Never     |
| Yes | No  | No  | Yes | Yes | 14  | 4 Sun drying  | Never     |

|     |     |     |     |     |     |                        |
|-----|-----|-----|-----|-----|-----|------------------------|
| Yes | No  | No  | Yes | Yes | 30  | 7 Sun drying Never     |
| Yes | No  | No  | Yes | Yes | 30  | 2 Sun drying Never     |
| Yes | No  | No  | Yes | Yes | 60  | 3 Sun drying Frequent  |
| Yes | No  | No  | Yes | Yes | 30  | 7 Sun drying Never     |
| Yes | No  | No  | Yes | Yes | 30  | 7 Sun drying Never     |
| Yes | No  | No  | Yes | Yes | 30  | 7 Sun drying Never     |
| Yes | No  | No  | Yes | Yes | 30  | 7 Sun drying Never     |
| Yes | No  | No  | Yes | Yes | 30  | 2 Sun drying Never     |
| Yes | No  | No  | Yes | Yes | 21  | 4 Sun drying Never     |
| Yes | No  | No  | Yes | Yes | 30  | 2 Sun drying Never     |
| Yes | No  | No  | Yes | Yes | 30  | 3 Sun drying Never     |
| Yes | No  | No  | Yes | Yes | 60  | 4 Sun drying Never     |
| Yes | No  | No  | Yes | Yes | 30  | 7 Sun drying Never     |
| No  | No  | No  | Yes | Yes | 3   | 2 Sun drying Frequent  |
| Yes | No  | Yes | Yes | Yes | 7   | 7 Sun drying Never     |
| Yes | No  | No  | Yes | Yes | 14  | 7 Sun drying Never     |
| No  | Yes | No  | Yes | Yes | 30  | 7 Sun drying Never     |
| No  | Yes | No  | Yes | Yes | 30  | 7 Sun drying Frequent  |
| No  | No  | No  | Yes | Yes | 30  | 7 Sun drying Frequent  |
| No  | No  | No  | Yes | Yes | 60  | 7 Sun drying Frequent  |
| No  | Yes | No  | Yes | Yes | 60  | 7 Sun drying Never     |
| Yes | No  | No  | Yes | Yes | 30  | 30 Sun drying Frequent |
| Yes | No  | No  | Yes | Yes | 14  | 3 Sun drying Always    |
| Yes | No  | No  | Yes | Yes | 30  | 14 Sun drying Never    |
| Yes | No  | No  | Yes | Yes | 7   | 7 Sun drying Frequent  |
| No  | No  | Yes | No  | Yes | 30  | 7 Sun drying Frequent  |
| No  | No  | Yes | No  | Yes | 14  | 7 Sun drying Never     |
| No  | No  | Yes | No  | Yes | 21  | 7 Sun drying Frequent  |
| No  | No  | No  | No  | Yes | 21  | 21 Sun drying Never    |
| No  | No  | No  | No  | No  | 60  | 14 Sun drying Never    |
| No  | Yes | No  | No  | No  | 14  | 7 Sun drying Never     |
| Yes | Yes | No  | No  | No  | 14  | 14 Sun drying Never    |
| No  | No  | No  | No  | No  | 30  | 30 Sun drying Never    |
| No  | Yes | No  | No  | No  | 30  | 7 Sun drying Never     |
| No  | Yes | No  | No  | No  | 120 | 1 Sun drying Frequent  |
| No  | Yes | No  | No  | No  | 90  | 2 Sun drying Never     |
| No  | Yes | No  | No  | No  | 150 | 4 Sun drying Never     |
| No  | Yes | No  | No  | No  | 90  | 2 Sun drying Never     |
| No  | Yes | No  | No  | No  | 120 | 3 Sun drying Never     |
| No  | Yes | No  | No  | No  | 21  | 21 Sun drying Never    |
| No  | Yes | No  | No  | No  | 14  | 7 Airing Never         |
| No  | No  | No  | No  | No  | 21  | 4 Sun drying Never     |
| No  | No  | No  | Yes | No  | 30  | 7 Sun drying Never     |
| Yes | No  | No  | Yes | Yes | 60  | 14 Sun drying Frequent |
| Yes | No  | No  | Yes | Yes | 30  | 14 Sun drying Frequent |
| Yes | Yes | No  | No  | Yes | 30  | 21 Sun drying Never    |
| No  | No  | No  | Yes | Yes | 60  | 1 Sun drying Always    |

|     |     |     |     |     |     |                         |
|-----|-----|-----|-----|-----|-----|-------------------------|
| Yes | Yes | No  | Yes | Yes | 30  | 21 Sun drying Frequent  |
| No  | Yes | Yes | No  | No  | 14  | 21 Sun drying Never     |
| No  | Yes | No  | No  | No  | 18  | 4 Sun drying Never      |
| No  | Yes | No  | No  | No  | 120 | 3 Sun drying Never      |
| No  | Yes | No  | No  | No  | 30  | 2 Sun drying Never      |
| No  | Yes | No  | No  | No  | 120 | 2 Sun drying Never      |
| No  | No  | No  | No  | No  | 30  | 3 Sun drying One month  |
| No  | No  | No  | No  | No  | 4   | 3 Sun drying Never      |
| No  | Yes | No  | No  | No  | 18  | 14 Sun drying Never     |
| No  | Yes | No  | No  | No  | 90  | 2 Sun drying Never      |
| No  | Yes | No  | Yes | Yes | 90  | 2 Sun drying Never      |
| No  | Yes | No  | No  | No  | 7   | 1 Airing Never          |
| No  | No  | No  | No  | No  | 30  | 6 Sun drying Never      |
| No  | Yes | No  | No  | No  | 120 | 2 Sun drying Never      |
| No  | No  | No  | No  | No  | 90  | 3 Sun drying Never      |
| No  | No  | No  | No  | No  | 30  | 3 Sun drying One month  |
| Yes | No  | No  | Yes | Yes | 3   | 5 Sun drying Never      |
| Yes | No  | No  | Yes | Yes | 30  | 4 Sun drying Frequent   |
| Yes | No  | No  | Yes | Yes | 30  | 21 Sun drying Frequent  |
| Yes | No  | No  | No  | No  | 14  | 7 Sun drying Frequent   |
| Yes | Yes | No  | Yes | Yes | 60  | 30 Sun drying Frequent  |
| No  | No  | No  | Yes | Yes | 60  | 1 Sun drying Frequent   |
| Yes | Yes | No  | No  | No  | 14  | 5 Sun drying Never      |
| No  | No  | No  | Yes | Yes | 90  | 2 Sun drying Always     |
| No  | Yes | No  | Yes | No  | 120 | 7 Sun drying Never      |
| Yes | No  | No  | No  | No  | 30  | 7 Sun drying One month  |
| No  | No  | No  | No  | No  | 60  | 14 Sun drying One month |
| No  | Yes | No  | No  | No  | 60  | 30 Sun drying Never     |
| No  | Yes | No  | No  | No  | 30  | 30 Sun drying Never     |
| No  | Yes | No  | No  | No  | 30  | 14 Sun drying Never     |
| No  | Yes | No  | No  | No  | 30  | 7 Sun drying Never      |
| No  | Yes | No  | No  | No  | 60  | 30 Sun drying Never     |
| No  | Yes | No  | No  | No  | 60  | 30 Sun drying Never     |
| No  | No  | Yes | No  | Yes | 14  | 7 Sun drying Frequent   |
| No  | Yes | No  | No  | No  | 75  | 14 Sun drying Never     |
| No  | Yes | No  | No  | No  | 120 | 1 Sun drying Always     |
| No  | No  | No  | No  | No  | 14  | 4 Sun drying One month  |
| No  | Yes | No  | No  | No  | 90  | 2 Sun drying Frequent   |
| No  | Yes | No  | No  | No  | 150 | 2 Sun drying Frequent   |
| No  | Yes | No  | Yes | Yes | 30  | 2 Sun drying Always     |
| Yes | Yes | No  | Yes | Yes | 60  | 7 Sun drying Frequent   |
| No  | Yes | No  | No  | No  | 14  | 14 Sun drying Never     |
| No  | Yes | No  | No  | No  | 7   | 7 Sun drying Never      |
| No  | No  | No  | No  | No  | 45  | 4 Sun drying Never      |
| No  | Yes | No  | No  | No  | 90  | 4 Sun drying Never      |
| No  | No  | No  | Yes | Yes | 60  | 3 Sun drying Always     |
| No  | Yes | No  | No  | No  | 30  | 2 Sun drying Never      |



|     |     |     |     |     |     |               |           |
|-----|-----|-----|-----|-----|-----|---------------|-----------|
| No  | Yes | No  | No  | No  | 60  | 3 Sun drying  | Never     |
| No  | No  | No  | No  | No  | 14  | 7 Sun drying  | Never     |
| No  | No  | No  | No  | No  | 30  | 30 Sun drying | One week  |
| Yes | Yes | No  | Yes | Yes | 90  | 30 Sun drying | Never     |
| Yes | Yes | No  | No  | No  | 7   | 14 Sun drying | Never     |
| No  | Yes | No  | No  | No  | 90  | 2 Sun drying  | Never     |
| No  | No  | No  | No  | No  | 30  | 30 Sun drying | Never     |
| Yes | Yes | No  | Yes | Yes | 44  | 14 Sun drying | Always    |
| No  | Yes | No  | No  | No  | 14  | 7 Sun drying  | Never     |
| No  | No  | No  | No  | No  | 14  | 5 Sun drying  | One month |
| No  | No  | No  | No  | No  | 14  | 5 Sun drying  | One month |
| No  | Yes | No  | Yes | Yes | 120 | 3 Sun drying  | Always    |
| No  | Yes | No  | No  | No  | 30  | 30 Sun drying | Never     |
| No  | Yes | No  | No  | No  | 90  | 2 Sun drying  | Never     |
| No  | No  | No  | Yes | No  | 90  | 7 Sun drying  | One week  |
| Yes | Yes | No  | Yes | Yes | 30  | 7 Sun drying  | Never     |
| No  | Yes | No  | No  | No  | 1   | 21 Sun drying | Never     |
| Yes | No  | No  | No  | No  | 30  | 7 Airing      | Frequent  |
| Yes | No  | No  | Yes | Yes | 30  | 7 Sun drying  | Never     |
| Yes | No  | No  | Yes | Yes | 60  | 3 Sun drying  | Never     |
| No  | No  | No  | Yes | Yes | 30  | 7 Sun drying  | Frequent  |
| No  | Yes | Yes | No  | No  | 90  | 4 Sun drying  | Never     |
| No  | No  | No  | Yes | Yes | 60  | 1 Sun drying  | Frequent  |
| No  | Yes | No  | No  | No  | 150 | 2 Sun drying  | Never     |
| Yes | Yes | No  | No  | No  | 90  | 7 Sun drying  | Never     |
| Yes | Yes | No  | No  | No  | 14  | 7 Sun drying  | Never     |
| Yes | Yes | Yes | No  | No  | 14  | 7 Sun drying  | Never     |
| Yes | Yes | No  | No  | No  | 21  | 14 Sun drying | Never     |
| No  | No  | No  | No  | No  | 30  | 3 Airing      | Never     |
| No  | No  | No  | No  | No  | 150 | 14 Sun drying | Never     |
| No  | No  | No  | No  | No  | 60  | 7 Sun drying  | Never     |
| Yes | No  | No  | Yes | Yes | 7   | 7 Sun drying  | Frequent  |
| Yes | No  | No  | Yes | Yes | 2   | 2 Sun drying  | Never     |

| husk_stora | grain_stora | know_grair  | dry_last_se | why_not_d | clean_stora | sale_maize | bags_maize | quality_sto |
|------------|-------------|-------------|-------------|-----------|-------------|------------|------------|-------------|
| Never      | Frequent    | Hard when   | 1           | Yes       | No          |            |            |             |
| Frequent   | Always      | During shel | 1           | Yes       | No          |            |            |             |
| Frequent   | Never       | Observe ch  | 0           | Consumed  | Yes         | No         |            | 0           |
| Never      | Always      | Touching tl | 1           | Yes       | No          |            |            | 0           |
| Never      | Always      | Hard when   | 1           | Yes       | No          |            |            | 0           |
| Never      | Always      | Hard when   | 1           | Yes       | No          |            |            | 0           |
| Never      | Always      | Hard when   | 1           | Yes       | No          |            |            | 0           |
| Never      | Always      | Touching tl | 1           | Yes       | No          |            |            | 0           |
| Never      | Always      | Touching tl | 1           | Yes       | No          |            |            | 0           |
| Never      | Always      | Touching tl | 1           | Yes       | No          |            |            | 0           |
| Never      | Always      | Touching tl | 1           | Yes       | No          |            |            | 0           |
| Never      | Always      | Hard when   | 1           | Yes       | No          |            |            | 0           |
| Never      | Never       | Hard when   | 1           | Yes       | No          |            |            | 0           |
| Never      | Always      | Touching tl | 1           | Yes       | No          |            |            | 0           |
| Never      | Always      | Touching tl | 1           | Yes       | No          |            |            | 0           |
| Never      | Always      | Hard when   | 1           | Yes       | No          |            |            | 0           |
| Never      | Always      | Hard when   | 1           | Yes       | No          |            |            | 0           |
| Never      | Always      | Touching tl | 1           | Yes       | No          |            |            | 0           |
| Never      | Always      | Hard when   | 1           | Yes       | No          |            |            | 0           |
| Never      | Always      | Hard when   | 1           | Yes       | No          |            |            | 0           |
| Never      | Always      | Touching tl | 1           | Yes       | No          |            |            | 0           |
| Never      | Always      | Hard when   | 1           | Yes       | No          |            |            | 0           |
| Never      | Always      | After one v | 1           | Yes       | No          |            |            | 0           |
| Never      | Always      | Touching tl | 1           | Yes       | No          |            |            | 0           |
| Never      | Always      | Hard when   | 1           | Yes       | No          |            |            | 0           |
| Never      | Always      | Hard when   | 1           | Yes       | No          |            |            | 0           |
| Never      | Always      | Hard when   | 1           | Yes       | No          |            |            | 0           |
| Never      | Frequent    | Observe ch  | 1           | Yes       | No          |            |            | 0           |
| Never      | Frequent    | Sound reco  | 1           | Yes       | No          |            |            | 0           |
| Never      | Frequent    | Sound reco  | 1           | Yes       | No          |            |            | 0           |
| Never      | Frequent    | Sound reco  | 1           | Yes       | No          |            |            | 0           |
| Never      | Frequent    | Hard when   | 1           | Yes       | No          |            |            | 0           |
| Never      | Always      | Hard when   | 1           | Yes       | No          |            |            | 0           |
| Never      | Always      | Hard when   | 1           | Yes       | No          |            |            | 0           |
| Never      | Always      | Hard when   | 1           | Yes       | No          |            |            | 0           |
| One month  | One Month   | Observe ch  | 1           | Yes       | No          |            |            | 0           |
| One month  | Always      | Hard when   | 1           | Yes       | No          |            |            | 0           |
| Never      | Frequent    | During shel | 1           | Yes       | No          |            |            | 0           |
| Never      | Always      | After one v | 1           | Yes       | No          |            |            | 0           |
| Never      | Always      | Hard when   | 1           | Yes       | No          |            |            | 0           |
| Never      | Always      | Hard when   | 1           | Yes       | No          |            |            | 0           |
| Never      | Always      | Touching tl | 1           | Yes       | No          |            |            | 0           |
| Never      | Always      | Touching tl | 1           | Yes       | No          |            |            | 0           |
| Never      | Always      | Touching tl | 1           | Yes       | No          |            |            | 0           |
| Never      | Always      | Touching tl | 1           | Yes       | No          |            |            | 0           |
| Never      | Always      | Touching tl | 1           | Yes       | No          |            |            | 0           |
| Never      | Never       | After one v | 1           | Yes       | No          |            |            | 0           |
| Never      | Always      | After one v | 1           | Yes       | No          |            |            | 0           |

|           |           |              |              |     |    |        |
|-----------|-----------|--------------|--------------|-----|----|--------|
| Never     | Always    | Touching tl  | 1            | Yes | No | 0      |
| Never     | Always    | Hard when    | 1            | Yes | No | 0      |
| Never     | Always    | Hard when    | 1            | Yes | No | 0      |
| Always    | Always    | Touching tl  | 1            | Yes | No | 0      |
| Never     | Always    | Hard when    | 1            | Yes | No | 0      |
| Never     | Always    | Hard when    | 1            | Yes | No | 0      |
| Never     | Always    | Touching tl  | 1            | Yes | No | 0      |
| Never     | Always    | Touching tl  | 1            | Yes | No | 0      |
| Never     | Always    | Observe ch   | 1            | Yes | No | 0      |
| Never     | Always    | Sound reco   | 1 N/A        | Yes | No | 0      |
| Never     | Frequent  | During mill  | 1            | Yes | No | 0      |
| Never     | Frequent  | Sound reco   | 1            | Yes | No | 0 Good |
| Never     | Frequent  | Sound reco   | 1            | Yes | No | 0      |
| Never     | Frequent  | Sound reco   | 1            | Yes | No | 0      |
| Never     | Frequent  | Sound reco   | 1            | Yes | No | 0      |
| Never     | Frequent  | Hard when    | 1            | Yes | No | 0      |
| Never     | Always    | Hard when    | 1            | Yes | No | 0      |
| Never     | Always    | Hard when    | 1            | Yes | No | 0      |
| Never     | Always    | Hard when    | 1            | Yes | No | 0      |
| Never     | Always    | Hard when    | 1            | Yes | No | 0      |
| One month | Always    | Hard when    | 1            | Yes | No | 0      |
| Never     | Always    | Hard when    | 1            | Yes | No | 0 Good |
| Never     | Always    | Hard when    | 1            | Yes | No | 0      |
| One week  | Always    | Hard when    | 1            | Yes | No | 0      |
| Never     | Always    | Hard when    | 1            | Yes | No | 0      |
| One month | Always    | Sound reco   | 1            | Yes | No | 0      |
| One week  | One Month | Hard when    | 1            | Yes | No | 0      |
| One week  | Always    | Hard when    | 1            | Yes | No | 0      |
| One month | Always    | Sound reco   | 1            | Yes | No | 0      |
| Never     | Frequent  | Hard when    | 1            | Yes | No | 0      |
| Never     | Frequent  | Hard when    | 1            | Yes | No | 0      |
| Never     | Frequent  | Hard when    | 1            | Yes | No | 0      |
| Never     | Frequent  | Sound reco   | 1            | Yes | No | 0      |
| Frequent  | Frequent  | Hard when    | 1            | Yes | No | 0      |
| Never     | Frequent  | Hard when    | 1            | Yes | No | 0      |
| Never     | Frequent  | Sound reco   | 1            | Yes | No | 0      |
| Never     | Frequent  | During shel  | 1            | Yes | No | 0      |
| Never     | Frequent  | During mill  | 1            | Yes | No | 0      |
| Never     | Always    | Touching tl  | 1            | No  | No | 0      |
| One month | Always    | Hard when    | 0 Poor sun h | Yes | No | 0      |
| One month | Always    | Touching tl  | 0 Short time | Yes | No | 0      |
| One month | Always    | Self shellin | 0 Poor sun h | Yes | No | 0      |
| Never     | Frequent  | Sound reco   | 1            | Yes | No | 0      |
| Never     | Frequent  | Hard when    | 1            | Yes | No | 0      |
| Never     | Frequent  | Hard when    | 1            | Yes | No | 0      |
| Never     | Frequent  | Sound reco   | 1            | Yes | No | 0      |
| Never     | Frequent  | Sound reco   | 1            | Yes | No | 0      |



|           |          |              |   |     |    |   |
|-----------|----------|--------------|---|-----|----|---|
| Never     | Frequent | Sound reco   | 1 | Yes | No | 0 |
| Never     | Frequent | Hard when    | 1 | Yes | No | 0 |
| Never     | Always   | Sound reco   | 1 | Yes | No | 0 |
| Never     | Always   | Hard when    | 1 | Yes | No | 0 |
| Never     | Always   | Sound reco   | 1 | Yes | No | 0 |
| Never     | Always   | Sound reco   | 1 | Yes | No | 0 |
| Never     | Frequent | Sound reco   | 1 | Yes | No | 0 |
| Never     | Frequent | Sound reco   | 1 | Yes | No | 0 |
| Never     | Frequent | Hard when    | 1 | Yes | No | 0 |
| Never     | Frequent | Sound reco   | 1 | Yes | No | 0 |
| Never     | Frequent | Sound reco   | 1 | Yes | No | 0 |
| Never     | Frequent | Hard when    | 1 | Yes | No | 0 |
| Never     | Frequent | Sound reco   | 1 | Yes | No | 0 |
| Never     | Frequent | Sound reco   | 1 | Yes | No | 0 |
| Never     | Always   | Hard when    | 1 | Yes | No | 0 |
| Never     | Frequent | After sun d  | 1 | Yes | No | 0 |
| Never     | Frequent | Hard when    | 1 | Yes | No | 0 |
| One month | Always   | Self shellin | 1 | No  | No | 0 |
| One month | Always   | Self shellin | 1 | Yes | No | 0 |
| One week  | One week | Hard when    | 1 | Yes | No | 0 |
| One month | Always   | Sound reco   | 1 | Yes | No | 0 |
| Never     | Always   | Hard when    | 1 | Yes | No | 0 |
| Never     | Always   | Hard when    | 1 | Yes | No | 0 |
| Never     | Always   | Hard when    | 1 | Yes | No | 0 |
| One month | Always   | Hard when    | 1 | Yes | No | 0 |
| One month | Always   | Hard when    | 1 | Yes | No | 0 |
| Never     | Always   | Hard when    | 1 | Yes | No | 0 |
| Frequent  | Frequent | Touching tl  | 1 | Yes | No | 0 |
| Frequent  | Frequent | Touching tl  | 1 | Yes | No | 0 |
| Frequent  | Frequent | Touching tl  | 1 | No  | No | 0 |
| Frequent  | Frequent | Sound reco   | 1 | Yes | No | 0 |
| Frequent  | Frequent | Touching tl  | 1 | Yes | No | 0 |
| Frequent  | Frequent | Sound reco   | 1 | No  | No | 0 |
| Never     | Always   | Touching tl  | 1 | Yes | No | 0 |
| Never     | Always   | Hard when    | 1 | Yes | No | 0 |
| Never     | Frequent | Observe ch   | 1 | Yes | No | 0 |
| Never     | Frequent | Self shellin | 1 | Yes | No | 0 |
| Never     | Always   | Sound reco   | 1 | Yes | No | 0 |
| Never     | Always   | Sound reco   | 1 | Yes | No | 0 |
| Never     | Always   | Sound reco   | 1 | Yes | No | 0 |
| Never     | Always   | Observe ch   | 1 | Yes | No | 0 |
| Never     | Frequent | Observe ch   | 1 | Yes | No | 0 |
| Never     | Frequent | Sound reco   | 1 | Yes | No | 0 |
| Never     | Frequent | Touching tl  | 1 | Yes | No | 0 |
| Never     | Frequent | Sound reco   | 1 | Yes | No | 0 |
| Never     | Always   | Sound reco   | 1 | Yes | No | 0 |
| Never     | Frequent | Sound reco   | 1 | Yes | No | 0 |

|          |          |               |       |     |     |            |
|----------|----------|---------------|-------|-----|-----|------------|
| Never    | Frequent | Sound reco    | 1     | Yes | No  | 0          |
| Never    | Frequent | Sound reco    | 1     | Yes | No  | 0          |
| Never    | Frequent | Sound reco    | 1     | Yes | No  | 0          |
| Never    | Frequent | Sound and     | 1     | Yes | No  | 0          |
| Never    | Frequent | Salting grai  | 1     | Yes | No  | 0          |
| Never    | Frequent | Sound reco    | 1     | Yes | No  | 0          |
| Never    | Frequent | Hard when     | 1     | Yes | No  | 0          |
| Never    | Frequent | Sound reco    | 1     | Yes | No  | 0          |
| Never    | Frequent | Sound reco    | 1     | Yes | No  | 0          |
| Never    | Frequent | Sound reco    | 1     | Yes | No  | 0          |
| Never    | Frequent | Self shellinç | 1     | Yes | No  | 0          |
| Never    | Frequent | Hard when     | 1     | Yes | No  | 0          |
| Never    | Frequent | Sound reco    | 1     | Yes | No  | 0          |
| Never    | Frequent | Sound reco    | 1     | Yes | No  | 0          |
| Never    | Always   | Sound reco    | 1     | Yes | No  | 0          |
| Never    | Always   | During shel   | 1     | Yes | No  | 0          |
| Never    | Frequent | Hard when     | 1     | Yes | No  | 0          |
| Never    | Always   | Sound reco    | 1     | Yes | No  | 0          |
| Never    | Always   | Hard when     | 1     | Yes | No  | 0          |
| Never    | Always   | Hard when     | 1     | Yes | No  | 0          |
| Never    | Always   | Hard when     | 1     | Yes | No  | 0          |
| Never    | Always   | Self shellinç | 1     | Yes | No  | 0          |
| Never    | Always   | Touching tñ   | 1     | Yes | No  | 0          |
| Never    | Always   | After sun d   | 1     | Yes | No  | 0          |
| Never    | Always   | During shel   | 1     | Yes | No  | 0          |
| Never    | Always   | Self shellinç | 1     | Yes | No  | 0          |
| Never    | Always   | Sound reco    | 1     | Yes | No  | 0          |
| Never    | Always   | Sound reco    | 1     | Yes | No  | 0          |
| Never    | Always   | Sound reco    | 1     | Yes | Yes | 1260 Good  |
| Never    | Always   | Touching tñ   | 1 N/A | Yes | Yes | 12600 Good |
| Never    | Always   | Hard when     | 1 N/A | Yes | Yes | 1350 Good  |
| Never    | Always   | Hard when     | 1 N/A | Yes | Yes | 1350 Good  |
| Never    | Always   | Touching tñ   | 1 N/A | Yes | Yes | 1350 Good  |
| Never    | Always   | Touching tñ   | 1 N/A | Yes | Yes | 1350 Good  |
| Never    | Never    | Sound reco    | 1     | Yes | Yes | 1350 Good  |
| Never    | Frequent | Sound reco    | 1     | Yes | Yes | 1350 Good  |
| Never    | Frequent | Sound reco    | 1     | Yes | Yes | 1350 Good  |
| Never    | Frequent | Sound reco    | 1     | Yes | Yes | 1350 Good  |
| Never    | Frequent | Sound reco    | 1     | Yes | Yes | 1350 Good  |
| Never    | Frequent | Hard when     | 1     | Yes | Yes | 1350 Good  |
| Never    | Always   | Hard when     | 1     | Yes | Yes | 180 Good   |
| Never    | Always   | Hard when     | 1 N/A | Yes | Yes | 180 Good   |
| Never    | Always   | Hard when     | 1     | Yes | Yes | 180 Good   |
| Never    | Frequent | Hard when     | 1     | Yes | Yes | 180 Good   |
| Frequent | Frequent | Hard when     | 1     | Yes | Yes | 180        |
| Never    | Always   | Self shellinç | 1     | Yes | Yes | 180 Good   |
| Never    | Frequent | Hard when     | 1     | Yes | Yes | 1800 Good  |

|           |          |             |       |            |     |      |      |      |
|-----------|----------|-------------|-------|------------|-----|------|------|------|
| Frequent  | Frequent | Hard when   | 1     | Yes        | Yes | 1800 | Good |      |
| Never     | Always   | Touching tl | 1 N/A | Yes        | Yes | 1800 | Good |      |
| Never     | Always   | Hard when   | 1 N/A | Yes        | Yes | 1800 | Good |      |
| Never     | Frequent | Sound reco  | 1     | Yes        | Yes | 1800 | Good |      |
| Never     | Frequent | Sound reco  | 1     | Yes        | Yes | 1800 | Good |      |
| Never     | Frequent | Sound reco  | 1     | Yes        | Yes | 1800 |      |      |
| One week  | Always   | Sound reco  | 1     | Yes        | Yes | 1800 | Fair |      |
| Never     | Always   | Hard when   | 1     | Yes        | Yes | 1980 | Good |      |
| Never     | Always   | Hard when   | 0     | Poor sun h | Yes | Yes  | 2250 | Good |
| Never     | Frequent | Sound reco  | 1     | Yes        | Yes | 2250 | Good |      |
| Always    | Frequent | Sound reco  | 1     | Yes        | Yes | 270  | Good |      |
| Never     | Always   | Touching tl | 1     | Yes        | Yes | 270  | Good |      |
| Never     | Always   | Hard when   | 1 N/A | Yes        | Yes | 270  | Good |      |
| Never     | Frequent | Sound reco  | 1     | Yes        | Yes | 270  | Good |      |
| Never     | Always   | Hard when   | 1     | Yes        | Yes | 270  | Good |      |
| One month | Always   | Hard when   | 1     | Yes        | Yes | 270  | Good |      |
| Never     | Frequent | Sound reco  | 1     | Yes        | Yes | 270  | Good |      |
| Never     | Frequent | Hard when   | 1     | Yes        | Yes | 270  | Good |      |
| Never     | Frequent | Hard when   | 1     | Yes        | Yes | 270  | Good |      |
| Never     | Always   | Sound reco  | 1     | Yes        | Yes | 270  | Good |      |
| Frequent  | Frequent | Hard when   | 1     | Yes        | Yes | 2700 | Good |      |
| Never     | Frequent | Sound reco  | 1     | Yes        | Yes | 2700 | Good |      |
| Never     | Always   | Touching tl | 1 N/A | Yes        | Yes | 2700 | Good |      |
| Never     | Frequent | Observe ch  | 1     | Yes        | Yes | 2700 | Good |      |
| Never     | Always   | Hard when   | 1 N/A | Yes        | Yes | 2700 | Good |      |
| One week  | Always   | Hard when   | 1     | Yes        | Yes | 2700 | Good |      |
| One month | Always   | Sound reco  | 1     | Yes        | Yes | 3060 | Poor |      |
| Never     | Frequent | Hard when   | 1     | Yes        | Yes | 3060 | Good |      |
| Never     | Always   | During shel | 1     | Yes        | Yes | 34   | Good |      |
| Never     | Always   | Touching tl | 1     | Yes        | Yes | 360  | Good |      |
| Never     | Always   | Touching tl | 1     | Yes        | Yes | 360  | Good |      |
| Never     | Frequent | Hard when   | 1     | Yes        | Yes | 360  | Good |      |
| Never     | Frequent | Sound reco  | 1     | Yes        | Yes | 360  | Good |      |
| Never     | Always   | Sound reco  | 1     | Yes        | Yes | 360  |      |      |
| Never     | Always   | Touching tl | 1 N/A | Yes        | Yes | 3600 | Good |      |
| Never     | Never    | Sound reco  | 1     | Yes        | Yes | 3600 | Good |      |
| One week  | Always   | Hard when   | 1     | Yes        | Yes | 3600 | Good |      |
| Never     | Never    | Sound reco  | 1     | Yes        | Yes | 450  | Good |      |
| Never     | Never    | Sound reco  | 1     | Yes        | Yes | 450  | Good |      |
| Never     | Frequent | Observe ch  | 1     | Yes        | Yes | 450  | Good |      |
| Frequent  | Frequent | Hard when   | 1     | Yes        | Yes | 450  | Good |      |
| Never     | Always   | Hard when   | 1 N/A | Yes        | Yes | 450  | Good |      |
| Never     | Always   | Touching tl | 1 N/A | Yes        | Yes | 450  | Good |      |
| Never     | Always   | Touching tl | 1 N/A | Yes        | Yes | 450  | Good |      |
| Never     | Frequent | Sound reco  | 1     | Yes        | Yes | 450  | Good |      |
| Never     | Frequent | Hard when   | 1     | Yes        | Yes | 450  | Good |      |
| Never     | Frequent | Sound reco  | 1     | Yes        | Yes | 450  | Good |      |

|          |          |              |              |     |     |     |      |
|----------|----------|--------------|--------------|-----|-----|-----|------|
| Never    | Frequent | Hard when    | 1            | Yes | Yes | 450 | Good |
| Never    | Always   | Hard when    | 1            | Yes | Yes | 450 | Poor |
| One week | Always   | Hard when    | 1            | Yes | Yes | 450 | Good |
| Never    | Always   | Sound reco   | 1            | Yes | Yes | 450 | Good |
| Never    | Always   | Hard when    | 1 N/A        | Yes | Yes | 540 | Good |
| Never    | Frequent | Sound reco   | 1            | Yes | Yes | 540 | Good |
| Never    | Always   | Hard when    | 1            | Yes | Yes | 6   | Good |
| Always   | Always   | Hard when    | 1            | Yes | Yes | 630 | Good |
| Never    | Always   | Hard when    | 1 N/A        | Yes | Yes | 630 | Good |
| Always   | Always   | Hard when    | 1            | Yes | Yes | 630 | Good |
| Always   | Always   | Hard when    | 1            | Yes | Yes | 630 | Good |
| Never    | Frequent | Sound reco   | 1            | Yes | Yes | 720 | Good |
| Never    | Frequent | Sound reco   | 1            | Yes | Yes | 720 | Good |
| Never    | Frequent | Sound reco   | 0 Seeds was  | Yes | Yes | 90  | Good |
| One week | Always   | Hard when    | 1            | Yes | Yes | 90  | Poor |
| Never    | Always   | Touching tl  | 1            | Yes | Yes | 90  | Good |
| Never    | Frequent | Sound reco   | 1            | Yes | Yes | 90  | Good |
| Never    | Always   | Observe ch   | 1            | Yes | Yes | 90  |      |
| Never    | Frequent | Sound reco   | 1            | Yes | Yes | 90  |      |
| Never    | Frequent | Self shellin | 1            | Yes | Yes | 90  | Good |
| Never    | Always   | Hard when    | 1            | Yes | Yes | 90  | Good |
| Never    | Frequent | Observe ch   | 0 Poor sprea | Yes | Yes | 900 | Good |
| Never    | Frequent | Observe ch   | 1            | Yes | Yes | 900 | Good |
| Never    | Frequent | Hard when    | 1            | Yes | Yes | 900 | Good |
| Never    | Always   | Observe ch   | 1 N/A        | Yes | Yes | 900 | Good |
| Frequent | Frequent | Touching tl  | 1 N/A        | Yes | Yes | 900 | Good |
| Frequent | Always   | Hard when    | 1 N/A        | Yes | Yes | 900 | Good |
| Frequent | Frequent | Touching tl  | 1 N/A        | Yes | Yes | 900 | Good |
| Never    | Always   | Touching tl  | 1 N/A        | Yes | Yes | 900 | Good |
| Never    | Always   | Hard when    | 1            | Yes | Yes | 900 | Good |
| Never    | Always   | Hard when    | 1            | Yes | Yes | 900 | Good |
| Frequent | Frequent | Hard when    | 1            | Yes | Yes | 900 | Good |
| Frequent | Frequent | Observe ch   | 1            | Yes | Yes | 900 | Good |



| avarage_pr | buyer_large | much_disc | poor_soil | wet_weath | wetness_pi | dampness | earlier_har | pests_stora |
|------------|-------------|-----------|-----------|-----------|------------|----------|-------------|-------------|
|            |             | Yes       | Yes       | Yes       | Yes        | Yes      | Yes         | Yes         |
|            |             | Yes       | Yes       | Yes       | Yes        | Yes      | Yes         | Yes         |
|            |             | No        | Yes       | No        | Yes        | No       | No          | No          |
|            |             | No        | Yes       | Yes       | Yes        | Yes      | Yes         | No          |
|            |             | No        | Yes       | No        | Yes        | Yes      | Yes         | Yes         |
|            |             | No        | Yes       | Yes       | Yes        | Yes      | No          | No          |
|            |             | Yes       | Yes       | Yes       | Yes        | Yes      | Yes         | Yes         |
|            |             | Yes       | Yes       | Yes       | Yes        | Yes      | Yes         | Yes         |
|            |             | Yes       | Yes       | Yes       | Yes        | Yes      | Yes         | Yes         |
|            |             | No        | Yes       | Yes       | Yes        | Yes      | Yes         | No          |
|            |             | Yes       | Yes       | Yes       | Yes        | Yes      | Yes         | Yes         |
|            |             | No        | Yes       | Yes       | Yes        | Yes      | Yes         | Yes         |
|            |             | No        | Yes       | Yes       | Yes        | Yes      | No          | No          |
|            |             | No        | Yes       | Yes       | Yes        | Yes      | No          | Yes         |
|            |             | No        | Yes       | No        | Yes        | Yes      | Yes         | Yes         |
|            |             | No        | Yes       | Yes       | No         | No       | No          | Yes         |
|            |             | No        | Yes       | Yes       | Yes        | Yes      | Yes         | Yes         |
|            |             | Yes       | Yes       | Yes       | Yes        | Yes      | No          | Yes         |
|            |             | No        | Yes       | Yes       | Yes        | Yes      | Yes         | Yes         |
|            |             | No        | Yes       | Yes       | Yes        | Yes      | Yes         | Yes         |
|            |             | No        | Yes       | Yes       | Yes        | Yes      | Yes         | Yes         |
|            |             | Yes       | Yes       | Yes       | Yes        | Yes      | Yes         | Yes         |
|            |             | No        | Yes       | Yes       | Yes        | Yes      | Yes         | Yes         |
|            |             | No        | Yes       | Yes       | Yes        | Yes      | Yes         | Yes         |
|            |             | Yes       | Yes       | Yes       | Yes        | Yes      | Yes         | Yes         |
|            |             | Yes       | Yes       | Yes       | Yes        | Yes      | Yes         | Yes         |
|            |             | No        | Yes       | Yes       | Yes        | Yes      | Yes         | No          |
|            |             | No        | Yes       | Yes       | Yes        | Yes      | Yes         | Yes         |
|            |             | No        | Yes       | Yes       | Yes        | Yes      | Yes         | Yes         |
|            |             | Yes       | Yes       | Yes       | Yes        | Yes      | Yes         | Yes         |
|            |             | Yes       | Yes       | Yes       | Yes        | Yes      | Yes         | Yes         |
|            |             | Yes       | Yes       | No        | Yes        | No       | No          | No          |
|            |             | Yes       | Yes       | Yes       | Yes        | Yes      | Yes         | Yes         |
|            |             | Yes       | Yes       | Yes       | Yes        | Yes      | Yes         | Yes         |
|            |             | Yes       | Yes       | Yes       | Yes        | Yes      | Yes         | Yes         |
|            |             | No        | Yes       | Yes       | Yes        | Yes      | Yes         | Yes         |
|            |             | Yes       | Yes       | Yes       | Yes        | Yes      | Yes         | Yes         |
|            |             | Yes       | Yes       | Yes       | Yes        | Yes      | Yes         | Yes         |
|            |             | Yes       | Yes       | Yes       | Yes        | Yes      | Yes         | Yes         |
|            |             | Yes       | Yes       | Yes       | Yes        | No       | No          | Yes         |

N/A







|                      |    |     |     |     |     |     |     |
|----------------------|----|-----|-----|-----|-----|-----|-----|
|                      |    | Yes | Yes | Yes | Yes | No  | No  |
|                      |    | Yes | Yes | Yes | Yes | Yes | Yes |
|                      |    | No  | No  | No  | Yes | Yes | Yes |
|                      |    | No  | Yes | Yes | Yes | Yes | No  |
|                      |    | Yes | Yes | Yes | Yes | Yes | No  |
|                      |    | Yes | Yes | Yes | Yes | Yes | No  |
|                      |    | Yes | Yes | Yes | Yes | Yes | No  |
|                      |    | Yes | Yes | No  | No  | No  | No  |
|                      |    | Yes | Yes | Yes | Yes | Yes | Yes |
|                      |    | Yes | Yes | Yes | Yes | Yes | No  |
|                      |    | Yes | Yes | Yes | Yes | Yes | No  |
|                      |    | Yes | Yes | No  | No  | No  | No  |
|                      |    | Yes | Yes | Yes | Yes | Yes | No  |
|                      |    | No  | Yes | Yes | Yes | Yes | No  |
|                      |    | No  | No  | No  | Yes | No  | No  |
|                      |    | No  | No  | No  | Yes | Yes | No  |
|                      |    | No  | Yes | Yes | Yes | Yes | Yes |
|                      |    | No  | Yes | Yes | Yes | Yes | No  |
|                      |    | No  | Yes | Yes | Yes | Yes | No  |
|                      |    | No  | Yes | Yes | Yes | Yes | Yes |
|                      |    | Yes | Yes | Yes | Yes | Yes | No  |
|                      |    | No  | No  | Yes | Yes | Yes | Yes |
|                      |    | No  | No  | No  | No  | Yes | No  |
|                      |    | No  | Yes | Yes | Yes | Yes | Yes |
|                      |    | No  | No  | Yes | Yes | Yes | Yes |
|                      |    | Yes | Yes | Yes | Yes | Yes | No  |
|                      |    | No  | Yes | Yes | Yes | No  | No  |
|                      |    | No  | Yes | Yes | Yes | No  | No  |
| 4500 Business man    |    | No  | Yes | Yes | Yes | Yes | No  |
| 3000 Business m      | 45 | No  | Yes | Yes | Yes | Yes | Yes |
| 2000 Local Consumers |    | No  | No  | No  | No  | No  | No  |
| 1400 Cereal          |    | No  | No  | Yes | Yes | Yes | Yes |
| 2300 Cereal          |    | No  | Yes | Yes | Yes | Yes | Yes |
| 2000 Cereal          |    | No  | Yes | Yes | Yes | Yes | Yes |
| 3000 Business man    |    | No  | Yes | Yes | Yes | Yes | No  |
| 2500 Business man    |    | Yes | Yes | Yes | Yes | No  | No  |
| 2500 Business man    |    | No  | Yes | Yes | Yes | Yes | No  |
| 2200 Business man    |    | No  | Yes | Yes | Yes | Yes | No  |
| 2200 Business man    |    | No  | Yes | Yes | Yes | Yes | No  |
| 3800 Business man    |    | No  | Yes | Yes | Yes | Yes | No  |
| 4000 School          |    | Yes | Yes | Yes | Yes | Yes | Yes |
| 2200 Business m      | 2  | Yes | Yes | Yes | Yes | Yes | Yes |
| 4000 Business m      | 23 | No  | Yes | Yes | Yes | Yes | Yes |
| 2300 Business man    |    | No  | Yes | Yes | Yes | Yes | No  |
| 2500 Local Consumers |    | No  | Yes | Yes | Yes | Yes | No  |
| 3600 Business man    |    | Yes | Yes | Yes | Yes | Yes | Yes |
| 2500 Business man    |    | Yes | Yes | Yes | Yes | Yes | Yes |

|                      |     |     |     |     |     |     |     |
|----------------------|-----|-----|-----|-----|-----|-----|-----|
| 2700 Business m      | 2   | No  | Yes | Yes | Yes | No  | No  |
| 2100 Local Consumers |     | No  | No  | Yes | Yes | Yes | Yes |
| 2400 Business m      | 2   | Yes | Yes | Yes | Yes | Yes | Yes |
| 2000 Business man    |     | No  | Yes | Yes | Yes | Yes | No  |
| 2500 Business man    |     | No  | Yes | Yes | Yes | Yes | No  |
| 2000 Business man    |     | No  | Yes | Yes | Yes | Yes | No  |
| 2500 Business man    |     | No  | Yes | Yes | Yes | Yes | Yes |
| 3000 Business m      | 180 | No  | No  | Yes | No  | Yes | No  |
| 1660 Cereal          | 23  | Yes | Yes | Yes | Yes | Yes | Yes |
| 2000 Business man    |     | No  | Yes | Yes | Yes | Yes | No  |
| 2500 Business man    |     | No  | Yes | Yes | No  | No  | No  |
| 4000 School          |     | No  | Yes | Yes | Yes | Yes | Yes |
| 2300 Business man    |     | No  | Yes | Yes | Yes | Yes | Yes |
| 6600 Business man    |     | No  | Yes | Yes | Yes | Yes | No  |
| 1700 Business man    |     | Yes | Yes | Yes | Yes | Yes | Yes |
| 1600 Business man    |     | No  | Yes | Yes | Yes | Yes | No  |
| 2700 Business man    |     | Yes | Yes | Yes | Yes | Yes | No  |
| 3000 Business man    |     | No  | Yes | Yes | Yes | Yes | No  |
| 7500 Business man    |     | Yes | Yes | Yes | Yes | Yes | Yes |
| 6700 Business man    |     | No  | Yes | Yes | Yes | No  | No  |
| 3600 Business m      | 22  | No  | Yes | Yes | Yes | No  | No  |
| 2500 Local Consumers |     | Yes | Yes | Yes | Yes | Yes | Yes |
| 2350 Local Consumers |     | Yes | Yes | Yes | Yes | No  | Yes |
| 2500 Business man    |     | Yes | Yes | Yes | Yes | Yes | Yes |
| 2000 Business man    |     | No  | Yes | Yes | Yes | Yes | Yes |
| 1800 Business man    |     | Yes | Yes | Yes | Yes | Yes | Yes |
| 3000 Business man    |     | No  | Yes | Yes | Yes | Yes | No  |
| 2000 Business m      | 23  | No  | Yes | Yes | Yes | Yes | No  |
| 2000 Business man    |     | Yes | Yes | Yes | Yes | Yes | Yes |
| 4000 School          |     | No  | Yes | Yes | Yes | Yes | Yes |
| 4000 Business man    |     | Yes | Yes | Yes | Yes | Yes | Yes |
| 5000 Business man    |     | No  | Yes | Yes | Yes | Yes | No  |
| 2300 Business man    |     | No  | Yes | Yes | Yes | Yes | No  |
| 3500 Business man    |     | No  | Yes | Yes | Yes | No  | No  |
| 5000 Local Consi     | 23  | No  | Yes | Yes | Yes | Yes | Yes |
| 2500 Business man    |     | No  | Yes | Yes | Yes | Yes | No  |
| 2000 Business man    |     | No  | Yes | Yes | Yes | Yes | No  |
| 2500 Business man    |     | Yes | Yes | Yes | Yes | No  | No  |
| 2500 Business man    |     | No  | No  | No  | Yes | No  | No  |
| 3000 Business man    |     | No  | No  | Yes | Yes | Yes | Yes |
| 2700 Business man    |     | No  | Yes | Yes | Yes | No  | No  |
| 2100 Local Consumers |     | Yes | Yes | Yes | Yes | Yes | Yes |
| 2100 Cereal          |     | No  | Yes | Yes | Yes | Yes | Yes |
| 2200 Business man    |     | No  | Yes | Yes | Yes | Yes | Yes |
| 2000 Business man    |     | Yes | Yes | No  | Yes | Yes | Yes |
| 2500 Business man    |     | No  | No  | No  | No  | No  | Yes |
| 2000 Business man    |     | No  | Yes | Yes | Yes | Yes | No  |

|                      |         |     |     |     |     |     |
|----------------------|---------|-----|-----|-----|-----|-----|
| 2500 Business man    | No      | Yes | Yes | Yes | Yes | Yes |
| 2500 Cereal          | Yes     | Yes | Yes | Yes | Yes | Yes |
| 2500 Local Consi     | 2 No    | Yes | Yes | Yes | Yes | Yes |
| 3000 Business man    | Yes     | Yes | Yes | Yes | Yes | Yes |
| 2000 Local Consumers | No      | Yes | Yes | Yes | Yes | Yes |
| 2500 Business man    | No      | Yes | Yes | Yes | Yes | No  |
| 2500 Cereal          | Yes     | Yes | Yes | Yes | Yes | Yes |
| 2500 Business man    | No      | Yes | Yes | Yes | No  | No  |
| 2850 Local Consumers | Yes     | Yes | Yes | Yes | Yes | Yes |
| 2600 Business man    | No      | Yes | Yes | Yes | Yes | Yes |
| 2600 Business man    | No      | Yes | Yes | Yes | Yes | Yes |
| 3000 Business man    | No      | Yes | Yes | Yes | Yes | No  |
| 1000 Business man    | No      | Yes | Yes | Yes | Yes | Yes |
| 2000 Business man    | No      | Yes | Yes | Yes | Yes | No  |
| 2000 Business m      | 12 Yes  | Yes | Yes | Yes | Yes | Yes |
| 2700 Business m      | 23 No   | No  | No  | No  | Yes | No  |
| 4500 Business man    | No      | Yes | Yes | Yes | Yes | No  |
| 2500 Business man    | No      | Yes | Yes | Yes | Yes | Yes |
| 2700 Business man    | Yes     | Yes | Yes | Yes | Yes | No  |
| 2700 Local Consumers | No      | Yes | Yes | Yes | Yes | No  |
| 1000 Local Consumers | Yes     | Yes | Yes | Yes | No  | Yes |
| 2400 Business man    | No      | Yes | Yes | Yes | Yes | No  |
| 2500 Business man    | No      | Yes | Yes | Yes | Yes | No  |
| 2200 Business man    | No      | Yes | Yes | Yes | Yes | No  |
| 2100 Local Consumers | No      | No  | Yes | Yes | Yes | Yes |
| 2000 Local Consumers | No      | Yes | Yes | Yes | Yes | Yes |
| 2100 Cereal          | No      | No  | Yes | Yes | Yes | Yes |
| 2200 Local Consumers | No      | No  | Yes | Yes | Yes | Yes |
| 2000 Business man    | No      | Yes | Yes | Yes | Yes | Yes |
| 2200 Business m      | 270 Yes | Yes | Yes | Yes | Yes | Yes |
| 2800 Business man    | Yes     | Yes | Yes | Yes | Yes | Yes |
| 2000 Business man    | No      | No  | No  | No  | No  | No  |
| 2300 Business man    | Yes     | Yes | Yes | Yes | Yes | No  |

| drying_long | spreading_completely | plastic_bag | plastic_con | metal_silo | clay_pot | source_far | specify_source           |
|-------------|----------------------|-------------|-------------|------------|----------|------------|--------------------------|
| No          | Yes                  | Yes         | No          | No         | No       | No         | Salaried job             |
| No          | Yes                  | Yes         | No          | No         | No       | No         | Farmer                   |
| No          | Yes                  | Yes         | No          | No         | No       | No         | Farmer                   |
| No          | No                   | Yes         | No          | No         | No       | No         | Farmer                   |
| No          | Yes                  | Yes         | No          | No         | No       | No         | Farmer                   |
| No          | Yes                  | Yes         | Yes         | No         | No       | No         | Merchant                 |
| No          | Yes                  | Yes         | Yes         | No         | No       | No         | Merchant                 |
| No          | Yes                  | Yes         | Yes         | No         | Yes      | No         | Salaried job             |
| No          | Yes                  | Yes         | No          | No         | No       | No         | Merchant                 |
| No          | Yes                  | Yes         | No          | No         | No       | No         | Farmer                   |
| No          | Yes                  | Yes         | Yes         | No         | Yes      | No         | Salaried job             |
| No          | Yes                  | Yes         | No          | No         | No       |            | Farmer                   |
| No          | Yes                  | Yes         | Yes         | No         | No       | No         | Farmer                   |
| No          | Yes                  | Yes         | No          | No         | No       | No         | Merchant                 |
| No          | Yes                  | Yes         | No          | No         | No       | No         | Farmer                   |
| No          | Yes                  | Yes         | No          | No         | No       | No         | Farmer                   |
| No          | Yes                  | Yes         | Yes         | No         | No       | No         | Farmer                   |
| No          | Yes                  | Yes         | No          | No         | No       | No         | Farmer                   |
| No          | Yes                  | Yes         | No          | No         | No       | No         | Farmer                   |
| No          | Yes                  | Yes         | No          | No         | No       | No         | Farmer                   |
| No          | Yes                  | Yes         | No          | No         | No       | No         | Farmer                   |
| No          | Yes                  | Yes         | No          | No         | No       | No         | Farmer                   |
| No          | Yes                  | Yes         | No          | No         | No       | No         | Farmer                   |
| No          | Yes                  | Yes         | Yes         | No         | Yes      | No         | Salaried job             |
| No          | Yes                  | Yes         | No          | No         | No       | No         | Salaried job             |
| No          | Yes                  | Yes         | No          | No         | Yes      | No         | Farmer                   |
| No          | Yes                  | Yes         | No          | No         | Yes      | Yes        | Farmer                   |
| No          | No                   | Yes         | No          | No         | No       | No         | Farmer                   |
| No          | Yes                  | Yes         | No          | No         | No       | No         | Farmer                   |
| No          | No                   | Yes         | No          | No         | No       | No         | Farmer                   |
| Yes         | Yes                  | Yes         | No          | No         | No       | Yes        | Farmer                   |
| Yes         | Yes                  | Yes         | No          | No         | No       | Yes        | Farmer                   |
| No          | No                   | Yes         | No          | No         | No       | No         | Farmer                   |
| No          | Yes                  | Yes         | No          | No         | No       | Yes        | Others      Motorcyclist |
| No          | Yes                  | Yes         | No          | No         | No       | No         | Farmer                   |
| No          | Yes                  | Yes         | No          | No         | No       | No         | Farmer                   |
| No          | Yes                  | Yes         | Yes         | No         | No       | No         | Salaried job             |
| No          | No                   | Yes         | No          | No         | No       | No         | Farmer                   |
| No          | Yes                  | Yes         | Yes         | No         | No       | No         | Merchant                 |
| No          | Yes                  | Yes         | Yes         | No         | No       | No         | Salaried job             |
| No          | Yes                  | Yes         | Yes         | No         | No       | No         | Salaried job             |
| No          | Yes                  | Yes         | No          | No         | No       | No         | Merchant                 |
| No          | Yes                  | Yes         | Yes         | No         | Yes      | No         | Salaried job             |
| No          | Yes                  | Yes         | No          | No         | Yes      | No         | Salaried job             |
| No          | Yes                  | Yes         | No          | No         | Yes      | No         | Salaried job             |



|     |     |     |     |     |     |     |                       |
|-----|-----|-----|-----|-----|-----|-----|-----------------------|
| Yes | Yes | Yes | Yes | No  | No  | No  | Farmer                |
| No  | Yes | Yes | No  | No  | No  | No  | Farmer                |
| Yes | Yes | Yes | Yes | No  | No  | No  | Farmer                |
| No  | Yes | Yes | No  | No  | No  | No  | Salaried job          |
| No  | Yes | Yes | No  | No  | No  | No  | Farmer                |
| No  | Yes | Yes | No  | No  | No  | No  | Salaried job          |
| No  | Yes | Yes | No  | No  | No  | No  | Merchant              |
| No  | Yes | Yes | No  | No  | No  | No  | Farmer                |
| No  | Yes | Yes | No  | No  | Yes | No  | Others                |
| No  | Yes | Yes | Yes | Yes | Yes | Yes | Farmer                |
| No  | Yes | Yes | No  | No  | Yes | Yes | Farmer                |
| No  | No  | Yes | No  | No  | No  | No  | Salaried job          |
| No  | No  | Yes | No  | No  | No  | No  | Farmer                |
| No  | No  | Yes | No  | No  | No  | No  | Farmer                |
| No  | No  | Yes | No  | No  | No  | No  | Merchant              |
| Yes | Yes | No  | No  | No  | No  | No  | Farmer                |
| Yes | Yes | Yes | No  | No  | No  | Yes | Farmer                |
| Yes | Yes | Yes | No  | No  | No  | Yes | Farmer                |
| Yes | Yes | Yes | No  | No  | No  | Yes | Farmer                |
| No  | No  | Yes | No  | No  | No  | Yes | Farmer                |
| Yes | Yes | Yes | No  | No  | No  | Yes | Farmer                |
| Yes | No  | Yes | No  | No  | No  | Yes | Farmer                |
| No  | No  | Yes | No  | No  | No  | No  | Farmer                |
| No  | Yes | Yes | No  | No  | Yes | Yes | Salaried job          |
| No  | Yes | Yes | No  | No  | Yes | No  | Farmer                |
| No  | Yes | Yes | Yes | No  | No  | No  | Salaried job          |
| No  | Yes | Yes | Yes | No  | No  | No  | Farmer                |
| No  | Yes | Yes | No  | No  | Yes | No  | Farmer                |
| No  | Yes | Yes | No  | No  | Yes | Yes | Salaried job          |
| No  | Yes | Yes | No  | No  | Yes | Yes | Farmer                |
| Yes | No  | No  | No  | No  | No  | No  | Farmer                |
| No  | No  | Yes | No  | No  | No  | No  | Others      Dependant |
| No  | Yes | No  | No  | No  | No  | No  | Others                |
| No  | No  | Yes | No  | No  | No  | No  | Salaried job          |
| No  | No  | Yes | No  | No  | No  | No  | Farmer                |
| No  | No  | Yes | No  | No  | No  | No  | Farmer                |
| No  | Yes | Yes | No  | No  | No  | No  | Salaried job          |
| Yes | Yes | Yes | Yes | Yes | Yes | Yes | Farmer                |
| No  | No  | Yes | Yes | Yes | Yes | Yes | Farmer                |
| No  | Yes | Yes | No  | No  | No  | No  | Farmer                |
| No  | Yes | Yes | Yes | Yes | Yes | Yes | Farmer                |
| Yes | Yes | Yes | Yes | No  | No  | Yes | Farmer                |
| No  | No  | Yes | No  | No  | No  | No  | Farmer                |
| No  | No  | Yes | No  | No  | No  | No  | Farmer                |
| No  | No  | Yes | No  | No  | No  | No  | Farmer                |
| No  | No  | No  | No  | No  | No  | No  | Others                |



|     |     |     |     |     |     |     |              |              |
|-----|-----|-----|-----|-----|-----|-----|--------------|--------------|
| No  | Yes | Yes | Yes | No  | Yes | No  | Farmer       |              |
| No  | Yes | Yes | Yes | No  | No  | No  | Farmer       |              |
| No  | Yes | Yes | Yes | Yes | No  | No  | Farmer       |              |
| No  | Yes | Yes | Yes | Yes | No  | No  | Farmer       |              |
| No  | Yes | Yes | Yes | No  | No  | No  | Farmer       |              |
| No  | Yes | Yes | Yes | Yes | No  | No  | Farmer       |              |
| No  | Yes | Yes | Yes | No  | No  | Yes | Farmer       |              |
| No  | Yes | No  | Yes | Yes | Yes | No  | Farmer       |              |
| No  | Yes | Yes | No  | No  | No  | No  | Farmer       |              |
| No  | No  | Yes | Yes | Yes | No  | No  | Farmer       |              |
| No  | Yes | Yes | No  | No  | No  | No  | Salaried job |              |
| No  | No  | No  | No  | No  | No  | No  | Farmer       |              |
| No  | No  | Yes | No  | Yes | No  | No  | Pension      |              |
| No  | No  | Yes | No  | No  | No  | No  | Farmer       |              |
| Yes | Yes | Yes | No  | No  | No  | No  | Farmer       | Salaried job |
| Yes | No  | Yes | No  | No  | No  | No  | Farmer       |              |
| No  | No  | Yes | No  | No  | No  | No  | Farmer       |              |
| No  | Yes | Yes | Yes | Yes | Yes | Yes | Farmer       |              |
| No  | Yes | Yes | No  | No  | Yes | Yes | Farmer       |              |
| No  | No  | Yes | Yes | Yes | Yes | Yes | Farmer       |              |
| Yes | No  | Yes | Yes | Yes | Yes | Yes | Farmer       |              |
| No  | No  | Yes | Yes | Yes | Yes | Yes | Farmer       |              |
| Yes | No  | Yes | Yes | Yes | Yes | Yes | Farmer       |              |
| No  | No  | Yes | Yes | Yes | Yes | Yes | Farmer       |              |
| No  | Yes | Yes | Yes | Yes | No  | Yes | Salaried job |              |
| No  | No  | Yes | Yes | Yes | Yes | Yes | Farmer       |              |
| No  | Yes | Yes | Yes | Yes | Yes | Yes | Farmer       |              |
| No  | Yes | Yes | No  | No  | No  | Yes | Farmer       |              |
| No  | Yes | No  | No  | No  | No  | Yes | Pension      |              |
| No  | No  | Yes | No  | No  | No  | No  | Farmer       |              |
| No  | No  | Yes | No  | No  | No  | Yes | Farmer       |              |
| No  | No  | Yes | No  | No  | No  | Yes | Salaried job |              |
| No  | No  | Yes | No  | No  | No  | No  | Farmer       |              |
| Yes | Yes | Yes | Yes | Yes | Yes | Yes | Farmer       |              |
| Yes | Yes | Yes | Yes | Yes | Yes | Yes | Farmer       |              |
| No  | No  | Yes | No  | No  | Yes | No  | Farmer       |              |
| No  | No  | Yes | No  | No  | No  | No  | Others       | Artisan      |
| No  | No  | Yes | No  | No  | No  | Yes | Salaried job |              |
| No  | No  | Yes | No  | No  | No  | No  | Salaried job |              |
| No  | No  | No  | No  | No  | Yes | Yes | Farmer       |              |
| No  | No  | Yes | No  | No  | Yes | Yes | Farmer       |              |
| No  | No  | Yes | No  | No  | No  | No  | Farmer       |              |
| No  | No  | Yes | No  | No  | No  | No  | Salaried job |              |
| No  | Yes | Yes | No  | No  | No  | No  | Salaried job |              |
| No  | Yes | No  | No  | No  | No  | No  | Farmer       |              |
| No  | Yes | Yes | No  | No  | No  | No  | Pension      |              |
| No  | Yes | Yes | No  | No  | No  | No  | Farmer       |              |

|     |     |     |     |     |     |     |                    |
|-----|-----|-----|-----|-----|-----|-----|--------------------|
| No  | Yes | Yes | No  | No  | No  | No  | Farmer             |
| No  | Yes | Yes | No  | No  | No  | Yes | Farmer             |
| No  | No  | Yes | No  | No  | No  | No  | Farmer             |
| No  | No  | Yes | Yes | No  | No  | No  | Salaried job       |
| No  | Yes | Yes | No  | No  | Yes | Yes | Farmer             |
| No  | Yes | Yes | No  | No  | No  | No  | Salaried job       |
| No  | Yes | Yes | No  | No  | No  | No  | Farmer             |
| No  | Yes | Yes | No  | No  | No  | No  | Others Dry cleaner |
| No  | Yes | Yes | No  | No  | Yes | Yes | Others Casual labo |
| No  | Yes | Yes | No  | No  | No  | Yes | Others Casual labo |
| No  | Yes | Yes | No  | No  | Yes | No  | Salaried job       |
| No  | Yes | Yes | No  | No  | No  | No  | Salaried job       |
| No  | No  | Yes | Yes | Yes | Yes | Yes | Salaried job       |
| No  | No  | No  | No  | No  | No  | No  | Others Business m  |
| No  | No  | Yes | No  | No  | No  | Yes | Salaried job       |
| No  | Yes | Yes | No  | No  | No  | No  | Farmer             |
| No  | Yes | Yes | No  | No  | No  | No  | Farmer             |
| No  | Yes | Yes | No  | No  | No  | Yes | Farmer             |
| No  | Yes | Yes | No  | No  | No  | No  | Farmer             |
| No  | Yes | Yes | No  | No  | No  | No  | Farmer             |
| No  | No  | Yes | No  | No  | No  | No  | Farmer             |
| No  | No  | Yes | No  | No  | No  | No  | Farmer             |
| No  | No  | No  | No  | No  | No  | No  | Others Dependant   |
| No  | Yes | No  | No  | No  | No  | No  | Farmer             |
| No  | No  | Yes | No  | No  | No  | No  | Farmer             |
| No  | Yes | Yes | Yes | Yes | Yes | Yes | Farmer             |
| No  | No  | Yes | No  | No  | No  | No  | Farmer             |
| No  | No  | Yes | No  | No  | No  | No  | Farmer             |
| No  | Yes | Yes | Yes | No  | No  | Yes | Farmer             |
| No  | Yes | Yes | No  | No  | Yes | Yes | Farmer             |
| No  | Yes | Yes | No  | No  | Yes | No  | Farmer             |
| Yes | Yes | Yes | No  | No  | Yes | Yes | Farmer             |
| No  | Yes | Yes | No  | No  | Yes | Yes | Farmer             |
| No  | Yes | Yes | No  | No  | Yes | Yes | Farmer             |
| No  | No  | Yes | No  | No  | No  | No  | Farmer             |
| No  | No  | Yes | No  | No  | No  | No  | Farmer             |
| No  | No  | Yes | No  | No  | No  | No  | Farmer             |
| No  | Yes | Yes | Yes | No  | No  | No  | Farmer             |
| No  | Yes | Yes | No  | No  | No  | No  | Farmer             |
| No  | Yes | Yes | No  | No  | Yes | Yes | Farmer             |
| No  | Yes | Yes | No  | No  | Yes | Yes | Farmer             |
| No  | No  | Yes | No  | No  | No  | No  | Farmer             |
| No  | Yes | Yes | No  | No  | No  | No  | Farmer             |
| Yes | Yes | Yes | Yes | Yes | No  | Yes | Others Business m  |
| No  | No  | No  | No  | No  | No  | No  | Farmer             |

|     |     |     |     |     |     |     |                     |
|-----|-----|-----|-----|-----|-----|-----|---------------------|
| No  | No  | Yes | No  | No  | No  | No  | Farmer              |
| Yes | Yes | Yes | No  | No  | Yes | Yes | Salaried job        |
| No  | Yes | Yes | No  | No  | Yes | Yes | Pension             |
| No  | No  | Yes | No  | No  | No  | No  | Salaried job        |
| No  | No  | Yes | No  | No  | No  | No  | Farmer              |
| No  | No  | Yes | No  | No  | No  | No  | Farmer              |
| Yes | No  | Yes | No  | No  | No  | No  | Salaried job        |
| Yes | Yes | Yes | No  | No  | No  | No  | Farmer              |
| No  | Yes | Yes | No  | No  | Yes | Yes | Farmer              |
| No  | No  | Yes | No  | No  | No  | No  | Pension             |
| No  | No  | Yes | No  | No  | No  | No  | Farmer              |
| No  | Yes | Yes | No  | No  | No  | No  | Farmer              |
| No  | Yes | Yes | No  | No  | Yes | Yes | Farmer              |
| No  | No  | Yes | No  | No  | No  | No  | Farmer              |
| Yes | Yes | Yes | No  | No  | No  | Yes | Farmer              |
| No  | No  | Yes | No  | No  | No  | Yes | Salaried job        |
| No  | No  | Yes | No  | No  | No  | No  | Salaried job        |
| No  | Yes | Yes | No  | No  | No  | Yes | Farmer              |
| No  | No  | Yes | No  | No  | No  | No  | Farmer              |
| No  | Yes | Yes | No  | No  | Yes | No  | Farmer              |
| No  | No  | Yes | No  | No  | No  | No  | Farmer              |
| No  | Yes | Yes | No  | No  | Yes | Yes | Salaried job Farmer |
| No  | Yes | Yes | No  | No  | Yes | Yes | Farmer              |
| No  | Yes | Yes | No  | No  | No  | No  | Farmer              |
| No  | Yes | Yes | No  | No  | Yes | Yes | Farmer              |
| No  | No  | Yes | No  | Yes | No  | No  | Farmer              |
| No  | Yes | Yes | No  | No  | No  | No  | Farmer              |
| Yes | No  | Yes | Yes | Yes | No  | No  | Farmer              |
| No  | Yes | Yes | No  | No  | No  | Yes | Farmer              |
| No  | Yes | Yes | Yes | No  | No  | No  | Merchant            |
| No  | Yes | Yes | Yes | No  | Yes | No  | Salaried job        |
| No  | Yes | Yes | No  | No  | Yes | No  | Farmer              |
| Yes | Yes | Yes | No  | No  | Yes | No  | Farmer              |
| No  | No  | Yes | No  | No  | Yes | No  | Farmer              |
| No  | Yes | Yes | No  | No  | Yes | Yes | Farmer              |
| No  | No  | Yes | No  | No  | No  | No  | Farmer              |
| No  | No  | Yes | No  | No  | No  | No  | Farmer              |
| No  | Yes | Yes | No  | No  | No  | No  | Farmer              |
| No  | Yes | Yes | No  | No  | No  | No  | Farmer              |
| No  | No  | No  | No  | No  | No  | No  | Farmer              |
| No  | No  | Yes | No  | No  | No  | No  | Farmer              |
| Yes | Yes | Yes | Yes | Yes | Yes | Yes | Farmer              |
| Yes | Yes | Yes | Yes | Yes | Yes | Yes | Farmer              |
| No  | Yes | Yes | No  | No  | Yes | Yes | Farmer              |
| No  | No  | Yes | No  | No  | No  | No  | Farmer              |
| Yes | Yes | Yes | No  | No  | No  | No  | Farmer              |
| No  | No  | Yes | No  | No  | No  | No  | Farmer              |

|     |     |     |     |    |     |     |                   |
|-----|-----|-----|-----|----|-----|-----|-------------------|
| No  | No  | Yes | No  | No | No  | No  | Salaried job      |
| Yes | Yes | Yes | No  | No | No  | Yes | Farmer            |
| No  | Yes | No  | No  | No | No  | No  | Farmer            |
| No  | Yes | Yes | No  | No | Yes | Yes | Farmer            |
| Yes | Yes | Yes | Yes | No | Yes | Yes | Farmer            |
| No  | No  | Yes | No  | No | No  | No  | Farmer            |
| Yes | Yes | Yes | No  | No | Yes | No  | Farmer            |
| No  | No  | Yes | No  | No | No  | No  | Farmer            |
| Yes | Yes | Yes | No  | No | Yes | Yes | Others Business m |
| No  | No  | Yes | No  | No | No  | Yes | Farmer            |
| No  | No  | Yes | No  | No | Yes | No  | Farmer            |
| No  | No  | Yes | No  | No | No  | No  | Farmer            |
| Yes | No  | Yes | Yes | No | Yes | Yes | Farmer            |
| No  | No  | Yes | No  | No | No  | No  | Farmer            |
| No  | Yes | Yes | No  | No | No  | No  | Farmer            |
| No  | Yes | Yes | No  | No | No  | No  | Farmer            |
| No  | No  | Yes | No  | No | Yes | Yes | Farmer            |
| No  | No  | Yes | No  | No | Yes | Yes | Salaried job      |
| No  | Yes | No  | No  | No | No  | No  | Salaried job      |
| No  | Yes | Yes | No  | No | No  | No  | Farmer            |
| No  | Yes | Yes | No  | No | Yes | No  | Farmer            |
| No  | No  | Yes | No  | No | Yes | No  | Merchant          |
| No  | Yes | Yes | No  | No | No  | No  | Farmer            |
| No  | Yes | Yes | No  | No | Yes | Yes | Farmer            |
| Yes | Yes | Yes | No  | No | Yes | Yes | Farmer            |
| Yes | Yes | Yes | No  | No | Yes | Yes | Others Business m |
| Yes | Yes | Yes | No  | No | Yes | Yes | Farmer            |
| No  | Yes | Yes | No  | No | Yes | Yes | Farmer            |
| Yes | Yes | No  | No  | No | No  | Yes | Salaried job      |
| Yes | Yes | Yes | No  | No | No  | Yes | Others Business m |
| Yes | Yes | Yes | No  | No | No  | No  | Farmer            |
| No  | Yes | Yes | No  | No | No  | No  | Salaried job      |

| cattle | sheep | goats | chicken | bicycle | radio | tv | specify_otr | monthly_ir       |
|--------|-------|-------|---------|---------|-------|----|-------------|------------------|
|        | 1     | 3     | 4       | 30      | 0     | 1  | 1           | Over 15000       |
|        | 3     | 0     | 3       | 25      | 0     | 1  | 0           | 0-5000           |
|        | 0     | 0     | 0       | 0       | 0     | 0  | 0           | 0-5000           |
|        | 2     | 0     | 2       | 4       | 0     | 1  | 1           | 0-5000           |
|        | 6     | 0     | 5       | 13      | 1     | 1  | 0           | 0-5000           |
|        | 1     | 0     | 0       | 10      | 0     | 0  | 0           | 0-5000           |
|        | 3     | 2     | 0       | 10      | 0     | 1  | 0           | 5001-10000       |
|        | 0     | 0     | 2       | 9       | 0     | 1  | 0           | 0-5000           |
|        | 0     | 0     | 0       | 0       | 0     | 0  | 0           | Over 15000       |
|        | 5     | 0     | 8       | 13      | 0     | 1  | 0           | 0-5000           |
|        | 2     | 0     | 0       | 10      | 0     | 1  | 0           | 0-5000           |
|        | 3     | 0     | 4       | 9       | 1     | 1  | 0           | 0-5000           |
|        | 0     | 1     | 0       | 6       | 0     | 1  | 0           | 0-5000           |
|        | 8     | 10    | 0       | 16      | 0     | 1  | 0           | 0-5000           |
|        | 1     | 4     | 0       | 8       | 0     | 1  | 0           | 0-5000           |
|        | 2     | 6     | 0       | 12      | 0     | 0  | 0           | 0-5000           |
|        | 0     | 0     | 4       | 9       | 0     | 0  | 0           | 0-5000           |
|        | 2     | 0     | 0       | 3       | 0     | 1  | 0           | 0-5000           |
|        | 2     | 0     | 0       | 10      | 0     | 1  | 0           | 0-5000           |
|        | 1     | 0     | 0       | 0       | 0     | 1  | 0           | 0-5000           |
|        | 6     | 14    | 0       | 18      | 1     | 1  | 0           | 0-5000           |
|        | 4     | 0     | 0       | 18      | 0     | 1  | 0           | 0-5000           |
|        | 3     | 6     | 0       | 11      | 0     | 0  | 0           | 0-5000           |
|        | 0     | 4     | 11      | 18      | 0     | 1  | 0           | 0-5000           |
|        | 4     | 2     | 10      | 18      | 0     | 1  | 1           | 0-5000           |
|        | 0     | 2     | 0       | 11      | 0     | 0  | 0           | 0-5000           |
|        | 2     | 0     | 0       | 7       | 0     | 0  | 0           | 0-5000           |
|        | 2     | 0     | 0       | 5       | 0     | 0  | 0           | 0-5000           |
|        | 0     | 2     | 0       | 0       | 0     | 1  | 0           | 0-5000           |
|        | 0     | 0     | 0       | 0       | 0     | 0  | 1           | 0-5000           |
|        | 0     | 0     | 0       | 2       | 0     | 1  | 0           | 0-5000           |
|        | 2     | 0     | 0       | 0       | 1     | 0  | 0           | 5001-10000       |
|        | 4     | 1     | 0       | 0       | 1     | 1  | 0           | 0-5000           |
|        | 2     | 0     | 0       | 6       | 1     | 1  | 1           | 5001-10000       |
|        | 3     | 6     | 0       | 7       | 0     | 1  | 1           | Motorbike 0-5000 |
|        | 0     | 0     | 0       | 0       | 0     | 1  | 0           | 5001-10000       |
|        | 0     | 0     | 0       | 20      | 1     | 1  | 1           | 5001-10000       |
|        | 8     | 0     | 0       | 20      | 1     | 1  | 0           | 5001-10000       |
|        | 6     | 0     | 10      | 14      | 0     | 1  | 0           | 0-5000           |
|        | 8     | 4     | 0       | 20      | 1     | 1  | 1           | 5001-10000       |
|        | 8     | 18    | 0       | 12      | 1     | 1  | 1           | 10001-15000      |
|        | 4     | 18    | 12      | 11      | 1     | 1  | 1           | Over 15000       |
|        | 0     | 0     | 0       | 0       | 0     | 1  | 0           | 0-5000           |
|        | 5     | 15    | 0       | 18      | 0     | 1  | 1           | Over 15000       |
|        | 4     | 3     | 0       | 10      | 0     | 1  | 1           | Over 15000       |
|        | 4     | 9     | 6       | 18      | 1     | 1  | 1           | 5001-10000       |

|    |    |    |    |   |   |       |             |
|----|----|----|----|---|---|-------|-------------|
| 6  | 0  | 0  | 14 | 0 | 1 | 0     | 0-5000      |
| 2  | 0  | 8  | 12 | 0 | 1 | 0     | 0-5000      |
| 4  | 16 | 0  | 14 | 0 | 1 | 0     | 0-5000      |
| 0  | 0  | 0  | 8  | 0 | 1 | 0     | 5001-10000  |
| 1  | 0  | 0  | 12 | 0 | 0 | 0     | 0-5000      |
| 12 | 0  | 0  | 18 | 0 | 1 | 1     | Over 15000  |
| 2  | 6  | 0  | 12 | 0 | 0 | 0     | 0-5000      |
| 1  | 0  | 0  | 4  | 0 | 1 | 0     | 0-5000      |
| 1  | 2  | 5  | 10 | 0 | 1 | 0     | 0-5000      |
| 2  | 3  | 0  | 0  | 0 | 0 | 0     | 5001-10000  |
| 0  | 1  | 0  | 7  | 0 | 0 | 0     | 0-5000      |
| 2  | 1  | 0  | 5  | 0 | 1 | 1     | 5001-10000  |
| 0  | 0  | 0  | 0  | 0 | 0 | 0     | 0-5000      |
| 1  | 0  | 0  | 0  | 0 | 1 | 0     | 0-5000      |
| 0  | 0  | 0  | 0  | 0 | 0 | 0     | 5001-10000  |
| 5  | 0  | 0  | 2  | 0 | 1 | 0     | 5001-10000  |
| 2  | 3  | 0  | 0  | 1 | 1 | 0     | 0-5000      |
| 1  | 0  | 0  | 0  | 0 | 0 | 0     | 0-5000      |
| 1  | 3  | 0  | 3  | 0 | 0 | 0     | 0-5000      |
| 1  | 2  | 0  | 0  | 0 | 1 | 0     | 0-5000      |
| 2  | 4  | 1  | 18 |   | 1 | 1     | 0-5000      |
| 2  | 0  | 0  | 10 | 1 | 1 | 1     | 0-5000      |
| 5  | 0  | 0  | 29 | 0 | 1 | 1     | 10001-15000 |
| 1  | 2  | 0  | 5  | 0 | 1 | 1 Car | Over 15000  |
| 0  | 0  | 1  | 6  | 0 | 1 | 0     | 0-5000      |
| 2  | 1  | 10 | 15 | 1 | 1 | 1     | 0-5000      |
| 1  | 3  | 0  | 20 | 0 | 1 | 1     | Over 15000  |
| 3  | 2  | 5  | 26 | 0 | 0 | 1     | 0-5000      |
| 3  | 4  | 9  | 16 | 1 | 1 | 1     | 5001-10000  |
| 2  | 0  | 3  | 18 | 1 | 1 | 1     | 5001-10000  |
| 4  | 1  | 4  | 18 | 1 | 1 | 1     | Over 15000  |
| 0  | 2  | 0  | 20 | 0 | 1 | 1     | Over 15000  |
| 0  | 0  | 0  | 3  | 0 | 1 | 0     | 0-5000      |
| 3  | 60 | 0  | 4  | 0 | 1 | 0     | 0-5000      |
| 2  | 0  | 0  | 10 | 0 | 1 | 1     | 5001-10000  |
| 1  | 2  | 1  | 0  | 0 | 1 | 0     | 0-5000      |
| 3  | 0  | 0  | 0  | 0 | 1 | 0     | 0-5000      |
| 2  | 2  | 0  | 20 | 1 | 1 | 1     | 0-5000      |
| 1  | 0  | 1  | 2  | 0 | 0 | 0     | 0-5000      |
| 0  | 0  | 2  | 7  | 0 | 1 | 0     | 0-5000      |
| 0  | 0  | 0  | 13 | 0 | 0 | 0     | 0-5000      |
| 0  | 0  | 1  | 1  | 0 | 0 | 0     | 0-5000      |
| 0  | 0  | 0  | 0  | 0 | 2 | 0     | 0-5000      |
| 1  | 0  | 0  | 10 | 0 | 1 | 0     | 0-5000      |
| 1  | 0  | 0  | 8  | 0 | 1 | 0     | 0-5000      |
| 0  | 0  | 0  | 0  | 1 | 1 | 1     | 0-5000      |
| 0  | 0  | 0  | 0  | 1 | 1 | 1     | 0-5000      |



|    |   |    |    |   |   |       |            |
|----|---|----|----|---|---|-------|------------|
| 0  | 0 | 1  | 6  | 0 | 0 | 1     | 0-5000     |
| 2  | 0 | 0  | 12 | 0 | 1 | 1     | 0-5000     |
| 0  | 0 | 0  | 7  | 0 | 1 | 1     | 0-5000     |
| 1  | 0 | 0  | 1  | 1 | 0 | 0     | 0-5000     |
| 1  | 1 | 0  | 5  | 0 | 0 | 0     | 0-5000     |
| 2  | 0 | 0  | 20 | 1 | 1 | 1     | 0-5000     |
| 0  | 0 | 2  | 4  | 0 | 0 | 0     | 0-5000     |
| 2  | 0 | 4  | 16 | 1 | 1 | 0     | 0-5000     |
| 0  | 0 | 5  | 11 | 0 | 1 | 0     | 0-5000     |
| 2  | 1 | 1  | 2  | 0 | 0 | 0     | 0-5000     |
| 2  | 0 | 8  | 20 | 1 | 1 | 0     | 0-5000     |
| 10 | 3 | 15 | 10 | 2 | 1 | 1     | 5001-10000 |
| 2  | 0 | 5  | 10 | 1 | 1 | 1     | 5001-10000 |
| 0  | 0 | 6  | 8  | 1 | 1 | 0     | 5001-10000 |
| 5  | 0 | 10 | 20 | 0 | 0 | 0     | 5001-10000 |
| 3  | 0 | 25 | 10 | 0 | 1 | 0 Car | 5001-10000 |
| 2  | 0 | 7  | 10 | 1 | 1 | 1     | 5001-10000 |
| 1  | 0 | 1  | 0  | 0 | 1 | 0     | 0-5000     |
| 0  | 0 | 3  | 4  | 0 | 1 | 0     | 0-5000     |
| 7  | 0 | 5  | 8  | 1 | 1 | 1     | 5001-10000 |
| 0  | 1 | 1  | 0  | 0 | 1 | 0     | 0-5000     |
| 2  | 0 | 0  | 3  | 0 | 0 | 0     | 0-5000     |
| 0  | 0 | 0  | 1  | 1 | 0 | 0     | 0-5000     |
| 0  | 0 | 0  | 6  | 1 | 0 | 0     | 0-5000     |
| 0  | 0 | 0  | 0  | 0 | 0 | 0     | 0-5000     |
| 2  | 0 | 10 | 20 | 0 | 1 | 0     | 0-5000     |
| 0  | 0 | 0  | 0  | 0 | 0 | 0     | 0-5000     |
| 0  | 0 | 5  | 15 | 0 | 1 | 1     | 0-5000     |
| 0  | 0 | 7  | 10 | 1 | 1 | 0     | 0-5000     |
| 4  | 0 | 2  | 20 | 1 | 2 | 1     | 0-5000     |
| 1  | 0 | 2  | 10 | 0 | 1 | 0     | 0-5000     |
| 0  | 0 | 2  | 6  | 0 | 1 | 0     | 0-5000     |
| 3  | 0 | 0  | 35 | 7 | 2 | 1     | 5001-10000 |
| 0  | 0 | 0  | 5  | 0 | 2 | 0     | 0-5000     |
| 8  | 0 | 2  | 15 | 1 | 1 | 1     | 5001-10000 |
| 0  | 3 | 4  | 2  | 1 | 0 | 0     | 0-5000     |
| 1  | 0 | 0  | 9  | 2 | 1 | 1     | 0-5000     |
| 0  | 0 | 1  | 0  | 1 | 1 | 0     | 0-5000     |
| 0  | 0 | 1  | 3  | 0 | 0 | 0     | 0-5000     |
| 4  | 0 | 4  | 2  | 0 | 3 | 1     | 0-5000     |
| 2  | 2 | 0  | 10 | 0 | 1 | 1     | 0-5000     |
| 0  | 0 | 0  | 0  | 0 | 0 | 0     | 0-5000     |
| 4  | 0 | 1  | 10 | 1 | 3 | 2     | 0-5000     |
| 0  | 0 | 5  | 0  | 0 | 1 | 0     | 0-5000     |
| 2  | 0 | 4  | 7  | 0 | 1 | 1     | 0-5000     |
| 0  | 0 | 1  | 6  | 0 | 1 | 0     | 0-5000     |
| 3  | 0 | 3  | 10 | 0 | 1 | 1     | 0-5000     |

|   |   |    |    |   |   |   |             |
|---|---|----|----|---|---|---|-------------|
| 2 | 1 | 0  | 2  | 0 | 1 | 0 | 0-5000      |
| 2 | 0 | 0  | 10 | 2 | 1 | 0 | 0-5000      |
| 2 | 0 | 1  | 10 | 0 | 1 | 1 | Over 15000  |
| 2 | 3 | 3  | 5  | 0 | 0 | 0 | 0-5000      |
| 1 | 0 | 0  | 2  | 0 | 1 | 0 | 0-5000      |
| 0 | 0 | 3  | 1  | 0 | 1 | 1 | 0-5000      |
| 0 | 0 | 0  | 0  | 1 | 0 | 0 | 0-5000      |
| 2 | 0 | 3  | 30 | 0 | 1 | 1 | Over 15000  |
| 0 | 0 | 2  | 6  | 0 | 1 | 0 | 0-5000      |
| 2 | 0 | 1  | 20 | 0 | 1 | 1 | Over 15000  |
| 0 | 0 | 0  | 15 | 0 | 1 | 1 | 0-5000      |
| 2 | 0 | 0  | 7  | 0 | 1 | 0 | 0-5000      |
| 2 | 0 | 0  | 0  | 0 | 1 | 1 | 0-5000      |
| 0 | 0 | 0  | 0  | 0 | 0 | 1 | 0-5000      |
| 0 | 0 | 0  | 1  | 0 | 1 | 0 | 5001-10000  |
| 0 | 0 | 0  | 0  | 0 | 1 | 1 | 0-5000      |
| 0 | 0 | 0  | 15 | 0 | 1 | 0 | 0-5000      |
| 0 | 0 | 6  | 0  | 0 | 0 | 0 | 0-5000      |
| 2 | 0 | 2  | 5  | 0 | 0 | 0 | 0-5000      |
| 2 | 1 | 1  | 0  | 0 | 0 | 0 | 0-5000      |
| 2 | 1 | 1  | 1  | 0 | 0 | 0 | 0-5000      |
| 1 | 1 | 2  | 0  | 0 | 0 | 0 | 0-5000      |
| 1 | 2 | 1  | 1  | 0 | 0 | 0 | 0-5000      |
| 0 | 0 | 2  | 1  | 0 | 0 | 0 | 0-5000      |
| 2 | 0 | 0  | 11 | 0 | 1 | 0 | 0-5000      |
| 0 | 0 | 2  | 3  | 0 | 0 | 0 | 0-5000      |
| 0 | 1 | 2  | 1  | 1 | 0 | 0 | 0-5000      |
| 0 | 0 | 4  | 6  | 0 | 0 | 0 | 0-5000      |
| 6 | 0 | 22 | 18 | 1 | 1 | 0 | 5001-10000  |
| 5 | 0 | 1  | 20 | 1 | 1 | 0 | 0-5000      |
| 0 | 0 | 4  | 12 | 1 | 0 | 0 | 0-5000      |
| 0 | 0 | 2  | 6  | 0 | 1 | 0 | 5001-10000  |
| 0 | 0 | 7  | 12 | 1 | 2 | 0 | 0-5000      |
| 2 | 1 | 10 | 5  | 0 | 1 | 0 | 5001-10000  |
| 3 | 2 | 5  | 1  | 0 | 1 | 0 | 5001-10000  |
| 0 | 5 | 10 | 0  | 1 | 0 | 1 | 0-5000      |
| 0 | 0 | 10 | 10 | 1 | 1 | 0 | 0-5000      |
| 0 | 0 | 4  | 5  | 0 | 1 | 0 | Over 15000  |
| 5 | 0 | 3  | 6  | 0 | 1 | 0 | 10001-15000 |
| 8 | 2 | 14 | 20 | 2 | 3 | 0 | 5001-10000  |
| 1 | 2 | 0  | 5  | 0 | 0 | 0 | 0-5000      |
| 2 | 0 | 3  | 4  | 0 | 1 | 0 | 0-5000      |
| 2 | 0 | 3  | 20 | 1 | 1 | 1 | 5001-10000  |
| 0 | 0 | 8  | 7  | 1 | 1 | 0 | 5001-10000  |
| 8 | 0 | 0  | 25 | 0 | 0 | 1 | 5001-10000  |
| 7 | 0 | 1  | 10 | 1 | 2 | 1 | 5001-10000  |
| 8 | 0 | 1  | 6  | 2 | 1 | 0 | 10001-15000 |

|   |    |    |     |   |   |           |             |
|---|----|----|-----|---|---|-----------|-------------|
| 2 | 3  | 3  | 5   | 1 | 1 | 0         | 0-5000      |
| 2 | 0  | 3  | 18  | 0 | 1 | 0         | 0-5000      |
| 0 | 0  | 4  | 0   | 0 | 1 | 0         | 0-5000      |
| 1 | 0  | 0  | 0   | 1 | 1 | 1         | 0-5000      |
| 3 | 0  | 11 | 15  | 0 | 0 | 0         | 0-5000      |
| 3 | 0  | 1  | 12  | 1 | 1 | 0         | 5001-10000  |
| 1 | 0  | 5  | 6   | 1 | 1 | 0         | 0-5000      |
| 0 | 0  | 3  | 0   | 0 | 1 | 0         | 0-5000      |
| 2 | 0  | 2  | 5   | 0 | 1 | 0         | 10001-15000 |
| 0 | 0  | 0  | 2   | 0 | 0 | 0         | 0-5000      |
| 0 | 0  | 0  | 40  | 0 | 1 | 1         | Over 15000  |
| 4 | 5  | 7  | 23  | 1 | 1 | 1         | Over 15000  |
| 0 | 0  | 0  | 4   | 0 | 1 | 1         | 10001-15000 |
| 4 | 3  | 0  | 4   | 0 | 0 | 0         | 0-5000      |
| 2 | 0  | 0  | 10  | 0 | 1 | 0         | Over 15000  |
| 2 | 0  | 0  | 20  | 1 | 1 | 0         | 0-5000      |
| 2 | 0  | 10 | 6   | 0 | 1 | 0         | 0-5000      |
| 1 | 0  | 10 | 6   | 0 | 1 | 0         | 0-5000      |
| 0 | 0  | 2  | 6   | 0 | 1 | 0         | 0-5000      |
| 1 | 0  | 3  | 16  | 0 | 1 | 0         | 0-5000      |
| 1 | 0  | 6  | 7   | 0 | 0 | 0         | 0-5000      |
| 2 | 0  | 2  | 25  | 1 | 1 | 0         | 0-5000      |
| 2 | 0  | 4  | 15  | 1 | 1 | 0         | 0-5000      |
| 4 | 1  | 2  | 25  | 0 | 1 | 1         | 10001-15000 |
| 0 | 2  | 5  | 10  | 0 | 1 | 0         | 5001-10000  |
| 1 | 2  | 3  | 100 | 1 | 1 | 1         | Over 15000  |
| 0 | 0  | 2  | 25  | 0 | 1 | 0         | 0-5000      |
| 0 | 0  | 0  | 10  | 1 | 1 | 1         | 0-5000      |
| 0 | 0  | 4  | 6   | 0 | 1 | 0         | 0-5000      |
| 3 | 6  | 0  | 20  | 0 | 1 | 1 Tractor | 10001-15000 |
| 3 | 4  | 0  | 10  | 1 | 1 | 1         | 5001-10000  |
| 4 | 4  | 0  | 10  | 0 | 0 | 0         | 5001-10000  |
| 8 | 4  | 1  | 10  | 0 | 1 | 1         | 10001-15000 |
| 3 | 7  | 0  | 12  | 1 | 0 | 0         | 5001-10000  |
| 1 | 0  | 0  | 2   | 0 | 0 | 0         | 0-5000      |
| 1 | 0  | 0  | 5   | 0 | 0 | 0         | 0-5000      |
| 2 | 0  | 0  | 5   | 1 | 1 | 0         | 5001-10000  |
| 8 | 0  | 0  | 15  | 1 | 1 | 1         | 5001-10000  |
| 3 | 0  | 0  | 5   | 0 | 1 | 1         | 0-5000      |
| 5 | 0  | 0  | 40  | 3 | 4 | 1         | Over 15000  |
| 3 | 0  | 6  | 14  | 1 | 1 | 0         | 0-5000      |
| 2 | 3  | 7  | 13  | 1 | 1 | 0         | 5001-10000  |
| 2 | 0  | 4  | 5   | 0 | 1 | 0         | 0-5000      |
| 7 | 0  | 0  | 25  | 1 | 1 | 1         | Over 15000  |
| 5 | 11 | 0  | 11  | 1 | 1 | 1         | Over 15000  |
| 0 | 0  | 4  | 10  | 0 | 1 | 1         | 0-5000      |
| 2 | 2  | 0  | 10  | 0 | 1 | 0         | 0-5000      |

|    |    |    |    |   |   |   |                        |
|----|----|----|----|---|---|---|------------------------|
| 1  | 2  | 6  | 0  | 0 | 0 | 1 | 5001-10000             |
| 3  | 6  | 4  | 20 | 2 | 1 | 1 | Over 15000             |
| 4  | 11 | 0  | 9  | 0 | 1 | 1 | 10001-15000            |
| 3  | 0  | 0  | 5  | 0 | 1 | 1 | Over 15000             |
| 0  | 0  | 0  | 0  | 0 | 0 | 0 | 0-5000                 |
| 5  | 2  | 0  | 10 | 1 | 1 | 1 | 10001-15000            |
| 2  | 0  | 2  | 25 | 1 | 1 | 1 | 5001-10000             |
| 3  | 4  | 0  | 12 | 1 | 1 | 0 | 5001-10000             |
| 4  | 7  | 0  | 9  | 0 | 1 | 1 | 5001-10000             |
| 5  | 0  | 0  | 15 | 0 | 0 | 0 | 0-5000                 |
| 0  | 0  | 0  | 7  | 0 | 0 | 0 | 0-5000                 |
| 3  | 0  | 2  | 8  | 0 | 0 | 0 | 0-5000                 |
| 5  | 7  | 3  | 11 | 0 | 1 | 1 | 5001-10000             |
| 3  | 0  | 0  | 0  | 0 | 0 | 0 | 0-5000                 |
| 1  | 0  | 0  | 3  | 1 | 1 | 0 | 0-5000                 |
| 1  | 1  | 10 | 3  | 1 | 1 | 1 | 1 Motorbike 5001-10000 |
| 3  | 3  | 0  | 5  | 0 | 1 | 1 | Over 15000             |
| 2  | 2  | 0  | 3  | 0 | 1 | 0 | 0-5000                 |
| 1  | 0  | 0  | 10 | 0 | 1 | 1 | 0-5000                 |
| 3  | 0  | 1  | 5  | 1 | 2 | 0 | 0-5000                 |
| 6  | 1  | 0  | 0  | 0 | 1 | 1 | 10001-15000            |
| 6  | 0  | 0  | 5  | 1 | 1 | 1 | Over 15000             |
| 0  | 0  | 4  | 14 | 1 | 1 | 0 | 5001-10000             |
| 4  | 5  | 0  | 40 | 1 | 1 | 1 | 10001-15000            |
| 1  | 0  | 0  | 5  | 0 | 0 | 0 | 0-5000                 |
| 1  | 1  | 1  | 6  | 1 | 1 | 1 | 5001-10000             |
| 8  | 7  | 0  | 30 | 1 | 1 | 1 | Over 15000             |
| 1  | 2  | 4  | 5  | 0 | 1 | 1 | 0-5000                 |
| 0  | 0  | 0  | 0  | 0 | 0 | 0 | 0-5000                 |
| 6  | 4  | 3  | 13 | 1 | 1 | 0 | 0-5000                 |
| 4  | 0  | 0  | 18 | 0 | 1 | 1 | Over 15000             |
| 2  | 3  | 1  | 3  | 0 | 0 | 0 | 0-5000                 |
| 10 | 7  | 2  | 15 | 2 | 1 | 1 | 0-5000                 |
| 3  | 0  | 7  | 10 | 1 | 2 | 1 | 5001-10000             |
| 7  | 3  | 6  | 4  | 0 | 1 | 1 | 0-5000                 |
| 5  | 0  | 0  | 10 | 0 | 0 | 0 | 0-5000                 |
| 3  | 2  | 0  | 5  | 1 | 1 | 0 | Over 15000             |
| 5  | 0  | 0  | 20 | 0 | 0 | 0 | 0-5000                 |
| 3  | 0  | 0  | 0  | 0 | 0 | 0 | 0-5000                 |
| 0  | 0  | 0  | 2  | 0 | 1 | 0 | 0-5000                 |
| 3  | 0  | 0  | 10 | 0 | 1 | 0 | 5001-10000             |
| 2  | 2  | 0  | 10 | 0 | 0 | 0 | 10001-15000            |
| 2  | 4  | 0  | 12 | 0 | 1 | 0 | 5001-10000             |
| 3  | 5  | 4  | 14 | 1 | 0 | 1 | 5001-10000             |
| 0  | 2  | 0  | 8  | 0 | 0 | 0 | 0-5000                 |
| 2  | 0  | 0  | 20 | 0 | 1 | 0 | 0-5000                 |
| 3  | 0  | 0  | 10 | 1 | 1 | 0 | 5001-10000             |

|    |    |    |     |   |   |   |             |
|----|----|----|-----|---|---|---|-------------|
| 2  | 0  | 0  | 10  | 0 | 1 | 1 | 10001-15000 |
| 0  | 0  | 0  | 0   | 0 | 0 | 0 | 0-5000      |
| 6  | 12 | 1  | 32  | 0 | 1 | 1 | 5001-10000  |
| 6  | 7  | 23 | 110 | 1 | 1 | 1 | Over 15000  |
| 3  | 4  | 0  | 0   | 0 | 0 | 0 | 5001-10000  |
| 3  | 0  | 0  | 12  | 0 | 1 | 1 | 5001-10000  |
| 6  | 0  | 0  | 1   | 2 | 1 | 0 | 0-5000      |
| 5  | 1  | 0  | 12  | 1 | 1 | 1 | 10001-15000 |
| 1  | 0  | 0  | 0   | 0 | 1 | 1 | 10001-15000 |
| 0  | 0  | 0  | 20  | 0 | 1 | 1 | 5001-10000  |
| 2  | 0  | 2  | 18  | 1 | 1 | 1 | 0-5000      |
| 3  | 0  | 0  | 20  | 0 | 1 | 1 | 0-5000      |
| 0  | 0  | 1  | 3   | 0 | 1 | 0 | 0-5000      |
| 0  | 0  | 0  | 5   | 0 | 0 | 0 | 0-5000      |
| 1  | 2  | 2  | 10  | 0 | 1 | 0 | 0-5000      |
| 8  | 1  | 7  | 15  | 1 | 1 | 0 | 0-5000      |
| 5  | 3  | 1  | 10  | 1 | 1 | 1 | 0-5000      |
| 0  | 0  | 0  | 2   | 0 | 1 | 1 | Over 15000  |
| 0  | 0  | 0  | 0   | 0 | 0 | 1 | 0-5000      |
| 0  | 0  | 1  | 3   | 0 | 1 | 0 | 0-5000      |
| 4  | 0  | 5  | 10  | 0 | 1 | 0 | 0-5000      |
| 1  | 0  | 0  | 2   | 0 | 1 | 0 | 0-5000      |
| 0  | 1  | 0  | 0   | 0 | 1 | 0 | 0-5000      |
| 3  | 0  | 1  | 6   | 1 | 1 | 0 | 5001-10000  |
| 2  | 0  | 0  | 0   | 0 | 0 | 0 | 5001-10000  |
| 2  | 3  | 0  | 10  | 0 | 0 | 0 | 5001-10000  |
| 3  | 5  | 0  | 10  | 0 | 0 | 0 | 10001-15000 |
| 0  | 0  | 0  | 0   | 0 | 0 | 0 | 5001-10000  |
| 2  | 5  | 3  | 20  | 0 | 1 | 1 | 10001-15000 |
| 1  | 0  | 0  | 10  | 1 | 0 | 1 | 10001-15000 |
| 1  | 0  | 0  | 10  | 1 | 1 | 1 | 10001-15000 |
| 0  | 0  | 0  | 7   | 1 | 1 | 0 | 0-5000      |
| 10 | 8  | 0  | 40  | 1 | 1 | 0 | Over 15000  |



|                              |     |     |     |     |     |
|------------------------------|-----|-----|-----|-----|-----|
| 1 Self owned Semi- perrr No  | Yes | No  | N/A | Yes | No  |
| 1 Self owned Temporary No    | Yes | No  | N/A | Yes | No  |
| 1 Self owned Semi- perrr No  | Yes | No  | N/A | Yes | No  |
| 1 Self owned Temporary No    | Yes | No  | N/A | Yes | No  |
| 1 Self owned Temporary No    | No  | Yes | N/A | Yes | No  |
| 1 Self owned Semi- perrr No  | Yes | No  | N/A | Yes | No  |
| 1 Self owned Semi- perrr No  | No  | No  | N/A | Yes | No  |
| 1 Self owned Semi- perrr No  | Yes | No  | N/A | Yes | No  |
| 1 Self owned Semi- perrr No  | No  | No  | N/A | Yes | No  |
| 1 Self owned Semi- perrr No  | Yes | No  | N/A | Yes | No  |
| 1 Self owned Semi- perrr No  | Yes | No  | N/A | Yes | No  |
| 1 Self owned Semi- perrr No  | Yes | No  | N/A | Yes | No  |
| 1 Self owned Permanent No    | Yes | No  | N/A | Yes | No  |
| 1 Self owned Semi- perrr No  | Yes | No  | N/A | Yes | No  |
| 1 Self owned Permanent Yes   | No  | No  | N/A | No  | Yes |
| 1 Self owned Semi- perrr No  | Yes | No  | N/A | Yes | No  |
| 1 Self owned Semi- perrr No  | No  | Yes | N/A | Yes | No  |
| 1 Self owned Semi- perrr No  | No  | Yes | N/A | Yes | No  |
| 1 Self owned Semi- perrr No  | No  | Yes | N/A | Yes | No  |
| 1 Self owned Permanent Yes   | No  | No  | N/A | Yes | No  |
| 1 Self owned Semi- perrr No  | Yes | No  | N/A | Yes | No  |
| 1 Self owned Permanent Yes   | No  | No  | N/A | No  | Yes |
| 1 Self owned Permanent Yes   | No  | No  | N/A | Yes | Yes |
| 1 Self owned Permanent No    | Yes | No  | N/A | Yes | No  |
| 1 Self owned Permanent No    | No  | Yes | N/A | Yes | No  |
| 1 Self owned Permanent Yes   | No  | No  | N/A | Yes | No  |
| 1 Self owned Semi- perrr No  | No  | Yes | N/A | Yes | No  |
| 1 Self owned Permanent No    | No  | Yes | N/A | Yes | No  |
| 1 Self owned Permanent No    | Yes | No  | N/A | Yes | No  |
| 1 Self owned Permanent Yes   | No  | No  | N/A | Yes | No  |
| 1 Self owned Semi- perrr Yes | No  | No  | N/A | Yes | No  |
| 1 Self owned Semi- perrr No  | No  | Yes | N/A | Yes | No  |
| 1 Self owned Semi- perrr No  | No  | Yes | N/A | Yes | No  |
| 1 Self owned Semi- perrr No  | Yes | No  | N/A | Yes | No  |
| 1 Self owned Semi- perrr No  | No  | No  | N/A | No  | No  |
| 1 Self owned Semi- perrr No  | No  | Yes | N/A | Yes | No  |
| 1 Self owned Semi- perrr No  | No  | Yes | N/A | Yes | No  |
| 1 Self owned Semi- perrr No  | No  | Yes | N/A | Yes | No  |
| 1 Self owned Semi- perrr No  | No  | Yes | N/A | Yes | No  |
| 1 Self owned Temporary No    | No  | Yes | N/A | Yes | No  |
| 1 Self owned Temporary No    | No  | Yes | N/A | Yes | No  |
| 1 Self owned Permanent Yes   | No  | No  | N/A | Yes | No  |
| 1 Self owned Semi- perrr No  | No  | Yes | N/A | Yes | No  |
| 1 Self owned Semi- perrr Yes | No  | No  | N/A | Yes | No  |
| 1 Self owned Semi- perrr No  | No  | Yes | N/A | Yes | No  |
| 1 Self owned Permanent No    | Yes | No  | N/A | Yes | No  |

|                              |     |     |     |     |     |
|------------------------------|-----|-----|-----|-----|-----|
| 1 Self owned Semi- perrr Yes | No  | No  | N/A | Yes | No  |
| 1 Self owned Permanent Yes   | No  | No  | N/A | Yes | No  |
| 1 Self owned Semi- perrr Yes | No  | No  | N/A | Yes | No  |
| 1 Self owned Semi- perrr Yes | No  | No  | N/A | Yes | No  |
| 0 Self owned Semi- perrr Yes | No  | No  | N/A | Yes | No  |
| 1 Self owned Permanent Yes   | No  | No  | N/A | Yes | No  |
| 1 Self owned Semi- perrr No  | Yes | No  | N/A | Yes | No  |
| 1 Self owned Semi- perrr No  | Yes | No  | N/A | Yes | No  |
| 1 Self owned Semi- perrr No  | No  | Yes | N/A | Yes | No  |
| 1 Self owned Semi- perrr No  | No  | Yes | N/A | Yes | No  |
| 1 Self owned Semi- perrr No  | No  | Yes | N/A | Yes | No  |
| 1 Self owned Semi- perrr No  | Yes | No  | N/A | Yes | No  |
| 1 Self owned Semi- perrr No  | No  | Yes | N/A | Yes | No  |
| 1 Self owned Permanent No    | Yes | No  | N/A | Yes | No  |
| 1 Self owned Semi- perrr No  | No  | Yes | N/A | Yes | No  |
| 1 Self owned Permanent No    | No  | Yes | N/A | Yes | No  |
| 1 Self owned Semi- perrr No  | No  | Yes | N/A | Yes | No  |
| 1 Self owned Permanent No    | Yes | No  | N/A | Yes | No  |
| 1 Self owned Permanent No    | Yes | No  | N/A | Yes | No  |
| 1 Self owned Temporary No    | No  | Yes | N/A | Yes | No  |
| 1 Self owned Temporary No    | No  | Yes | N/A | Yes | No  |
| 1 Self owned Permanent No    | No  | Yes | N/A | Yes | No  |
| 1 Self owned Permanent No    | No  | Yes | N/A | Yes | No  |
| 1 Self owned Permanent No    | Yes | No  | N/A | Yes | No  |
| 1 Self owned Permanent No    | Yes | No  | N/A | Yes | No  |
| 1 Self owned Semi- perrr Yes | No  | No  | N/A | Yes | No  |
| 1 Self owned Semi- perrr No  | No  | Yes | N/A | Yes | No  |
| 1 Self owned Permanent No    | No  | Yes | N/A | Yes | No  |
| 1 Self owned Permanent No    | No  | Yes | N/A | Yes | Yes |
| 1 Self owned Permanent No    | No  | Yes | N/A | Yes | No  |
| 1 Self owned Permanent No    | Yes | No  | N/A | Yes | Yes |
| 1 Self owned Permanent Yes   | No  | No  | N/A | Yes | No  |
| 1 Self owned Permanent Yes   | No  | No  | N/A | Yes | Yes |
| 1 Self owned Semi- perrr No  | No  | Yes | N/A | Yes | No  |
| 1 Self owned Semi- perrr No  | No  | Yes | N/A | Yes | No  |
| 1 Self owned Permanent No    | No  | Yes | N/A | Yes | No  |
| 1 Self owned Permanent Yes   | No  | No  | N/A | Yes | No  |
| 1 Self owned Permanent Yes   | No  | No  | N/A | Yes | No  |
| 1 Self owned Temporary No    | No  | Yes | N/A | Yes | No  |
| 1 Self owned Permanent Yes   | No  | No  | N/A | Yes | No  |
| 1 Self owned Permanent No    | No  | Yes | N/A | Yes | No  |
| 1 Self owned Permanent Yes   | No  | No  | N/A | Yes | No  |





|                             |     |     |     |     |     |
|-----------------------------|-----|-----|-----|-----|-----|
| 1 Self owned Permanent No   | Yes | No  | N/A | Yes | No  |
| 1 Self owned Permanent No   | Yes | No  | N/A | Yes | No  |
| 1 Self owned Permanent No   | Yes | No  | N/A | Yes | No  |
| 1 Self owned Permanent No   | Yes | No  | N/A | No  | Yes |
| 1 Self owned Permanent No   | Yes | No  | N/A | Yes | No  |
| 1 Self owned Permanent No   | Yes | No  | N/A | Yes | No  |
| 1 Self owned Permanent No   | No  | Yes | N/A | Yes | No  |
| 1 Self owned Permanent No   | Yes | No  | N/A | Yes | No  |
| 1 Self owned Permanent No   | Yes | No  | N/A | Yes | No  |
| 1 Self owned Permanent No   | Yes | No  | N/A | Yes | No  |
| 1 Self owned Permanent Yes  | No  | No  | N/A | No  | Yes |
| 1 Self owned Permanent No   | Yes | No  | N/A | Yes | No  |
| 1 Self owned Permanent Yes  | No  | No  | N/A | No  | Yes |
| 1 Self owned Semi- perr No  | Yes | No  | N/A | Yes | No  |
| 1 Self owned Permanent No   | Yes | No  | N/A | No  | No  |
| 1 Self owned Permanent No   | Yes | No  | N/A | Yes | No  |
| 1 Self owned Semi- perr Yes | No  | No  | N/A | Yes | No  |
| 1 Self owned Semi- perr No  | No  | Yes | N/A | Yes | No  |
| 1 Self owned Permanent No   | No  | Yes | N/A | Yes | No  |
| 1 Self owned Permanent No   | No  | Yes | N/A | Yes | No  |
| 1 Self owned Semi- perr No  | No  | Yes | N/A | Yes | No  |
| 1 Self owned Semi- perr No  | Yes | No  | N/A | Yes | No  |
| 1 Self owned Semi- perr No  | No  | Yes | N/A | Yes | No  |
| 1 Self owned Permanent No   | Yes | No  | N/A | Yes | Yes |
| 1 Self owned Permanent No   | Yes | No  | N/A | Yes | No  |
| 1 Self owned Permanent No   | Yes | No  | N/A | Yes | No  |
| 0 From famil' Semi- perr No | No  | Yes | N/A | Yes | No  |
| 1 Self owned Permanent No   | Yes | No  | N/A | No  | Yes |
| 1 Self owned Semi- perr Yes | No  | No  | N/A | No  | No  |
| 1 Self owned Permanent Yes  | No  | No  | N/A | Yes | No  |
| 1 Self owned Semi- perr No  | Yes | No  | N/A | Yes | No  |
| 1 Self owned Semi- perr No  | No  | Yes | N/A | Yes | No  |
| 1 Self owned Permanent No   | Yes | No  | N/A | Yes | No  |
| 1 Self owned Semi- perr No  | No  | Yes | N/A | Yes | No  |
| 1 Self owned Semi- perr Yes | No  | No  | N/A | Yes | No  |
| 1 Self owned Semi- perr No  | Yes | No  | N/A | Yes | No  |
| 1 Self owned Semi- perr Yes | No  | No  | N/A | Yes | Yes |
| 1 Self owned Permanent Yes  | No  | No  | N/A | Yes | Yes |
| 1 Self owned Permanent Yes  | No  | No  | N/A | Yes | No  |
| 1 Self owned Permanent Yes  | No  | No  | N/A | Yes | Yes |
| 1 Self owned Semi- perr No  | Yes | No  | N/A | Yes | No  |
| 1 Self owned Temporary No   | No  | Yes | N/A | Yes | No  |
| 1 Self owned Temporary No   | No  | Yes | N/A | Yes | No  |
| 1 Self owned Permanent No   | Yes | No  | N/A | Yes | No  |
| 1 Self owned Semi- perr No  | No  | No  | N/A | Yes | No  |
| 1 Self owned Semi- perr No  | No  | Yes | N/A | Yes | No  |
| 1 Self owned Semi- perr No  | Yes | No  | N/A | Yes | No  |

|                              |     |     |     |     |     |
|------------------------------|-----|-----|-----|-----|-----|
| 1 Self owned Semi- perrr Yes | No  | Yes | N/A | Yes | No  |
| 1 Self owned Permanent Yes   | No  | No  | N/A | Yes | No  |
| 1 Self owned Permanent Yes   | No  | No  | N/A | Yes | Yes |
| 1 Self owned Permanent Yes   | No  | No  | N/A | Yes | No  |
| 1 Self owned Permanent No    | Yes | No  | N/A | Yes | No  |
| 1 Self owned Permanent Yes   | No  | No  | N/A | Yes | No  |
| 1 Self owned Permanent Yes   | No  | No  | N/A | Yes | Yes |
| 1 Self owned Semi- perrr Yes | No  | No  | N/A | Yes | No  |
| 1 Self owned Permanent No    | Yes | No  | N/A | Yes | No  |
| 1 Self owned Permanent Yes   | No  | No  | N/A | Yes | No  |
| 1 Self owned Semi- perrr No  | No  | Yes | N/A | Yes | No  |
| 1 Self owned Temporary No    | No  | Yes | N/A | Yes | No  |
| 0 Rented Permanent Yes       | No  | No  | N/A | No  | No  |
| 1 Self owned Semi- perrr No  | No  | Yes | N/A | Yes | No  |
| 1 Self owned Semi- perrr No  | No  | Yes | N/A | Yes | No  |
| 1 Self owned Permanent Yes   | No  | No  | N/A | Yes | No  |
| 1 Self owned Permanent Yes   | No  | No  | N/A | No  | No  |
| 1 Self owned Semi- perrr No  | No  | Yes | N/A | Yes | No  |
| 1 Self owned Permanent Yes   | No  | No  | N/A | Yes | No  |
| 1 Self owned Permanent No    | Yes | No  | N/A | Yes | No  |
| 1 Self owned Semi- perrr Yes | No  | No  | N/A | Yes | No  |
| 1 Self owned Permanent Yes   | No  | No  | N/A | Yes | No  |
| 0 Rented Semi- perrr No      | No  | Yes | N/A | Yes | No  |
| 1 Self owned Semi- perrr Yes | No  | No  | N/A | Yes | No  |
| 1 Self owned Temporary No    | No  | Yes | N/A | Yes | No  |
| 1 Self owned Semi- perrr No  | No  | Yes | N/A | Yes | No  |
| 1 Self owned Permanent Yes   | No  | No  | N/A | Yes | No  |
| 1 Self owned Permanent Yes   | No  | No  | N/A | Yes | No  |
| 1 Self owned Semi- perrr Yes | No  | No  | N/A | Yes | No  |
| 1 Self owned Semi- perrr No  | Yes | No  | N/A | Yes | No  |
| 1 Self owned Semi- perrr No  | Yes | No  | N/A | Yes | No  |
| 1 Self owned Permanent Yes   | No  | No  | N/A | Yes | No  |
| 1 Self owned Permanent Yes   | No  | No  | N/A | Yes | No  |
| 1 Self owned Permanent No    | Yes | No  | N/A | Yes | No  |
| 1 Self owned Semi- perrr Yes | No  | No  | N/A | No  | Yes |
| 1 Self owned Semi- perrr No  | Yes | No  | N/A | Yes | No  |
| 1 Self owned Semi- perrr No  | Yes | No  | N/A | Yes | No  |
| 1 Self owned Permanent Yes   | No  | No  | N/A | Yes | No  |
| 1 Self owned Semi- perrr No  | Yes | No  | N/A | Yes | No  |
| 0 Rented Semi- perrr No      | Yes | No  | N/A | Yes | No  |
| 1 Self owned Semi- perrr Yes | No  | No  | N/A | Yes | No  |
| 1 Self owned Semi- perrr No  | Yes | Yes | N/A | Yes | No  |
| 1 Self owned Semi- perrr No  | No  | Yes | N/A | Yes | No  |
| 1 Self owned Semi- perrr No  | Yes | No  | N/A | Yes | No  |
| 1 Self owned Semi- perrr No  | Yes | No  | N/A | Yes | No  |
| 1 Self owned Semi- perrr No  | No  | Yes | N/A | Yes | No  |
| 1 Self owned Permanent Yes   | No  | No  | N/A | Yes | No  |

|                              |     |     |     |     |     |
|------------------------------|-----|-----|-----|-----|-----|
| 1 Self owned Permanent Yes   | No  | No  | N/A | Yes | Yes |
| 1 Self owned Semi- perrr No  | No  | Yes | N/A | Yes | No  |
| 1 Self owned Semi- perrr Yes | No  | No  | N/A | Yes | No  |
| 1 Self owned Permanent No    | Yes | No  | N/A | Yes | Yes |
| 1 Self owned Semi- perrr No  | Yes | Yes | N/A | Yes | No  |
| 1 Self owned Permanent Yes   | No  | No  | N/A | Yes | No  |
| 1 Self owned Semi- perrr No  | Yes | No  | N/A | Yes | No  |
| 1 Self owned Semi- perrr Yes | No  | No  | N/A | No  | No  |
| 1 Self owned Semi- perrr No  | Yes | Yes | N/A | Yes | No  |
| 1 Self owned Semi- perrr Yes | No  | No  | N/A | Yes | No  |
| 1 Self owned Semi- perrr Yes | No  | No  | N/A | Yes | No  |
| 1 Self owned Permanent Yes   | No  | No  | N/A | Yes | No  |
| 1 Self owned Permanent Yes   | No  | No  | N/A | Yes | No  |
| 1 Self owned Semi- perrr No  | Yes | No  | N/A | Yes | No  |
| 1 Self owned Semi- perrr No  | No  | Yes | N/A | Yes | No  |
| 1 Self owned Semi- perrr No  | No  | Yes | N/A | Yes | No  |
| 1 Self owned Permanent Yes   | No  | No  | N/A | Yes | Yes |
| 1 Self owned Permanent No    | Yes | No  | N/A | Yes | No  |
| 1 Self owned Permanent No    | Yes | No  | N/A | Yes | No  |
| 1 Self owned Permanent No    | Yes | Yes | N/A | Yes | No  |
| 1 Self owned Semi- perrr No  | No  | No  | N/A | No  | No  |
| 1 Self owned Semi- perrr No  | No  | No  | N/A | No  | No  |
| 1 Self owned Semi- perrr Yes | No  | No  | N/A | Yes | No  |
| 1 Self owned Semi- perrr No  | Yes | Yes | N/A | Yes | No  |
| 1 Self owned Semi- perrr No  | No  | Yes | N/A | Yes | No  |
| 1 Self owned Semi- perrr No  | Yes | Yes | N/A | Yes | No  |
| 1 Self owned Semi- perrr No  | Yes | No  | N/A | Yes | No  |
| 1 Self owned Temporary No    | No  | Yes | N/A | Yes | No  |
| 1 Self owned Semi- perrr Yes | No  | No  | N/A | Yes | No  |
| 1 Self owned Semi- perrr Yes | No  | No  | N/A | Yes | No  |
| 1 Self owned Semi- perrr No  | No  | Yes | N/A | Yes | No  |
| 1 Self owned Semi- perrr No  | Yes | No  | N/A | Yes | No  |

| charcoal | cooking_kerosene |
|----------|------------------|
|----------|------------------|

|    |    |
|----|----|
| No | No |
|----|----|

|    |    |
|----|----|
| No | No |
|----|----|

|    |    |
|----|----|
| No | No |
|----|----|

|    |    |
|----|----|
| No | No |
|----|----|

|    |    |
|----|----|
| No | No |
|----|----|

|    |    |
|----|----|
| No | No |
|----|----|

|    |    |
|----|----|
| No | No |
|----|----|

|    |    |
|----|----|
| No | No |
|----|----|

|    |    |
|----|----|
| No | No |
|----|----|

|    |    |
|----|----|
| No | No |
|----|----|

|    |    |
|----|----|
| No | No |
|----|----|

|    |    |
|----|----|
| No | No |
|----|----|

|    |    |
|----|----|
| No | No |
|----|----|

|    |    |
|----|----|
| No | No |
|----|----|

|    |    |
|----|----|
| No | No |
|----|----|

|    |    |
|----|----|
| No | No |
|----|----|

|    |    |
|----|----|
| No | No |
|----|----|

|    |    |
|----|----|
| No | No |
|----|----|

|    |    |
|----|----|
| No | No |
|----|----|

|    |    |
|----|----|
| No | No |
|----|----|

|    |    |
|----|----|
| No | No |
|----|----|

|    |    |
|----|----|
| No | No |
|----|----|

|    |    |
|----|----|
| No | No |
|----|----|

|    |    |
|----|----|
| No | No |
|----|----|

|    |    |
|----|----|
| No | No |
|----|----|

|    |    |
|----|----|
| No | No |
|----|----|

|    |    |
|----|----|
| No | No |
|----|----|

|    |    |
|----|----|
| No | No |
|----|----|

|    |    |
|----|----|
| No | No |
|----|----|

|    |    |
|----|----|
| No | No |
|----|----|

|    |    |
|----|----|
| No | No |
|----|----|

|    |    |
|----|----|
| No | No |
|----|----|

|    |    |
|----|----|
| No | No |
|----|----|

|    |    |
|----|----|
| No | No |
|----|----|

|    |    |
|----|----|
| No | No |
|----|----|

|    |    |
|----|----|
| No | No |
|----|----|

|    |    |
|----|----|
| No | No |
|----|----|

|    |    |
|----|----|
| No | No |
|----|----|

|    |    |
|----|----|
| No | No |
|----|----|

|    |    |
|----|----|
| No | No |
|----|----|

|    |    |
|----|----|
| No | No |
|----|----|

|    |    |
|----|----|
| No | No |
|----|----|

|    |    |
|----|----|
| No | No |
|----|----|

|    |    |
|----|----|
| No | No |
|----|----|

|    |    |
|----|----|
| No | No |
|----|----|

|    |    |
|----|----|
| No | No |
|----|----|











|     |     |
|-----|-----|
| No  | No  |
| Yes | No  |
| No  | No  |
| No  | No  |
| No  | No  |
| No  | No  |
| No  | No  |
| No  | No  |
| Yes | No  |
| No  | No  |
| No  | No  |
| No  | No  |
| Yes | No  |
| No  | No  |
| No  | No  |
| No  | No  |
| No  | No  |
| No  | No  |
| No  | No  |
| No  | No  |
| No  | No  |
| No  | No  |
| No  | No  |
| No  | No  |
| No  | No  |
| Yes | No  |
| No  | No  |
| No  | No  |
| No  | No  |
| No  | Yes |
| No  | Yes |
| No  | No  |
| No  | No  |
| No  | No  |
| No  | No  |
| No  | No  |
| No  | No  |
| No  | No  |
| No  | No  |
| Yes | No  |
| Yes | No  |
| Yes | No  |
| No  | No  |
| No  | No  |
| No  | No  |
